# Supplementary material for: The Aging Features of Thyrotoxicosis Mice: Malnutrition, Immunosenescence and Lipotoxicity
Source: Front Immunol. 2022 Jun 2;13:864929. doi: 10.3389/fimmu.2022.864929 (PMC9201349; doi:10.3389/fimmu.2022.864929)
Supplement: Supplementary file 2 [file Table_2.xlsx]

## Sheet: T_C
ID	m/z	Retention time (min)	Ion mode	Metabolites	Compound ID	Super Class	Class	Sub Class	kegg	Score	Fragmentation Score	Adducts	Formula	Mass Error (ppm)	P-value	adj.P-value	log2(FC)	FC	average(T)	average(C)	T1	T2	T3	T4	T5	T6	C1	C2	C3	C4	C5	C6
6.45_892.9969m/z	892.997	6.44873	pos	P1,P4-Bis(5'-xanthosyl) tetraphosphate	HMDB0003834	Nucleosides, nucleotides, and analogues	(5'->5')-dinucleotides	Unclassified	C04392	38.1	0.0581	M+Na	C20H26N8O23P4	1.74388	0.00287653	0.0422697	-1.44681	0.366831	32.4984	88.5923	34.2346	30.612	1.22957e-06	62.0651	24.5046	43.574	74.3201	61.29	139.99	96.5547	90.0419	69.3568
2.49_187.0070m/z	187.007	2.49233	neg	p-Toluenesulfonic acid	HMDB0059933	Benzenoids	Benzene and substituted derivatives	Benzenesulfonic acids and derivatives	C06677	48.4	43.6	M-H	C7H8O4S	-0.303143	0.00041973	0.0305408	-3.25528	0.104728	72.1004	688.456	6.72454	123.921	7.21093	219.853	2.26937	72.6234	654.841	373.449	1069.78	973.653	455.184	603.832
2.11_178.0508m/z	178.051	2.10718	neg	Hippuric acid	HMDB0000714	Benzenoids	Benzene and substituted derivatives	Benzoic acids and derivatives	C01586	45.1	28.4	M-H	C9H9NO3	-1.13522	4.57636e-06	0.00434318	-4.22696	0.0534019	4.28806	80.2979	4.55999	6.36384	4.53017	3.04165	2.27246	4.96027	73.514	93.4208	96.8402	63.7644	50.738	103.51
2.92_119.0499m/z	119.05	2.92082	neg	4-Methylbenzaldehyde	HMDB0029638	Benzenoids	Benzene and substituted derivatives	Benzoyl derivatives	C06758	37.7	0	M-H	C8H8O	-2.52008	0.00909815	0.0554966	-1.62262	0.324746	3.93142	12.1061	7.26684	5.14869	5.18422	2.27203	2.20077	1.51596	3.21857	13.7462	13.6176	10.8778	20.9398	10.2369
2.49_119.0499m/z	119.05	2.49233	neg	2-Methylbenzaldehyde	HMDB0029636	Benzenoids	Benzene and substituted derivatives	Benzoyl derivatives	C07214	40.3	6.17	M-H	C8H8O	-3.07818	0.00432003	0.0447274	-2.17654	0.221205	29.6325	133.959	36.1389	43.5599	23.7163	36.0353	26.8012	11.5434	35.1543	146.605	223.021	92.0932	193.655	113.227
3.99_273.0434m/z	273.043	3.98743	neg	4-Hydroxy-5-(phenyl)-valeric acid-O-sulphate	HMDB0059981	Benzenoids	Benzene and substituted derivatives	Unclassified		37.2	3.33	M-H	C11H14O6S	-1.68956	0.0158148	0.067824	-1.45297	0.365268	4.19665	11.4893	9.6699	3.83301	5.70767	2.71144	0.00450741	3.25339	7.1637	9.04244	18.6012	4.98532	14.574	14.5689
2.36_192.0664m/z	192.066	2.36352	neg	Phenylacetylglycine	HMDB0000821	Organic acids and derivatives	Carboxylic acids and derivatives	Amino acids, peptides, and analogues	C05598	46.1	36.8	M-H	C10H11NO3	-1.09318	0.000274945	0.0265254	-2.65422	0.158855	15.0481	94.729	8.73005	5.07946	6.75934	38.3858	18.0651	13.2689	57.0647	84.8703	136.233	95.5613	62.9726	131.672
1.28_309.1090m/z	309.109	1.2754	neg	gamma-Glutamyltyrosine	HMDB0011741	Organic acids and derivatives	Carboxylic acids and derivatives	Amino acids, peptides, and analogues		51.1	60.2	M-H	C14H18N2O6	-0.832522	0.00379873	0.0441799	-1.07295	0.475347	19.3951	40.8019	16.6316	22.5987	22.2595	13.9465	16.6996	24.2345	57.6742	47.8323	37.0385	36.6291	46.9475	18.69
1.87_371.1927m/z	371.193	1.86503	neg	Alanyl-Proline	HMDB0028695	Organic acids and derivatives	Carboxylic acids and derivatives	Amino acids, peptides, and analogues		38.2	0	2M-H	C8H14N2O3	-2.4722	0.0154027	0.0672025	-1.01478	0.494903	7.04098	14.227	7.33026	4.23583	5.86029	7.75936	11.1454	5.91478	23.8057	12.8459	16.0724	14.7383	8.18353	9.71609
7.29_571.2871m/z	571.287	7.2876	neg	Isodesmosine	HMDB0000739	Organic acids and derivatives	Carboxylic acids and derivatives	Tetracarboxylic acids and derivatives		36.7	0.749	M+FA-H	C24H40N5O8+	2.24566	0.00601814	0.0489346	-1.02867	0.490163	83.0292	169.391	93.7238	92.0771	108.789	47.4382	68.3449	87.8018	113.514	185.987	272.254	134.42	137.712	172.458
2.83_327.0871m/z	327.087	2.83448	neg	2-Hydroxycinnamic acid	HMDB0002641	Phenylpropanoids and polyketides	Cinnamic acids and derivatives	Hydroxycinnamic acids and derivatives	C01772	42.9	19.7	2M-H	C9H8O3	-0.84046	2.75287e-05	0.00971489	-23.3568	9.30916e-08	1.22957e-06	13.2081	1.22957e-06	1.22957e-06	1.22957e-06	1.22957e-06	1.22957e-06	1.22957e-06	13.8462	17.196	13.7364	18.063	10.3568	6.05042
1.85_163.0397m/z	163.04	1.85087	neg	cis-p-Coumaric acid	HMDB0030677	Phenylpropanoids and polyketides	Cinnamic acids and derivatives	Hydroxycinnamic acids and derivatives	C06738	41.2	14	M-H	C9H8O3	-1.94628	0.0461518	0.112716	-1.27032	0.414569	6.20883	14.9766	11.1276	5.89185	5.96088	4.98782	6.86677	2.418	2.38316	13.7754	23.7603	10.7591	26.9139	12.2678
2.49_163.0399m/z	163.04	2.49233	neg	m-Coumaric acid	HMDB0001713	Phenylpropanoids and polyketides	Cinnamic acids and derivatives	Hydroxycinnamic acids and derivatives	C12621	48.5	44.8	M-H	C9H8O3	-0.910602	0.00227104	0.0398813	-2.2836	0.205385	68.5501	333.764	97.513	76.579	59.5364	73.9564	71.3958	32.3199	99.0438	370.659	516.47	231.015	487.758	297.635
1.91_258.9916m/z	258.992	1.90787	neg	Caffeic acid 3-sulfate	HMDB0041706	Phenylpropanoids and polyketides	Cinnamic acids and derivatives	Hydroxycinnamic acids and derivatives		44.1	24.8	M-H	C9H8O7S	-0.651855	0.021128	0.0761017	-1.21428	0.430989	24.3878	56.5856	29.5776	23.1826	26.3576	24.5722	22.6923	19.9444	12.8671	43.8625	67.7656	100.087	54.267	60.6643
4.81_353.2326m/z	353.233	4.81405	neg	Prostaglandin F2a	HMDB0001139	Lipids and lipid-like molecules	Fatty Acyls	Eicosanoids	C00639	41.3	14.1	M-H	C20H34O5	-2.22278	0.000391247	0.0292293	-1.22932	0.426518	150.158	352.057	38.0169	160.761	168.977	141.979	189.079	202.138	328.275	341.811	475.786	340.94	247.94	377.588
6.39_336.2297n	335.222	6.39465	neg	Prostaglandin A1	HMDB0002656	Lipids and lipid-like molecules	Fatty Acyls	Eicosanoids	C04685	42.2	16	M-H2O-H, M-H	C20H32O4	-0.947527	0.000128652	0.0181605	-1.42807	0.371627	609.471	1640.01	256.865	614.643	741.4	370.2	709.914	963.806	1535.31	1705.06	2038.08	1985.45	1244.42	1331.73
6.39_331.1911m/z	331.191	6.39465	neg	15-Keto-prostaglandin E2	HMDB0003175	Lipids and lipid-like molecules	Fatty Acyls	Eicosanoids	C04707	43.1	29.5	M-H2O-H	C20H30O5	-1.14762	0.00504987	0.0469901	-1.70273	0.307204	14.5456	47.3482	1.45026	8.41931	18.212	5.81824	26.4642	26.9093	34.9648	36.8976	74.253	70.9826	34.67	32.3211
4.82_372.2746m/z	372.275	4.82063	pos	Prostaglandin E1	HMDB0001442	Lipids and lipid-like molecules	Fatty Acyls	Eicosanoids	C04741	39.6	11.7	M+NH4	C20H34O5	0.387298	0.0103851	0.0579515	-1.00196	0.499321	25.0801	50.2284	2.17969	34.1673	34.3691	20.6074	29.8176	29.3395	51.8964	42.9079	62.1873	50.4612	25.2676	68.6502
5.79_334.2148n	335.222	5.79342	pos	Prostaglandin J2	HMDB0002710	Lipids and lipid-like molecules	Fatty Acyls	Eicosanoids	C05957	47.9	56	M+H-H2O, M+H	C20H30O4	1.09289	0.0368014	0.0988184	-1.24658	0.421446	30.98	73.5089	1.22957e-06	30.2792	52.6727	17.9637	41.2782	43.6861	52.9127	68.1824	71.7764	145.996	31.4169	70.769
5.80_334.2139n	333.206	5.80335	neg	Delta-12-Prostaglandin J2	HMDB0004238	Lipids and lipid-like molecules	Fatty Acyls	Eicosanoids	C05958	39.6	10.4	M-H2O-H, M-H	C20H30O4	-1.60104	0.00020547	0.0224839	-1.77867	0.291453	55.7346	191.23	16.1783	50.5117	79.6301	46.9969	65.9663	75.1245	168.4	200.317	261.076	243.192	123.683	150.714
4.09_369.2273m/z	369.227	4.0886	neg	Thromboxane B2	HMDB0003252	Lipids and lipid-like molecules	Fatty Acyls	Eicosanoids	C05963	40.4	9.2	M-H	C20H34O6	-2.46755	0.0217482	0.0770771	-1.05378	0.481703	48.389	100.454	16.5234	26.7257	61.3592	11.3666	102.397	71.9624	119.372	108.466	138.705	105.464	56.3282	74.3889
7.68_569.2909m/z	569.291	7.68467	pos	Leukotriene F4	HMDB0006465	Lipids and lipid-like molecules	Fatty Acyls	Eicosanoids	C06462	36.1	0	M+H	C28H44N2O8S	3.17473	0.0420533	0.106767	-2.29637	0.203574	10.3034	50.6127	5.36371	7.40049	1.22957e-06	33.8669	1.22957e-06	15.1895	42.6859	34.7977	131.763	32.6068	39.742	22.0802
6.13_335.2222m/z	335.222	6.13117	neg	Hepoxilin A3	HMDB0004688	Lipids and lipid-like molecules	Fatty Acyls	Eicosanoids	C14808	41.2	18	M-H	C20H32O4	-1.86667	0.000190995	0.0215686	-1.45871	0.363817	84.4923	232.238	42.5844	81.8005	95.9034	50.5302	99.0546	137.08	245.176	228.424	299.238	276.791	172.801	170.999
0.86_221.0664m/z	221.066	0.856417	neg	2-Isopropylmalic acid	HMDB0000402	Lipids and lipid-like molecules	Fatty Acyls	Fatty acids and conjugates	C02504	37.9	0	M+FA-H	C7H12O5	-1.63887	0.00241007	0.0404772	-1.74572	0.298186	0.968187	3.24693	0.70342	0.576663	0.755226	1.22957e-06	2.15537	1.61844	2.88172	1.4522	3.15039	4.60913	3.00585	4.38226
4.24_363.2175m/z	363.217	4.23958	neg	17,18-EpETE	HMDB0010212	Lipids and lipid-like molecules	Fatty Acyls	Fatty acids and conjugates	C13843	38.5	5.13	M+FA-H	C20H30O3	-0.644189	0.00656693	0.0501509	-3.11422	0.115485	1.44393	12.5032	1.22957e-06	1.22957e-06	5.40253	3.26107	1.22957e-06	1.22957e-06	23.2626	10.3562	18.4131	3.85545	14.0035	5.12861
1.29_205.0716m/z	205.072	1.2899	neg	3-Methyladipic acid	HMDB0000555	Lipids and lipid-like molecules	Fatty Acyls	Fatty acids and conjugates		39.9	8.97	M+FA-H	C7H12O4	-1.06324	0.0147978	0.0661305	-3.46663	0.0904564	0.238906	2.64111	0.272546	0.908742	1.22957e-06	1.22957e-06	0.252143	1.22957e-06	2.35432	4.48877	1.37835	1.70053	5.53452	0.390189
1.92_93.0343m/z	93.0343	1.9222	neg	(2E,4E)-2,4-Hexadienoic acid	HMDB0029581	Lipids and lipid-like molecules	Fatty Acyls	Fatty acids and conjugates		46.4	39.7	M-H2O-H	C6H8O2	-2.43736	0.016699	0.0690734	-1.12323	0.459064	13.7502	29.9527	10.3485	17.9819	12.586	8.32173	16.4441	16.819	21.369	45.7426	11.7243	31.0335	25.5957	44.2509
5.61_375.2533m/z	375.253	5.60535	neg	Docosapentaenoic acid (22n-3)	HMDB0006528	Lipids and lipid-like molecules	Fatty Acyls	Fatty acids and conjugates	C16513	42.4	18.6	M+FA-H	C22H34O2	-2.34131	0.00202275	0.110403	-7.2206	6.01722e-08	1.22957e-06	20.4341	1.22957e-06	1.22957e-06	1.22957e-06	1.22957e-06	1.22957e-06	1.22957e-06	69.468	32.5292	10.5543	6.59208	2.35999	1.10128
6.94_293.2123m/z	293.212	6.94362	neg	13-L-Hydroperoxylinoleic acid	HMDB0003871	Lipids and lipid-like molecules	Fatty Acyls	Lineolic acids and derivatives	C04717	39.3	14.5	M-H2O-H	C18H32O4	0.240969	0.0395773	0.103133	-1.6525	0.318089	9.04973	28.4503	11.387	8.11965	15.7856	5.3322	7.02456	6.64927	20.5089	66.2506	29.9428	10.6709	26.1417	17.1867
5.83_311.2222m/z	311.222	5.833	neg	(10E,12Z)-(9S)-9-Hydroperoxyoctadeca-10,12-dienoic acid	HMDB0062434	Lipids and lipid-like molecules	Fatty Acyls	Lineolic acids and derivatives	C14827	39.1	9.52	M-H	C18H32O4	-1.83448	0.00784493	0.0526874	-1.00794	0.497257	31.5841	63.5167	38.0997	36.3166	45.0884	18.8736	18.1822	32.9441	64.9002	101.287	63.2802	60.0861	37.7873	53.7596
7.06_605.4564m/z	605.456	7.05587	pos	DG(16:0/16:1(9Z)/0:0)	HMDB0007099	Lipids and lipid-like molecules	Glycerolipids	Diradylglycerols	C00165	37.2	2.85	M+K	C35H66O5	3.91524	0.0332604	0.0935979	-1.41298	0.375534	88.0766	234.537	12.9923	67.2521	64.2029	16.0417	61.7718	306.199	218.532	264.766	316.25	348.556	92.6397	166.478
6.98_838.5596m/z	838.56	6.97745	neg	PC(22:5(7Z,10Z,13Z,16Z,19Z)/15:0)	HMDB0008691	Lipids and lipid-like molecules	Glycerophospholipids	Glycerophosphocholines	C00157	37.4	4.19	M+FA-H	C45H80NO8P	-0.895158	0.000445966	0.030783	-1.20064	0.435083	38.0524	87.4602	7.28701	43.5548	46.9068	27.5838	39.7796	63.2027	91.6202	84.7716	102.009	100.133	82.523	63.7051
6.90_614.3452m/z	614.345	6.89978	neg	LysoPC(22:5(7Z,10Z,13Z,16Z,19Z))	HMDB0010403	Lipids and lipid-like molecules	Glycerophospholipids	Glycerophosphocholines	C04230	44.3	39.4	M+FA-H	C30H52NO7P	-1.97855	0.00554661	0.0481351	-1.56719	0.337465	29.4932	87.3964	15.6176	12.684	45.6505	14.7057	45.4145	42.8869	145.559	100.281	77.4118	101.678	54.3871	45.0627
3.17_466.2941m/z	466.294	3.17438	pos	LysoPC(14:1(9Z))	HMDB0010380	Lipids and lipid-like molecules	Glycerophospholipids	Glycerophosphocholines	C04230	38.6	11.8	M+H	C22H44NO7P	2.81165	0.00181787	0.0375807	-1.37835	0.384658	31.9408	83.0369	49.5268	23.7073	16.9256	44.6933	22.6995	34.0925	60.0992	92.8396	102.587	56.1026	121.903	64.6897
7.04_614.3448m/z	614.345	7.04478	neg	LysoPC(22:5(4Z,7Z,10Z,13Z,16Z))	HMDB0010402	Lipids and lipid-like molecules	Glycerophospholipids	Glycerophosphocholines	C04230	46.1	42.5	M+FA-H	C30H52NO7P	-2.63767	0.00189201	0.0380923	-1.26135	0.417155	159.875	383.251	108.41	160.204	197.614	188.952	223.013	81.0552	471.552	363.738	465.794	504.949	288.803	204.668
7.06_814.5600m/z	814.56	7.05895	neg	PE(22:2(13Z,16Z)/16:1(9Z))	HMDB0009551	Lipids and lipid-like molecules	Glycerophospholipids	Glycerophosphoethanolamines	C00350	38.9	3.09	M+FA-H	C43H80NO8P	-0.404161	0.00518636	0.0473823	-1.08129	0.472605	672.677	1423.34	376.417	555.045	772.129	477.814	705.317	1149.34	1474.01	1630.79	2015.99	1597.36	957.531	864.356
2.94_858.5271m/z	858.527	2.94273	pos	PS(18:0/22:6(4Z,7Z,10Z,13Z,16Z,19Z))	HMDB0010167	Lipids and lipid-like molecules	Glycerophospholipids	Glycerophosphoserines	C02737	36.4	2.57	M+Na	C46H78NO10P	1.81754	0.0303194	0.0890529	-1.89823	0.268272	65.4244	243.873	107.024	59.1394	42.9462	95.8921	35.3308	52.214	143.316	306.788	507.895	79.5643	341.86	83.8156
0.81_153.0401m/z	153.04	0.813	pos	Xanthine	HMDB0000292	Organoheterocyclic compounds	Imidazopyrimidines	Purines and purine derivatives	C00385	48.5	48.2	M+H	C5H4N4O2	-3.70549	0.0195363	0.0738677	-5.65287	0.0198754	2.19916	110.647	2.1718	2.57471	2.78411	4.97149	0.692852	1.22957e-06	169.556	257.447	24.2376	80.797	130.516	1.33119
0.65_281.0533m/z	281.053	0.654267	neg	beta-D-3-Ribofuranosyluric acid	HMDB0029920	Organoheterocyclic compounds	Imidazopyrimidines	Purines and purine derivatives	C05513	37	0	M-H2O-H	C10H12N4O7	1.72675	5.71588e-05	0.0137893	-1.17014	0.444378	11.1711	25.1388	10.207	3.05512	12.4834	13.4162	10.8075	17.0574	23.4913	23.7031	23.996	29.3571	25.4334	24.8517
3.01_204.0664m/z	204.066	3.00782	neg	5-Methoxyindoleacetate	HMDB0004096	Organoheterocyclic compounds	Indoles and derivatives	Indolyl carboxylic acids and derivatives	C05660	43.9	27	M-H	C11H11NO3	-0.960895	3.51261e-06	0.00434318	-24.081	5.63506e-08	1.22957e-06	21.8199	1.22957e-06	1.22957e-06	1.22957e-06	1.22957e-06	1.22957e-06	1.22957e-06	29.3131	18.0003	22.3403	13.3999	20.8345	27.0316
4.36_175.0249m/z	175.025	4.35692	neg	Pyruvic acid	HMDB0000243	Organic acids and derivatives	Keto acids and derivatives	Alpha-keto acids and derivatives	C00022	39.1	0	2M-H	C3H4O3	0.618856	0.00447616	0.0448102	-1.48407	0.357479	5.49058	15.3592	4.42064	3.82735	7.44084	10.4854	2.74766	4.02166	13.91	12.8516	17.6184	18.0796	6.02242	23.6728
1.98_129.0555m/z	129.055	1.97903	neg	Ketoleucine	HMDB0000695	Organic acids and derivatives	Keto acids and derivatives	Short-chain keto acids and derivatives	C00233	39.4	0	M-H	C6H10O3	-1.95268	0.00765412	0.0523334	-1.17029	0.444332	88.1181	198.316	64.9105	141.554	69.2039	57.507	81.5185	114.014	193.856	258.019	183.521	188.832	290.382	75.2852
1.87_173.9985n	172.991	1.86503	neg	Phenol sulphate	HMDB0060015	Organic acids and derivatives	Organic sulfuric acids and derivatives	Arylsulfates	C02180	45	27.2	M-H, 2M-H	C6H6O4S	-1.08751	0.000549343	0.0313089	-6.80819	0.00892341	4.26528	477.987	7.00473	6.00068	5.04758	2.48668	1.6081	3.44392	312.63	779.099	169.236	486.987	411.615	708.358
2.36_203.0013m/z	203.001	2.36352	neg	O-methoxycatechol-O-sulphate	HMDB0060013	Organic acids and derivatives	Organic sulfuric acids and derivatives	Arylsulfates		47	51.9	M-H	C7H8O5S	-3.33018	0.023029	0.0788026	-19.6607	1.2065e-06	1.22957e-06	1.01912	1.22957e-06	1.22957e-06	1.22957e-06	1.22957e-06	1.22957e-06	1.22957e-06	1.22957e-06	1.22957e-06	0.895087	1.94604	1.08088	2.19271
2.06_425.0105m/z	425.011	2.06453	neg	Indoxyl sulfate	HMDB0000682	Organic acids and derivatives	Organic sulfuric acids and derivatives	Arylsulfates		44.7	47.7	2M-H	C8H7NO4S	-3.15522	2.03178e-05	0.00911098	-5.44066	0.023025	1.11584	48.4621	1.22957e-06	1.05473	1.22957e-06	4.23777	1.22957e-06	1.40253	35.4078	70.5872	53.0928	59.2887	29.9375	42.4588
2.21_287.0231m/z	287.023	2.20718	neg	5'-(3',4'-Dihydroxyphenyl)-gamma-valerolactone sulfate	HMDB0029191	Organic acids and derivatives	Organic sulfuric acids and derivatives	Arylsulfates		38	0	M-H	C11H12O7S	-0.0644419	0.0141913	0.065079	-2.28313	0.205452	1.04724	5.09725	1.29936	2.55084	1.73754	0.427094	1.22957e-06	0.268611	1.22957e-06	4.04758	3.89929	9.18073	7.28106	6.17483
2.14_187.0068m/z	187.007	2.13552	neg	p-Cresol sulfate	HMDB0011635	Organic acids and derivatives	Organic sulfuric acids and derivatives	Arylsulfates		39.9	13.8	M-H	C7H8O4S	-1.40971	0.0260531	0.0833161	-2.09751	0.233661	1.11324	4.76435	2.90421	0.215462	0.403811	0.00409242	0.773325	2.37854	2.29244	3.34421	10.872	2.44456	4.34837	5.28448
2.01_245.0124m/z	245.012	2.00737	neg	4-Vinylphenol sulfate	HMDB0062775	Organic acids and derivatives	Organic sulfuric acids and derivatives	Arylsulfates		43.1	18.7	M+FA-H	C8H8O4S	-0.520714	0.0127598	0.0625084	-2.03068	0.24474	15.9139	65.0235	14.8101	42.3273	9.52955	2.82963	18.335	7.65159	68.1609	69.1728	129.056	16.3366	44.7096	62.7051
1.71_188.9861m/z	188.986	1.70937	neg	Pyrocatechol sulfate	HMDB0059724	Organic acids and derivatives	Organic sulfuric acids and derivatives	Arylsulfates		46.2	38.3	M-H	C6H6O5S	-0.925855	0.00629288	0.0496674	-1.41274	0.375598	9.63298	25.647	2.90571	10.028	7.51262	25.6907	1.37941	10.2814	35.7196	24.2545	26.0249	23.5442	13.7934	30.5455
6.83_642.3474m/z	642.347	6.82703	pos	(3a,5b,7a,12a)-24-[(carboxymethyl)amino]-1,12-dihydroxy-24-oxocholan-3-yl-b-D-Glucopyranosiduronic acid	HMDB0002472	Organic nitrogen compounds	Organonitrogen compounds	Oximes		37.3	0	M+H	C32H51NO12	-1.52326	0.0180628	0.0714813	-1.39277	0.380833	84.9393	223.036	95.9078	43.0297	18.3881	198.539	52.7426	101.029	217.386	163.965	413.867	200.063	223.866	119.067
5.84_792.1263m/z	792.126	5.84058	pos	Acetyl-CoA	HMDB0001206	Organic oxygen compounds	Organooxygen compounds	Carbohydrates and carbohydrate conjugates	C00024	38.4	12.2	M+H-H2O	C23H38N7O17P3S	4.77021	0.00410033	0.0442848	-1.02276	0.492174	41.0905	83.4877	34.4055	36.9276	25.5267	69.5315	30.6175	49.534	63.4218	93.1672	110.561	76.5957	104.257	52.9231
1.96_269.0669m/z	269.067	1.96487	neg	Phenylglucuronide	HMDB0059806	Organic oxygen compounds	Organooxygen compounds	Carbohydrates and carbohydrate conjugates		52.3	69.9	M-H	C12H14O7	0.663054	0.00446063	0.0448102	-24.1358	5.42511e-08	1.22957e-06	22.6643	1.22957e-06	1.22957e-06	1.22957e-06	1.22957e-06	1.22957e-06	1.22957e-06	12.0533	43.8939	3.26535	16.3244	24.637	35.8121
3.35_369.1186m/z	369.119	3.34697	neg	4-Hydroxy-5-(phenyl)-valeric acid-O-glucuronide	HMDB0059980	Organic oxygen compounds	Organooxygen compounds	Carbohydrates and carbohydrate conjugates		36.4	2.22	M-H	C17H22O9	-1.28644	0.000991556	0.0345667	-5.26419	0.0260208	0.100278	3.85377	0.601664	1.22957e-06	1.22957e-06	1.22957e-06	1.22957e-06	1.22957e-06	1.22957e-06	4.86102	4.45339	3.91688	4.19576	5.69557
2.52_283.0822m/z	283.082	2.521	neg	p-Cresol glucuronide	HMDB0011686	Organic oxygen compounds	Organooxygen compounds	Carbohydrates and carbohydrate conjugates		47.1	37.6	M-H	C13H16O7	-0.578899	0.000273291	0.0265254	-4.76207	0.0368531	8.4711	229.861	2.37492	22.9469	0.850481	21.5692	1.22957e-06	3.08509	163.037	133.393	335.462	361.219	150.1	235.956
1.88_443.1181m/z	443.118	1.8792	neg	5-(3',4'-Dihydroxyphenyl)-gamma-valerolactone-3'-O-methyl-4'-O-glucuronide	HMDB0059988	Organic oxygen compounds	Organooxygen compounds	Carbohydrates and carbohydrate conjugates		38.9	9	M+FA-H	C18H22O10	-3.52126	0.0182134	0.0717958	-2.07883	0.236706	1.35384	5.71952	2.80846	1.28899	1.22957e-06	1.56905	2.45656	1.22957e-06	0.904266	5.06145	11.788	7.18431	5.02422	4.35486
4.34_503.1433m/z	503.143	4.34225	neg	5-Hydroxy-N-formylkynurenine	HMDB0004086	Organic oxygen compounds	Organooxygen compounds	Carbonyl compounds	C05648	38.4	0	2M-H	C11H12N2O5	2.68802	0.0046917	0.045643	-1.2792	0.412023	11.4087	27.6894	11.822	5.77789	16.8129	18.248	8.0184	7.7729	22.3126	27.9265	30.6229	31.3865	12.4186	41.4695
1.70_443.1187m/z	443.119	1.69538	neg	5-(3',4'-dihydroxyphenyl)-gamma-valerolactone-3'-O-glucuronide	HMDB0029190	Benzenoids	Phenol ethers	Unclassified		39.6	11.3	M+FA-H	C18H22O10	-2.09105	0.0282877	0.086377	-1.77484	0.292227	8.7424	29.9165	14.1018	13.4185	5.21913	5.06942	12.1361	2.50945	5.69312	39.6816	61.0281	16.9579	35.064	21.0742
2.12_134.0610m/z	134.061	2.12135	neg	Dopamine	HMDB0000073	Benzenoids	Phenols	Benzenediols	C03758	37.9	0	M-H2O-H	C8H11NO2	-0.994586	0.00215472	0.0392216	-23.661	7.5394e-08	1.22957e-06	16.3085	1.22957e-06	1.22957e-06	1.22957e-06	1.22957e-06	1.22957e-06	1.22957e-06	7.15046	14.2932	32.5724	7.1626	14.3976	22.2752
2.49_107.0500m/z	107.05	2.49233	neg	p-Cresol	HMDB0001858	Benzenoids	Phenols	Cresols	C01468	38.2	0	M-H	C7H8O	-1.8062	0.0286641	0.0867991	-2.08985	0.234905	8.5606	36.4429	0.939762	7.18334	4.32747	33.8509	0.917626	4.14454	16.9494	30.2746	82.8389	31.4459	34.0739	23.0745
3.90_179.1080m/z	179.108	3.89977	neg	p-Cymene	HMDB0005805	Lipids and lipid-like molecules	Prenol lipids	Monoterpenoids	C06575	38.5	0	M+FA-H	C10H14	1.54611	0.0482471	0.115713	-1.01978	0.493191	11.6028	23.5259	6.33237	5.15811	9.38412	27.0547	8.53657	13.1508	14.0772	36.5467	35.4596	23.2806	15.3792	16.4124
4.34_473.1630m/z	473.163	4.34225	neg	Sepiapterin	HMDB0000238	Organoheterocyclic compounds	Pteridines and derivatives	Pterins and derivatives	C00835	38.2	0	2M-H	C9H11N5O3	-4.43804	0.00031091	0.0284039	-1.77334	0.292531	3.62475	12.391	4.55256	1.15991	4.29869	7.05866	1.26707	3.41164	13.3404	10.585	14.6753	13.2683	6.64989	15.8272
1.00_182.0458m/z	182.046	1.00025	neg	4-Pyridoxic acid	HMDB0000017	Organoheterocyclic compounds	Pyridines and derivatives	Pyridinecarboxylic acids and derivatives	C00847	40	8.79	M-H	C8H9NO4	-0.232773	0.00386754	0.0441799	-1.67314	0.31357	4.0916	13.0484	5.42368	3.21391	3.96589	2.51174	3.23437	6.20001	12.9197	13.3517	6.66903	21.9572	16.0729	7.32017
4.90_335.2225m/z	335.222	4.90305	neg	Androsterone	HMDB0000031	Lipids and lipid-like molecules	Steroids and steroid derivatives	Androstane steroids	C00523	37.7	0.656	M+FA-H	C19H30O2	-1.10574	0.00220842	0.0396112	-1.96301	0.256492	10.4723	40.8288	4.57219	3.17019	6.35923	15.1803	12.7356	20.8161	25.0006	65.721	25.3713	51.1873	48.7409	28.9516
5.58_335.2223m/z	335.222	5.57568	neg	Etiocholanolone	HMDB0000490	Lipids and lipid-like molecules	Steroids and steroid derivatives	Androstane steroids	C04373	37.5	2.97	M+FA-H	C19H30O2	-1.71389	0.000233303	0.0240702	-1.6363	0.32168	12.9535	40.2684	1.43941	13.7444	17.6079	5.8581	18.4964	20.575	45.1586	39.3928	47.9592	49.7147	25.9874	33.3975
4.44_351.2170m/z	351.217	4.44492	neg	11-Hydroxyandrosterone	HMDB0002984	Lipids and lipid-like molecules	Steroids and steroid derivatives	Androstane steroids	C14606	36.6	5.03	M+FA-H	C19H30O3	-2.33501	0.00326919	0.0435434	-3.04535	0.121132	1.27354	10.5137	1.22957e-06	1.22957e-06	6.6072	1.03403	1.22957e-06	1.22957e-06	9.8085	16.0638	16.6907	10.6418	3.04813	6.82915
6.07_392.2920n	391.285	6.07117	neg	Chenodeoxycholic acid	HMDB0000518	Lipids and lipid-like molecules	Steroids and steroid derivatives	Bile acids, alcohols and derivatives	C02528	40	9.39	M-H, M+FA-H	C24H40O4	-1.77254	3.69869e-06	0.00434318	-26.3526	1.16703e-08	1.22957e-06	105.358	1.22957e-06	1.22957e-06	1.22957e-06	1.22957e-06	1.22957e-06	1.22957e-06	156.712	103.497	70.1066	94.3369	103.676	103.821
6.06_410.3264m/z	410.326	6.06108	pos	Deoxycholic acid	HMDB0000626	Lipids and lipid-like molecules	Steroids and steroid derivatives	Bile acids, alcohols and derivatives	C04483	46.1	49.6	M+NH4	C24H40O4	-0.14763	0.000582145	0.0320831	-23.7051	7.31214e-08	1.22957e-06	16.8154	1.22957e-06	1.22957e-06	1.22957e-06	1.22957e-06	1.22957e-06	1.22957e-06	28.9039	18.2407	5.44232	16.1838	10.2411	21.8807
7.78_463.3412m/z	463.341	7.78242	neg	3a,7a-Dihydroxy-5b-cholestan-26-al	HMDB0006894	Lipids and lipid-like molecules	Steroids and steroid derivatives	Bile acids, alcohols and derivatives	C05445	39.1	10.7	M+FA-H	C27H46O3	-4.12323	0.000461534	0.030783	-2.43267	0.185222	3.85704	20.8239	6.36683	2.19263	6.77797	3.31364	2.92759	1.56357	25.5554	31.6502	12.6282	13.3437	25.616	16.1496
3.30_411.2377m/z	411.238	3.30313	neg	Tetrahydrocortisol	HMDB0000949	Lipids and lipid-like molecules	Steroids and steroid derivatives	Bile acids, alcohols and derivatives	C05465	37.6	0	M+FA-H	C21H34O5	-3.18454	0.00921403	0.0557981	-22.5969	1.57633e-07	1.22957e-06	7.8002	1.22957e-06	1.22957e-06	1.22957e-06	1.22957e-06	1.22957e-06	1.22957e-06	14.9756	3.03843	2.96845	3.94147	6.23644	15.6408
4.56_498.2884m/z	498.288	4.56257	neg	Taurochenodesoxycholic acid	HMDB0000951	Lipids and lipid-like molecules	Steroids and steroid derivatives	Bile acids, alcohols and derivatives	C05465	37.9	0	M-H	C26H45NO6S	-2.25354	0.000842477	0.033524	-7.28535	0.00641051	0.543343	84.7582	3.26005	1.22957e-06	1.22957e-06	1.22957e-06	1.22957e-06	1.22957e-06	81.796	88.8864	165.279	67.435	33.277	71.8759
7.59_463.3416m/z	463.342	7.59275	neg	20a,22b-Dihydroxycholesterol	HMDB0006763	Lipids and lipid-like molecules	Steroids and steroid derivatives	Bile acids, alcohols and derivatives	C05501	36.5	6.81	M+FA-H	C27H46O3	-3.21598	0.00866339	0.054923	-1.70597	0.306516	4.03036	13.1489	6.94205	2.81895	6.0849	3.10021	2.35273	2.8833	13.683	24.7169	7.70533	8.57181	15.9543	8.26227
4.28_408.2865n	453.284	4.28358	neg	Alpha-Muricholic acid	HMDB0000506	Lipids and lipid-like molecules	Steroids and steroid derivatives	Bile acids, alcohols and derivatives	C17647	39.5	5.3	M-H, M+FA-H	C24H40O5	-2.65326	0.00265642	0.0414792	-4.35986	0.0487027	6.87352	141.132	6.29043	27.6637	1.22957e-06	5.89444	1.22957e-06	1.39259	235.955	244.814	110.125	80.1609	44.7937	130.946
12.55_383.3673m/z	383.367	12.5492	pos	Campesterol	HMDB0002869	Lipids and lipid-like molecules	Steroids and steroid derivatives	Ergostane steroids	C01789	38.2	5.88	M+H-H2O	C28H48O	0.0684167	2.90069e-07	0.0020473	-1.5396	0.343981	6.89678	20.0499	8.94829	4.76786	9.38581	6.16349	7.51626	4.59899	20.8907	21.6443	21.4687	19.9478	17.0472	19.3007
6.34_359.2219m/z	359.222	6.33542	neg	Progesterone	HMDB0001830	Lipids and lipid-like molecules	Steroids and steroid derivatives	Pregnane steroids	C00410	37.5	2.9	M+FA-H	C21H30O2	-2.7065	0.00024145	0.0242267	-2.81262	0.142337	14.6767	103.112	3.59485	15.1933	17.2437	3.85567	20.7065	27.4661	114.564	106.003	148.157	133.536	61.5129	54.9009
4.86_377.2327m/z	377.233	4.85857	neg	17a-Hydroxypregnenolone	HMDB0000363	Lipids and lipid-like molecules	Steroids and steroid derivatives	Pregnane steroids	C05138	36	0.468	M+FA-H	C21H32O3	-1.80768	0.000229794	0.0240702	-2.33515	0.198175	3.40563	17.185	1.22957e-06	3.22681	5.7954	2.06265	4.5717	4.77725	18.6287	20.4204	25.9063	15.4467	11.5019	11.2059
4.31_585.2703m/z	585.27	4.31417	pos	Bilirubin	HMDB0000054	Organoheterocyclic compounds	Tetrapyrroles and derivatives	Bilirubins	C00486	44.9	38.8	M+H	C33H36N4O6	-0.704273	9.08282e-05	0.0154474	-3.10499	0.116226	3.76432	32.3879	4.38619	8.72152	5.64014	0.582683	1.22957e-06	3.25537	44.4007	27.7453	43.8744	36.1645	20.3617	21.7807
3.07_157.0867m/z	157.087	3.06582	neg	trans-4-Hydroxycyclohexylacetic acid	HMDB0000909	Organic oxygen compounds	Organooxygen compounds	Alcohols and polyols		39	6.74	M-H	C8H14O3	-2.32063	0.00259909	0.0411771	2.28265	4.86571	3.06924	0.630789	2.30535	5.80011	2.85176	2.67712	2.33473	2.44635	0.456275	1.72828	1.22957e-06	0.820239	1.22957e-06	0.779939
3.01_143.0712m/z	143.071	3.00782	neg	4-Hydroxycyclohexylcarboxylic acid	HMDB0001988	Organic oxygen compounds	Organooxygen compounds	Alcohols and polyols		48	44.7	M-H	C7H12O3	-1.30852	0.0182934	0.0719704	6.08808	68.0291	92.0426	1.35299	23.0454	57.0359	88.8964	212.848	12.9876	157.442	2.10486	0.953516	2.30615	0.113335	0.7787	1.86137
4.02_159.1013m/z	159.101	4.02002	pos	cis-4-Hydroxycyclohexylacetic acid	HMDB0000451	Organic oxygen compounds	Organooxygen compounds	Alcohols and polyols		45.7	34	M+H	C8H14O3	-1.9501	0.0406969	0.104889	22.0953	4.48077e+06	5.5094	1.22957e-06	1.22957e-06	2.54956	6.35549	14.1479	1.22957e-06	10.0034	1.22957e-06	1.22957e-06	1.22957e-06	1.22957e-06	1.22957e-06	1.22957e-06
3.93_243.1339m/z	243.134	3.92818	pos	Isoleucyl-Glutamate	HMDB0028906	Organic acids and derivatives	Carboxylic acids and derivatives	Amino acids, peptides, and analogues		42.2	12.4	M+H-H2O	C11H20N2O5	-0.182926	0.00212244	0.0392069	1.05626	2.07954	271.452	130.535	283.429	307.731	284.635	257.461	312.551	182.904	122.019	106.951	64.673	179.497	67.274	242.795
4.21_775.6783m/z	775.678	4.21025	neg	Thyroxine	HMDB0000248	Organic acids and derivatives	Carboxylic acids and derivatives	Amino acids, peptides, and analogues	C01829	41	11	M-H	C15H11I4NO4	-1.50999	0.00161461	0.0370653	3.66871	12.7172	89.5526	7.04182	68.1481	172.507	36.3456	86.3987	65.2246	108.691	7.38548	7.15182	6.63775	6.95096	9.98565	4.13926
7.45_114.0911m/z	114.091	7.44802	pos	L-Isoleucine	HMDB0000172	Organic acids and derivatives	Carboxylic acids and derivatives	Amino acids, peptides, and analogues	C00407	38.1	0	M+H-H2O	C6H13NO2	-2.10943	0.00673748	0.0503208	3.94489	15.4004	18.5185	1.20247	7.84169	32.2047	35.5243	6.91675	13.3586	15.2649	1.44614	1.39775	1.22957e-06	1.22957e-06	1.22957e-06	4.37092
0.91_116.0701m/z	116.07	0.9135	pos	D-Proline	HMDB0003411	Organic acids and derivatives	Carboxylic acids and derivatives	Amino acids, peptides, and analogues	C00763	38.8	1.67	M+H	C5H9NO2	-4.25982	0.0273528	0.084972	6.11701	69.4071	19.7632	0.284743	4.35071	27.6641	49.1954	4.89301	4.08031	28.3957	0.695795	0.144941	0.118648	0.546423	1.22957e-06	0.202651
3.45_371.1528m/z	371.153	3.44947	neg	Tryptophyl-Tryptophan	HMDB0029094	Organic acids and derivatives	Carboxylic acids and derivatives	Amino acids, peptides, and analogues		38.1	5.82	M-H2O-H	C22H22N4O3	3.59319	0.0268401	0.0843085	24.4457	2.28498e+07	28.0953	1.22957e-06	4.40349	16.5012	40.6002	73.8557	4.0855	29.1259	1.22957e-06	1.22957e-06	1.22957e-06	1.22957e-06	1.22957e-06	1.22957e-06
3.29_305.2108m/z	305.211	3.29122	pos	7a-Hydroxydehydroepiandrosterone	HMDB0004611	Lipids and lipid-like molecules	Steroids and steroid derivatives	Androstane steroids	C18045	37.7	6.95	M+H	C19H28O3	-0.97977	6.51365e-05	0.0137893	2.36988	5.16897	38.807	7.5077	30.9879	36.6603	53.4364	34.1791	25.1329	52.4456	8.98807	8.05502	4.92827	6.88906	9.00988	7.17588
4.21_329.1757m/z	329.176	4.21025	neg	Boldione	HMDB0003422	Lipids and lipid-like molecules	Steroids and steroid derivatives	Androstane steroids	C20144	38.8	2.76	M+FA-H	C19H24O2	-0.492486	0.021022	0.0760019	22.5855	6.29396e+06	7.73885	1.22957e-06	0.928074	5.20822	19.054	13.0611	5.58632	2.59533	1.22957e-06	1.22957e-06	1.22957e-06	1.22957e-06	1.22957e-06	1.22957e-06
1.91_275.0228m/z	275.023	1.90787	neg	Dihydroferulic acid 4-sulfate	HMDB0041724	Organic acids and derivatives	Organic sulfuric acids and derivatives	Arylsulfates		42.5	17.5	M-H	C10H12O7S	-1.03793	0.0171278	0.0699547	2.63469	6.21041	50.1971	8.08273	31.4949	23.9676	102.757	15.5144	40.8146	86.6343	4.36354	16.6654	8.60203	5.20715	9.44473	4.21359
0.55_335.0440m/z	335.044	0.549433	neg	4-Hydroxy-5-(dihydroxyphenyl)-valeric acid-O-methyl-O-sulphate	HMDB0059977	Benzenoids	Phenols	Benzenediols		36.2	0	M-H	C12H16O9S	-0.592577	0.0106688	0.0583949	1.03731	2.0524	6.60225	3.21684	2.75509	9.9304	6.98459	7.27066	7.32934	5.34343	3.55385	3.82361	1.22288	4.59672	3.23841	2.86561
1.81_305.0333m/z	305.033	1.8082	neg	4-Hydroxy-5-(dihydroxyphenyl)-valeric acid-O-sulphate	HMDB0059978	Benzenoids	Phenols	Benzenediols		44.1	32	M-H	C11H14O8S	-1.32024	0.00635005	0.0496674	5.21538	37.1523	6.27772	0.168973	6.34478	7.40755	11.0436	0.0585965	2.42767	10.3841	1.22957e-06	0.519853	1.22957e-06	1.22957e-06	1.22957e-06	0.493978
6.48_167.0338m/z	167.034	6.47772	pos	Terephthalic acid	HMDB0002428	Benzenoids	Benzene and substituted derivatives	Benzoic acids and derivatives	C06337	54	77.9	M+H	C8H6O4	-0.421678	8.11279e-05	0.0150041	1.04592	2.06468	422.186	204.48	430.241	436.279	550.457	383.056	411.555	321.532	216.484	232.997	148.835	183.747	248.814	196.004
7.20_480.3082m/z	480.308	7.20035	pos	2,3-Diaminosalicylic acid	HMDB0013159	Benzenoids	Benzene and substituted derivatives	Benzoic acids and derivatives		42.5	18.9	M+K	C25H47NO5	-0.827171	0.00166184	0.0370653	1.07006	2.09952	2560.77	1219.69	2361.23	3051.33	3665.67	2418.83	2173.56	1694.03	1246.14	1514.57	996.584	1185.97	735.093	1639.81
0.91_136.0387m/z	136.039	0.9135	pos	3-Aminosalicylic acid	HMDB0001972	Benzenoids	Benzene and substituted derivatives	Benzoic acids and derivatives		44	32.8	M+H-H2O	C7H7NO3	-3.70089	0.0042353	0.0445827	1.07271	2.10338	19.1144	9.08748	24.6995	19.7294	16.0075	10.2135	26.9785	17.058	10.3539	12.7666	7.18536	10.6845	5.36547	8.16912
5.86_195.1015m/z	195.101	5.85658	pos	Butylparaben	HMDB0032575	Benzenoids	Benzene and substituted derivatives	Benzoic acids and derivatives		52.1	68.6	M+H	C11H14O3	-0.607189	0.0310033	0.0901799	1.25202	2.38175	16.0812	6.75185	8.55753	31.015	20.6841	8.54369	14.3943	13.2928	8.43318	5.98792	3.73741	7.10846	3.58243	11.6617
2.49_116.0501m/z	116.05	2.49233	neg	Benzeneacetonitrile	HMDB0034171	Benzenoids	Benzene and substituted derivatives	Benzyl cyanides	C16074	37.3	0	M-H	C8H7N	-4.05683	0.0242994	0.0805758	1.38079	2.6041	2.11332	0.811537	3.13167	1.80247	1.30477	1.2643	1.69464	3.48209	1.41791	0.755323	0.169701	0.618406	1.22957e-06	1.90788
6.87_424.3442m/z	424.344	6.8697	pos	trans-2-Tetradecenoylcarnitine	HMDB0013329	Organic acids and derivatives	Hydroxy acids and derivatives	Beta hydroxy acids and derivatives		38.8	20.9	M+H-H2O	C25H47NO5	4.63664	0.0361393	0.0978409	2.96203	7.79219	161.466	20.7215	77.6262	84.3845	438.482	113.609	71.8221	182.872	2.12956	15.3075	13.9642	19.7253	45.5519	27.6505
8.09_415.3204m/z	415.32	8.09032	pos	3beta,7alpha-Dihydroxy-5-cholestenoate	HMDB0012454	Lipids and lipid-like molecules	Steroids and steroid derivatives	Bile acids, alcohols and derivatives	C17335	40.4	15.1	M+H-H2O	C27H44O4	-0.664986	0.0103811	0.0579515	1.56841	2.96578	129.868	43.789	62.5718	201.73	184.398	88.3544	85.6726	156.483	75.5927	26.8115	9.95015	37.0186	20.8538	92.5072
7.52_454.3884m/z	454.388	7.52302	pos	27-Deoxy-5b-cyprinol	HMDB0001231	Lipids and lipid-like molecules	Steroids and steroid derivatives	Bile acids, alcohols and derivatives	C05446	37.8	0.305	M+NH4	C27H48O4	-1.68213	0.00640167	0.0496674	1.97915	3.9426	199.692	50.6497	157.574	382.864	253.42	99.2673	167.683	137.341	94.5358	52.7867	25.5192	34.8358	32.3632	63.8576
8.51_399.3258m/z	399.326	8.50963	pos	7 alpha,26-Dihydroxy-4-cholesten-3-one	HMDB0012459	Lipids and lipid-like molecules	Steroids and steroid derivatives	Bile acids, alcohols and derivatives	C17336	46.6	39.6	M+H-H2O	C27H44O3	0.0813992	0.0145282	0.0657731	2.2052	4.61139	597.619	129.596	351.881	692.624	1281.4	253.341	326.033	680.433	196.6	110.394	57.9553	98.8529	100.157	213.619
7.40_413.3046m/z	413.305	7.40252	pos	7alpha-Hydroxy-3-oxo-4-cholestenoate	HMDB0012458	Lipids and lipid-like molecules	Steroids and steroid derivatives	Bile acids, alcohols and derivatives	C17337	40	8.86	M+H-H2O	C27H42O4	-1.05929	0.000119024	0.0175014	24.8911	3.1114e+07	38.2567	1.22957e-06	20.954	45.9758	55.4344	17.241	46.1004	43.8349	1.22957e-06	1.22957e-06	1.22957e-06	1.22957e-06	1.22957e-06	1.22957e-06
7.99_563.2301m/z	563.23	7.99057	neg	Biliverdin	HMDB0001008	Organoheterocyclic compounds	Tetrapyrroles and derivatives	Bilirubins	C00500	36.2	4.53	M-H2O-H	C33H34N4O6	0.163606	0.000767195	0.033524	1.62718	3.08908	9.85256	3.18948	7.97885	12.318	11.3721	5.56663	14.0553	7.82443	3.65562	4.36622	2.41973	4.07237	1.26377	3.35915
1.06_159.0297m/z	159.03	1.0589	neg	Gluconolactone	HMDB0000150	Organic oxygen compounds	Organooxygen compounds	Carbohydrates and carbohydrate conjugates	C00198	43.2	24.3	M-H2O-H	C6H10O6	-0.992332	0.00234691	0.0402638	1.00541	2.00751	9.44918	4.70692	9.61373	8.87668	12.566	5.62709	8.67871	11.3329	5.87967	7.05747	3.1681	3.87033	5.08484	3.1811
8.19_463.1306m/z	463.131	8.19132	pos	N,N'-diacetylchitobiose	HMDB0062702	Organic oxygen compounds	Organooxygen compounds	Carbohydrates and carbohydrate conjugates	C01674	39.7	15.1	M+K	C16H28N2O11	-4.34981	0.00762804	0.0523334	1.24449	2.36935	102.244	43.1528	81.2443	155.464	105.491	62.5992	74.1454	134.52	31.3436	40.7054	21.056	46.0712	31.9143	87.8264
0.62_195.0509m/z	195.051	0.624933	neg	D-Ribose	HMDB0000283	Organic oxygen compounds	Organooxygen compounds	Carbohydrates and carbohydrate conjugates	C00121	39.9	6.86	M+FA-H	C5H10O5	-0.590819	0.00138138	0.0369311	1.42073	2.67721	41.8332	15.6257	21.1627	55.5779	58.7342	43.9366	32.584	39.004	15.021	12.2847	14.7193	16.8149	22.6859	12.2284
3.79_468.2650m/z	468.265	3.78968	pos	Tobramycin	HMDB0014822	Organic oxygen compounds	Organooxygen compounds	Carbohydrates and carbohydrate conjugates	C00397	36.8	0	M+H	C18H37N5O9	-3.00125	0.0135449	0.0641894	1.52284	2.87357	12.2408	4.25979	19.166	15.1872	14.4063	10.6118	9.31702	4.75654	10.7789	2.05925	0.284449	2.402	2.07776	7.95633
3.65_458.1659m/z	458.166	3.65453	pos	Amygdalin	HMDB0035030	Organic oxygen compounds	Organooxygen compounds	Carbohydrates and carbohydrate conjugates	C08325	49.2	53	M+H	C20H27NO11	0.511493	0.00834712	0.0540495	25.4169	4.47976e+07	55.0817	1.22957e-06	16.9558	48.6239	68.637	111.41	1.75153	83.1115	1.22957e-06	1.22957e-06	1.22957e-06	1.22957e-06	1.22957e-06	1.22957e-06
5.88_283.1912m/z	283.191	5.87768	neg	2,3-Octanedione	HMDB0031293	Organic oxygen compounds	Organooxygen compounds	Carbonyl compounds		39.6	0.108	2M-H	C8H14O2	-1.15127	0.0219462	0.0772327	3.24973	9.51185	63.0079	6.62414	20.6731	82.4996	110.708	128.348	23.9222	11.8953	15.903	6.4526	2.81363	2.57843	3.28137	8.71581
3.01_99.0812m/z	99.0812	3.00782	neg	Methyl isobutyl ketone	HMDB0002939	Organic oxygen compounds	Organooxygen compounds	Carbonyl compounds	C19263	41	15.4	M-H	C6H12O	-3.23062	0.0299547	0.0884995	23.337	1.05962e+07	13.0287	1.22957e-06	1.71785	5.67672	13.861	31.1299	0.930157	24.8565	1.22957e-06	1.22957e-06	1.22957e-06	1.22957e-06	1.22957e-06	1.22957e-06
5.98_283.1914m/z	283.191	5.98183	neg	Methyl cyclohexanecarboxylate	HMDB0031343	Organic acids and derivatives	Carboxylic acids and derivatives	Carboxylic acid derivatives		38.1	0	2M-H	C8H14O2	-0.396526	0.0274721	0.0850803	5.38525	41.7948	5.93568	0.14202	1.87572	10.0168	11.7946	10.8685	1.05856	1.22957e-06	0.852112	1.22957e-06	1.22957e-06	1.22957e-06	1.22957e-06	1.22957e-06
9.73_401.3405m/z	401.34	9.73207	pos	7a-Hydroxy-cholestene-3-one	HMDB0001993	Lipids and lipid-like molecules	Steroids and steroid derivatives	Cholestane steroids	C05455	38	0	M+H	C27H44O2	-2.35309	0.0296494	0.0880378	3.46199	11.0195	3.5234	0.319742	3.51005	9.31146	1.83643	1.31553	1.14064	4.02628	0.405998	0.543618	1.22957e-06	0.968833	1.22957e-06	1.22957e-06
3.32_193.0351m/z	193.035	3.3178	neg	D-Xylono-1,5-lactone	HMDB0011676	Organoheterocyclic compounds	Lactones	Delta valerolactones	C02266	38.2	0	M+FA-H	C5H8O5	-1.98973	0.0244566	0.0807208	3.03885	8.21838	3.48128	0.423597	6.01382	0.883036	2.79626	7.49034	2.98478	0.719435	1.22957e-06	1.22957e-06	1.22957e-06	0.876975	1.22957e-06	1.6646
5.97_400.0062m/z	400.006	5.96683	neg	3-Iodothyronamine	HMDB0060524	Benzenoids	Benzene and substituted derivatives	Diphenylethers		36.3	0	M+FA-H	C14H14INO2	3.00272	0.039411	0.102886	1.26981	2.41131	4.61445	1.91367	4.39206	5.1546	8.84775	3.8251	3.58629	2.83416	2.68743	3.14195	0.550448	0.832766	3.31616	1.22957e-06
7.58_388.2695m/z	388.269	7.58117	pos	6-Keto-prostaglandin F1a	HMDB0002886	Lipids and lipid-like molecules	Fatty Acyls	Eicosanoids	C05961	37.5	0.0376	M+NH4	C20H34O6	0.234898	0.0129444	0.0628987	2.22564	4.67719	30.3899	6.49747	13.6327	56.215	49.1158	11.4436	31.3944	20.5377	7.47536	12.0419	1.22957e-06	4.79288	2.50024	12.1744
4.08_499.2838m/z	499.284	4.08117	pos	N-Acetyl-leukotriene E4	HMDB0005084	Lipids and lipid-like molecules	Fatty Acyls	Eicosanoids	C11361	40.1	9.29	M+NH4	C25H39NO6S	0.351369	0.00531018	0.0476835	2.24735	4.7481	81.0008	17.0596	48.2612	91.4354	133.649	128.844	38.672	45.1432	23.4237	13.8315	8.58249	9.63727	13.9472	32.9355
7.87_225.1860m/z	225.186	7.8692	neg	Myristoleic acid	HMDB0002000	Lipids and lipid-like molecules	Fatty Acyls	Fatty acids and conjugates	C08322	40.4	4.37	M-H	C14H26O2	-0.184269	0.000337369	0.0290384	1.22241	2.33337	104.074	44.6024	88.7463	135.959	131.139	85.3799	93.6725	89.5455	50.2333	62.3595	33.8635	38.7882	58.1482	24.2219
3.52_229.1434m/z	229.143	3.52287	pos	Traumatic acid	HMDB0000933	Lipids and lipid-like molecules	Fatty Acyls	Fatty acids and conjugates	C16308	38.2	3.34	M+H	C12H20O4	-0.229017	0.00148	0.0370653	1.3678	2.58077	45.8846	17.7794	41.8497	55.8232	56.7414	61.8358	33.5009	25.5567	28.0856	14.7438	16.1794	19.9713	8.65791	19.0385
2.46_217.1087m/z	217.109	2.46383	neg	9-Oxo-nonanoic acid	HMDB0094711	Lipids and lipid-like molecules	Fatty Acyls	Fatty acids and conjugates	C16322	50	63.7	M+FA-H	C9H16O3	3.11959	0.0300087	0.0885458	1.4277	2.69017	15.0189	5.58289	5.28881	22.0052	24.242	20.1701	12.2588	6.14869	4.69605	9.8166	1.43789	2.31686	10.9315	4.2985
8.57_254.2249n	255.232	8.56713	pos	Palmitoleic acid	HMDB0003229	Lipids and lipid-like molecules	Fatty Acyls	Fatty acids and conjugates	C08362	45.7	39.7	M+H-H2O, M+H	C16H30O2	1.30414	0.00963557	0.0568051	1.48798	2.80495	421.177	150.155	337.837	452.896	797.215	238.564	361.805	338.744	69.1703	237.358	68.5054	164.915	165.009	195.97
3.91_544.2903m/z	544.29	3.91285	pos	Ganosporeric acid A	HMDB0033022	Lipids and lipid-like molecules	Fatty Acyls	Fatty acids and conjugates	C16526	38	0	M+NH4	C30H38O8	-0.292907	0.00431215	0.0447274	1.73038	3.31815	22.9621	6.92015	22.9733	22.3876	26.4238	6.80221	33.7343	25.4513	8.95342	4.49318	0.454013	10.1855	1.35774	16.0771
6.75_271.2276m/z	271.228	6.7548	neg	Pentadecanal	HMDB0031078	Lipids and lipid-like molecules	Fatty Acyls	Fatty aldehydes	C01948	39	4.27	M+FA-H	C15H30O	-1.29345	0.0248297	0.0814538	1.54855	2.92523	57.8868	19.7888	51.9536	39.5334	121.692	70.9747	29.4682	33.6993	17.7272	31.2822	14.2905	18.0385	12.4024	24.9921
7.23_744.5176m/z	744.518	7.23095	neg	PE(16:1(9Z)/P-18:1(11Z))	HMDB0008984	Lipids and lipid-like molecules	Glycerophospholipids	Glycerophosphoethanolamines	C00350	36.4	3.37	M+FA-H	C39H74NO7P	-1.34331	0.00412256	0.0443988	3.25338	9.53599	67.1792	7.0448	65.7364	93.4669	125.72	65.1408	17.4249	35.5857	1.22957e-06	9.1055	1.22957e-06	16.2504	16.9129	1.22957e-06
1.22_235.0822m/z	235.082	1.21807	neg	Galactosylglycerol	HMDB0006790	Lipids and lipid-like molecules	Glycerolipids	Glycosylglycerols	C05401	43	17.2	M-H2O-H	C9H18O8	-0.323035	0.02696	0.084458	2.16205	4.47549	66.7841	14.9222	58.5877	35.5799	68.468	162.785	32.7899	42.494	15.5056	11.6005	16.9712	17.4759	13.171	14.8088
5.36_368.2795m/z	368.28	5.36362	pos	Tetrahydrocorticosterone	HMDB0000268	Lipids and lipid-like molecules	Steroids and steroid derivatives	Hydroxysteroids	C05476	38.7	2.48	M+NH4	C21H34O4	-0.0651088	0.0318483	0.0916035	1.19069	2.28262	63.0415	27.618	37.5466	102.714	108.458	58.9164	32.1557	38.4595	36.0253	21.4047	30.1372	19.4223	31.4117	27.3071
4.19_347.2217m/z	347.222	4.18933	pos	11b,17a,21-Trihydroxypreg-nenolone	HMDB0006760	Lipids and lipid-like molecules	Steroids and steroid derivatives	Hydroxysteroids	C05489	44.1	22.9	M+H-H2O	C21H32O5	-0.0118274	0.0445845	0.110413	1.29806	2.45897	355.195	144.448	345.529	378.106	714.571	134.439	166.341	392.182	147.062	122.003	170.342	293.616	96.9801	36.6872
3.84_365.2326m/z	365.233	3.8416	neg	Cortolone	HMDB0003128	Lipids and lipid-like molecules	Steroids and steroid derivatives	Hydroxysteroids	C05481	42.8	18.5	M-H	C21H34O5	-1.96066	0.00523732	0.0475168	1.87632	3.67137	193.623	52.7385	285.52	142.095	294.83	244.244	66.5931	128.454	68.1155	24.783	63.2122	28.4642	85.9377	45.9186
3.65_393.2273m/z	393.227	3.65295	neg	3a,21-Dihydroxy-5b-pregnane-11,20-dione	HMDB0006755	Lipids and lipid-like molecules	Steroids and steroid derivatives	Hydroxysteroids	C05478	38.5	0	M+FA-H	C21H32O4	-2.6414	0.00415447	0.0443988	1.96352	3.90012	55.0761	14.1216	21.1027	48.3217	92.3248	57.5402	64.6804	46.487	5.49293	6.77143	36.3163	25.836	7.45447	2.85877
3.85_363.2167m/z	363.217	3.85102	pos	18-Hydroxycorticosterone	HMDB0000319	Lipids and lipid-like molecules	Steroids and steroid derivatives	Hydroxysteroids	C01124	42.3	15.7	M+H	C21H30O5	0.185696	0.0263343	0.0836677	2.71209	6.55269	103.732	15.8305	35.0412	64.6898	254.461	139.128	82.3885	46.6855	12.0861	10.0305	29.3786	13.05	11.0567	19.3809
4.00_345.2059m/z	345.206	4.00468	pos	Cortisol	HMDB0000063	Lipids and lipid-like molecules	Steroids and steroid derivatives	Hydroxysteroids	C00735	44.1	23.9	M+H-H2O	C21H30O5	-0.485709	9.78503e-07	0.00207687	3.83432	14.2641	61.3486	4.30091	40.6408	73.9186	65.2043	60.2294	75.1948	52.9035	5.60653	3.32155	3.30808	3.92679	2.77954	6.86296
4.00_389.1961m/z	389.196	4.0021	neg	11-Dehydrocorticosterone	HMDB0004029	Lipids and lipid-like molecules	Steroids and steroid derivatives	Hydroxysteroids	C05490	39	1.36	M+FA-H	C21H28O4	-2.48508	7.60556e-06	0.00511239	3.87533	14.6754	31.0644	2.11677	15.4138	28.7978	35.7646	37.5704	37.0555	31.7842	2.95442	0.98865	2.3886	1.6669	1.2501	3.45193
2.35_409.2221m/z	409.222	2.34918	neg	Dihydrocortisol	HMDB0003259	Lipids and lipid-like molecules	Steroids and steroid derivatives	Hydroxysteroids	C05471	38.2	0	M+FA-H	C21H32O5	-2.87591	0.00238737	0.0402638	7.19092	146.111	23.2124	0.158868	9.88189	12.0113	48.2604	18.2099	28.0791	22.8319	1.22957e-06	1.22957e-06	1.22957e-06	0.953201	1.22957e-06	1.22957e-06
4.53_345.2070m/z	345.207	4.53307	neg	Corticosterone	HMDB0001547	Lipids and lipid-like molecules	Steroids and steroid derivatives	Hydroxysteroids	C02140	39.2	10.7	M-H	C21H30O4	-0.528259	0.0335128	0.0938705	7.71358	209.903	22.8617	0.108915	9.75205	17.8929	68.3404	8.26035	16.7055	16.219	1.22957e-06	1.22957e-06	0.653486	1.22957e-06	1.22957e-06	1.22957e-06
1.86_407.2208m/z	407.221	1.85645	pos	Cortol	HMDB0003180	Lipids and lipid-like molecules	Steroids and steroid derivatives	Hydroxysteroids	C05482	39.2	3.71	M+K	C21H36O5	3.78163	0.000282972	0.0266296	8.57881	382.367	87.0668	0.227705	96.013	98.6506	131.313	19.8337	66.6642	109.926	0.209213	1.22957e-06	1.22957e-06	0.212283	0.767021	0.177709
4.50_186.0910m/z	186.091	4.50265	pos	3-Indolebutyric acid	HMDB0002096	Organoheterocyclic compounds	Indoles and derivatives	Indoles	C11284	41	14	M+H-H2O	C12H13NO2	-1.51257	0.00576949	0.0487125	1.69962	3.24815	17.339	5.33811	11.5792	23.5178	20.392	6.56455	26.2597	15.7208	13.0218	3.38289	4.91961	4.63843	2.53559	3.5303
2.44_249.0880m/z	249.088	2.43517	neg	(±)-Tryptophan	HMDB0030396	Organoheterocyclic compounds	Indoles and derivatives	Indolyl carboxylic acids and derivatives	C00806	38.2	1.66	M+FA-H	C11H12N2O2	-0.20332	0.0115263	0.0601173	1.43077	2.69591	16.3479	6.06397	18.9625	25.6207	7.86955	8.19626	24.91	12.5285	3.63917	6.89856	7.92179	7.58589	5.49041	4.84798
12.38_616.5054n	634.54	12.3776	pos	DG(18:2(9Z,12Z)/18:2(9Z,12Z)/0:0)	HMDB0007248	Lipids and lipid-like molecules	Fatty Acyls	Lineolic acids and derivatives	C00165	40.8	9.54	M+H-H2O, M+H, M+Na, M+NH4	C39H68O5	-2.13983	0.0410832	0.105308	1.12393	2.1794	92.0535	42.2379	166.374	137.164	86.0338	54.5599	62.0496	46.1393	74.0442	47.1454	29.5906	43.9073	26.5904	32.1497
7.89_419.2427m/z	419.243	7.88873	neg	Jasmonic acid	HMDB0032797	Lipids and lipid-like molecules	Fatty Acyls	Lineolic acids and derivatives	C08491	38.1	0.22	2M-H	C12H18O3	-2.90145	0.0155233	0.0673979	1.25021	2.37876	28.7036	12.0666	49.1181	37.4487	21.0691	17.4625	32.2931	14.8298	16.5429	13.5142	10.9118	13.7645	3.88215	13.7843
3.71_269.1397m/z	269.14	3.71128	neg	Methyl jasmonate	HMDB0036583	Lipids and lipid-like molecules	Fatty Acyls	Lineolic acids and derivatives	C11512	39.1	11.1	M+FA-H	C13H20O3	1.22854	0.0258002	0.0828865	1.29556	2.45472	3.18627	1.29802	3.36132	3.19121	3.78139	4.43539	2.31846	2.02984	1.67103	2.73508	1.22957e-06	1.22957e-06	3.38198	1.22957e-06
13.41_592.5058n	575.502	13.4134	pos	DG(16:0/18:2(9Z,12Z)/0:0)	HMDB0007103	Lipids and lipid-like molecules	Fatty Acyls	Lineolic acids and derivatives	C00165	40.8	16.9	M+H-H2O, M+NH4	C37H68O5	-1.53219	0.0136381	0.0642187	1.94598	3.85301	76.4957	19.8535	114.521	149.531	59.9123	61.9131	33.743	39.3534	23.8855	27.3978	8.71654	20.0894	11.9844	27.0474
12.33_590.4894n	573.486	12.3341	pos	DG(16:1(9Z)/18:2(9Z,12Z)/0:0)	HMDB0007132	Lipids and lipid-like molecules	Fatty Acyls	Lineolic acids and derivatives	C00165	40.9	10.9	M+H-H2O, M+NH4, M+H	C37H66O5	-2.795	0.021066	0.0760128	3.43338	10.8032	10.1233	0.937072	21.9752	14.8049	13.209	8.49065	1.84163	0.418642	1.64541	0.949548	0.533378	1.51853	0.668129	0.30743
7.13_260.1768n	299.163	7.12703	pos	2-Polyprenyl-6-methoxyphenol	HMDB0060355	Lipids and lipid-like molecules	Prenol lipids	Monoterpenoids	C17552	36	0	M+NH4, M+K	C17H24O2	-3.3429	0.0406603	0.104871	4.28015	19.4292	55.3578	2.84921	26.2036	151.316	86.2836	10.4171	44.4288	13.4977	7.23452	1.22957e-06	1.22957e-06	8.34896	1.22957e-06	1.51178
2.97_167.1064m/z	167.106	2.9714	pos	Perillic acid	HMDB0004586	Lipids and lipid-like molecules	Prenol lipids	Monoterpenoids	C11924	46.5	36	M+H	C10H14O2	-1.33299	0.00307768	0.0428124	28.4224	3.59756e+08	442.344	1.22957e-06	163.956	355.12	658.568	814.9	112.681	548.837	1.22957e-06	1.22957e-06	1.22957e-06	1.22957e-06	1.22957e-06	1.22957e-06
6.77_504.3075m/z	504.308	6.76722	pos	LysoSM(d18:1)	HMDB0006482	Lipids and lipid-like molecules	Sphingolipids	Phosphosphingolipids	C03640	36.8	0	M+K	C23H50N2O5P+	-2.97756	0.0425611	0.107475	1.10523	2.15133	37.6296	17.4913	32.966	55.7308	63.9622	16.6529	33.855	22.6105	9.25982	29.2847	10.8758	16.6879	7.72791	31.1118
5.98_380.2559m/z	380.256	5.98275	pos	Sphingosine 1-phosphate	HMDB0000277	Lipids and lipid-like molecules	Sphingolipids	Phosphosphingolipids	C06124	49.6	56.7	M+H	C18H38NO5P	-0.435029	0.000341936	0.0292293	1.29244	2.44941	437.007	178.413	450.267	538.445	592.387	289.317	372.965	378.66	200.445	197.99	153.153	184.162	115.393	219.334
6.19_382.2714m/z	382.271	6.18723	pos	Sphinganine 1-phosphate	HMDB0001383	Lipids and lipid-like molecules	Sphingolipids	Phosphosphingolipids	C01120	44.8	33.2	M+H	C18H40NO5P	-0.625125	0.000846405	0.033524	1.88434	3.69184	141.343	38.2851	141.373	166.66	229.797	92.183	108.514	109.529	67.2505	32.0767	31.2959	40.7268	15.4427	42.9182
3.73_857.6737m/z	857.674	3.72562	neg	SM(d18:1/24:1(15Z))	HMDB0012107	Lipids and lipid-like molecules	Sphingolipids	Phosphosphingolipids	C00550	43.1	23	M+FA-H	C47H93N2O6P	-1.94987	3.26996e-05	0.0105279	2.86512	7.28595	845.833	116.091	611.25	867.565	870.628	863.452	963.803	898.303	5.18909	0.086809	1.22957e-06	1.22957e-06	139.299	551.971
0.91_153.0655m/z	153.066	0.9135	pos	N1-Methyl-2-pyridone-5-carboxamide	HMDB0004193	Organoheterocyclic compounds	Pyridines and derivatives	Pyridinecarboxylic acids and derivatives	C05842	48.7	48.4	M+H	C7H8N2O2	-2.22616	0.00256318	0.040896	1.15771	2.23102	64.7918	29.0413	79.7881	70.7908	60.5846	32.5971	91.2301	53.7602	32.9706	39.3293	23.6016	29.9236	18.066	30.3568
1.16_242.0903n	265.08	1.16348	pos	Thymidine	HMDB0000273	Nucleosides, nucleotides, and analogues	Pyrimidine nucleosides	Pyrimidine 2'-deoxyribonucleosides	C00214	54.5	78.4	M+H, M+Na	C10H14N2O5	0.177724	0.000546285	0.0313089	1.14832	2.21656	12.164	5.48781	10.6357	13.8647	11.2731	9.55226	17.5698	10.0887	6.21175	4.33782	5.62996	7.01673	3.77546	5.95512
3.18_368.0239n	349.006	3.18213	neg	Orotidylic acid	HMDB0000218	Nucleosides, nucleotides, and analogues	Pyrimidine nucleotides	Pyrimidine ribonucleotides	C01103	44	33.6	M-H2O-H, M-H	C10H13N2O11P	-4.82998	0.013632	0.0642187	1.80296	3.48937	48.3838	13.8661	33.8792	70.9804	25.5725	88.0158	16.7175	55.1374	5.90783	21.3223	17.2373	11.2666	11.8066	15.6558
1.16_127.0497m/z	127.05	1.16348	pos	Thymine	HMDB0000262	Organoheterocyclic compounds	Diazines	Pyrimidines and pyrimidine derivatives	C00178	40	7.42	M+H	C5H6N2O2	-4.077	0.000326208	0.0289488	1.08383	2.11966	21.5011	10.1437	16.3551	26.1568	21.3822	18.1632	28.5884	18.3611	10.9925	9.45631	10.1741	11.8975	6.94374	11.3977
3.84_361.2011m/z	361.201	3.8416	neg	4-Hydroxyretinoic acid	HMDB0006254	Lipids and lipid-like molecules	Prenol lipids	Retinoids	C16677	40.9	11.3	M+FA-H	C20H28O3	-2.90596	0.0210234	0.0760019	2.18523	4.548	133.485	29.3503	47.165	69.6116	267.65	226.168	121.467	68.8505	21.7787	15.8547	57.115	23.4753	26.4661	31.4122
3.94_359.1857m/z	359.186	3.9436	neg	4-oxo-Retinoic acid	HMDB0006285	Lipids and lipid-like molecules	Prenol lipids	Retinoids	C16678	38.7	3.29	M+FA-H	C20H26O3	-2.23316	0.0384449	0.101229	2.1929	4.57224	29.8777	6.53459	12.0646	26.3723	71.2788	42.558	10.3003	16.6923	10.9063	4.57277	7.28352	13.0326	3.41229	1.22957e-06
6.78_267.1965m/z	267.197	6.7843	neg	(-)-alpha-Bisabolol	HMDB0036197	Lipids and lipid-like molecules	Prenol lipids	Sesquiterpenoids	C09621	39.9	6.73	M+FA-H	C15H26O	-0.214733	0.0458511	0.112289	1.00274	2.0038	49.2399	24.5733	42.6077	62.5371	83.035	34.7915	44.1575	28.3109	18.0589	42.2331	14.1817	15.4749	49.9412	7.54969
5.43_237.1495m/z	237.15	5.4272	neg	beta-Ionone	HMDB0036565	Lipids and lipid-like molecules	Prenol lipids	Sesquiterpenoids	C12287	38.2	0.906	M+FA-H	C13H20O	-0.605067	0.000980911	0.0344479	2.00958	4.02666	25.3252	6.28938	25.4544	30.1664	40.6632	19.7911	22.1495	13.7267	7.16797	11.2027	3.07562	3.32171	10.7146	2.25366
4.47_465.2487m/z	465.249	4.47423	neg	Etiocholanolone glucuronide	HMDB0004484	Lipids and lipid-like molecules	Steroids and steroid derivatives	Steroidal glycosides	C11136	36.9	1.5	M-H	C25H38O8	-1.40683	8.60958e-05	0.0150041	23.483	1.17241e+07	14.4156	1.22957e-06	6.33157	10.6062	16.2303	17.9185	13.3035	22.1034	1.22957e-06	1.22957e-06	1.22957e-06	1.22957e-06	1.22957e-06	1.22957e-06
0.80_192.0265n	215.016	0.797833	pos	Isocitric acid	HMDB0000193	Organic acids and derivatives	Carboxylic acids and derivatives	Tricarboxylic acids and derivatives	C00311	39.9	7.21	M+NH4, M+Na, M+H, M+H-H2O	C6H8O7	-2.70351	0.00215613	0.0392216	1.05934	2.08397	163.265	78.343	227.396	138.463	210.409	143.243	138.46	121.617	67.8978	56.9977	73.5789	124.137	58.5082	88.938
2.49_569.2644m/z	569.264	2.49233	neg	Morphine	HMDB0014440	Alkaloids and derivatives	Morphinans	Unclassified	C01516	37.9	0	2M-H	C17H19NO3	-2.37598	0.0008419	0.033524	1.13674	2.19884	10.9808	4.99391	14.6104	11.2317	8.75512	12.1689	8.29559	10.8231	8.03349	4.14542	5.3012	1.86187	4.36692	6.25455
0.81_130.0493m/z	130.049	0.813	pos	1-Pyrroline-4-hydroxy-2-carboxylate	HMDB0002234	Organoheterocyclic compounds	Pyrrolines	Unclassified	C04282	40.3	8.63	M+H	C5H7NO3	-4.10273	0.000245828	0.0244374	1.16607	2.244	110.705	49.3337	110.771	121.801	147.315	92.5444	81.2873	110.511	58.4616	31.4739	39.736	71.9269	46.1059	48.2978
8.48_227.2015m/z	227.202	8.48138	neg	1-Tridecene	HMDB0030930	Hydrocarbons	Unsaturated hydrocarbons	Unsaturated aliphatic hydrocarbons		39.3	0	M+FA-H	C13H26	-0.576019	0.00227709	0.0399298	1.49295	2.81463	286.875	101.923	164.506	303.604	465.11	345.32	229.728	212.978	63.7096	123.905	88.6793	93.765	128.497	112.979
