# Supplementary material for: The Aging Features of Thyrotoxicosis Mice: Malnutrition, Immunosenescence and Lipotoxicity
Source: Front Immunol. 2022 Jun 2;13:864929. doi: 10.3389/fimmu.2022.864929 (PMC9201349; doi:10.3389/fimmu.2022.864929)
Supplement: Supplementary file 3 [file Table_3.xlsx]

## Sheet: T-C
ID	m/z	Retention time (min)	Ion mode	Metabolites	Compound ID	Super Class	Class	Sub Class	Adducts	Formula	Score	Fragmentation Score	Mass Error (ppm)	VIP	P-value	adj.P-value	log2(FC)	FC	average(T	average(C)	T1	T2	T3	T4	T5	T6	C1	C2	C3	C4	C5	C6
7.02_991.6712m/z	991.671	7.02222	pos	GM4(d18:1/16:0)	LMSP0601AA01	Lipids and lipid-like molecules	Sphingolipids	Acidic glycosphingolipids	M+H	C51H94N2O16	38.3	2.24	3.58912	21.3838	0.00635566	0.0270357	0.561501	1.4758	151100	102385	139671	186683	184561	138523	136850	120313	108112	108232	81385.7	109107	75083.2	132391
2.67_694.4211m/z	694.421	2.66777	pos	Lipid X	LMSL01020001	Lipids and lipid-like molecules	Saccharolipids	Acylaminosugars	M+H-H2O	C34H66NO12P	41.6	32.4	-11.0256	1.42593	0.00178599	0.0145735	0.604686	1.52065	576.827	379.33	572.852	621.47	500.294	689.51	576.217	500.62	405.271	328.157	327.231	414.253	275.292	525.775
1.75_296.1472n	314.181	1.75147	pos	4-Prenylresveratrol	LMPK13090014	Lipids and lipid-like molecules	Polyketides	Aromatic polyketides	M+H, M+NH4, M+Na	C19H20O3	41	31.1	20.0297	3.85279	0.0143127	0.0427903	0.414652	1.33298	6139.85	4606.12	7198.32	6454.41	5623	5581.11	6623.29	5358.97	5393.69	3783.79	4611.4	4744.66	3120.48	5982.69
1.72_328.2330m/z	328.233	1.72348	pos	Cannabinol	LMPK13120002	Lipids and lipid-like molecules	Polyketides	Aromatic polyketides	M+NH4	C21H26O2	37.4	11.9	19.0152	3.51997	0.000576069	0.0108512	0.461659	1.37712	4139.31	3005.76	3803.88	4289.09	4293.39	4225.91	4430.06	3793.53	3025.17	2769.9	2867.62	3226.6	2341.79	3803.5
2.98_276.1628m/z	276.163	2.98208	pos	3'-O-methylbatatasin III	LMPK13090040	Lipids and lipid-like molecules	Polyketides	Aromatic polyketides	M+NH4	C16H18O3	36.5	3.25	12.949	1.48987	0.006642	0.0276484	27.4705	1.85965e+08	238.72	1.28368e-06	141.709	396.443	460.365	27.7558	112.386	293.66	1.28368e-06	1.28368e-06	1.28368e-06	1.28368e-06	1.28368e-06	1.28368e-06
3.55_519.3066m/z	519.307	3.54772	pos	3alpha,7alpha,12alpha,24-tetrahydroxy-24-methyl-5beta-cholestan-26-oic acid	LMST04040001	Lipids and lipid-like molecules	Sterol Lipids	Bile acids and derivatives	M+K	C28H48O6	39.8	8.87	-3.51052	1.3504	0.00734479	0.0291471	0.526137	1.44007	607.903	422.135	663.717	569.191	572.007	502.324	555.113	785.065	444.836	491.921	249.492	405.531	450.641	490.389
3.19_505.2969m/z	505.297	3.18523	pos	3alpha,7alpha,12alpha,25-Tetrahydroxy-5beta-cholestan-26-oic acid	LMST04030073	Lipids and lipid-like molecules	Sterol Lipids	Bile acids and derivatives	M+K	C27H46O6	42.7	32.7	9.30032	1.1624	0.0490827	0.0997907	0.701148	1.6258	441.951	271.836	527.262	402.481	482.117	482.195	426.445	331.204	356.519	158.792	190.7	273.906	84.4186	566.681
7.52_454.3884m/z	454.388	7.51787	pos	5beta-Cholestane-3alpha,7alpha,24,26-tetrol	LMST04030023	Lipids and lipid-like molecules	Sterol Lipids	Bile acids and derivatives	M+NH4	C27H48O4	38.2	3.88	-1.53501	1.22696	0.00372318	0.020553	2.00272	4.00754	203.635	50.8131	159.955	369.826	264.396	115.928	172.111	139.595	96.8292	52.111	25.3839	34.342	32.2202	63.9921
8.78_628.4986m/z	628.499	8.78397	pos	CerP(d18:1/18:0)	LMSP02050004	Lipids and lipid-like molecules	Sphingolipids	Ceramides	M+H-H2O	C36H72NO6P	37.7	23.8	-12.216	1.62569	0.00507188	0.0239507	0.791596	1.73099	661.157	381.953	491.427	854.38	712.243	726.808	614.745	567.337	452.994	361.703	188.044	404.039	287.039	597.899
8.65_512.5033m/z	512.503	8.65497	pos	Cer(d18:0/14:0)	LMSP02020016	Lipids and lipid-like molecules	Sphingolipids	Ceramides	M+H	C32H65NO3	39.4	7.51	-0.787108	1.21621	0.00955059	0.0336519	0.84073	1.79096	367.344	205.11	431.489	545.181	358.547	288.239	241.882	338.724	228.855	170.046	110.512	289.521	232.456	199.271
13.34_618.5214n	601.518	13.3401	pos	DG(18:1(9Z)/18:2(9Z,12Z)/0:0)[iso2]	LMGL02010056	Lipids and lipid-like molecules	Glycerolipids	Diradylglycerols	M+H-H2O, M+NH4	C39H70O5	40.9	15.3	-1.46874	1.01404	0.000873544	0.0116281	1.96512	3.90444	127.203	32.5789	170.43	196.174	77.3509	130.616	91.1835	97.4607	35.6392	47.8724	15.6605	30.7813	17.7506	47.7696
8.22_342.2044n	343.212	8.222	pos	2,3-Dinor-TXB2	LMFA03030003	Lipids and lipid-like molecules	Fatty Acyls	Eicosanoids	M+H, M+Na	C18H30O6	44.7	26.4	0.51124	1.95856	0.0113493	0.0373697	1.06073	2.08599	829.157	397.489	564.148	1409.67	954.197	768.704	708.908	569.32	405.051	482.354	226.14	403.415	300.157	567.818
3.84_365.2326m/z	365.233	3.8416	neg	20-HETE	LMFA03060009	Lipids and lipid-like molecules	Fatty Acyls	Eicosanoids	M+FA-H	C20H32O3	46.6	38.6	-2.33995	1.08603	0.0070876	0.0286666	1.7975	3.47618	190.251	54.7299	69.4968	148.445	305.587	182.507	301.6	133.87	70.2894	25.4727	65.0324	29.5247	90.4312	47.6289
5.08_609.6097m/z	609.61	5.08315	pos	Hydroxyphthioceranic acid (C40)	LMFA01020326	Lipids and lipid-like molecules	Fatty Acyls	Fatty Acids and Conjugates	M+H	C40H80O3	30.7	0	-13.7074	1.15294	0.0255691	0.0626105	0.320282	1.24857	850.714	681.348	775.728	865.155	918.75	832.415	939.317	772.916	555.086	878.561	482.795	730.974	740.847	699.822
2.20_428.2255n	446.259	2.20012	pos	6-bromo-tricosa-5E,9Z-dienoic acid	LMFA01090101	Lipids and lipid-like molecules	Fatty Acyls	Fatty Acids and Conjugates	M+NH4, M+Na, M+K, M+H	C23H41BrO2	33.4	26.6	-8.19401	5.38529	0.0115615	0.0377886	0.357266	1.281	13668.9	10670.5	16154.5	14622.8	12243.4	13155.7	13362.7	12474.2	12521.3	9358.48	9025.57	11032.8	8898.65	13186.2
6.83_557.3196m/z	557.32	6.8283	neg	29:2(5Z,9Z)(6Br)	LMFA01030891	Lipids and lipid-like molecules	Fatty Acyls	Fatty Acids and Conjugates	M+FA-H	C29H53BrO2	34.8	29.6	-2.98258	2.83038	0.000389748	0.0106012	0.370708	1.29299	3183.66	2462.25	2976	3594.83	3407.76	2989.16	3259.35	2874.83	2343.7	2246.24	2390.18	2445.79	2584.56	2763.02
0.40_217.1794m/z	217.179	0.402167	pos	11R-hydroxy-dodecanoic acid	LMFA01050253	Lipids and lipid-like molecules	Fatty Acyls	Fatty Acids and Conjugates	M+H	C12H24O3	53.2	70.6	-2.15579	2.04825	0.0301154	0.0700849	0.46762	1.38283	1834.71	1326.78	1511.6	2336.09	2301.94	1521.15	1862.78	1474.7	1301.69	1258.15	1026.1	1434.09	1108.1	1832.57
0.98_217.1796m/z	217.18	0.979017	pos	11-hydroxy-dodecanoic acid	LMFA01050165	Lipids and lipid-like molecules	Fatty Acyls	Fatty Acids and Conjugates	M+H	C12H24O3	51.2	58	-1.12207	1.57496	0.0302032	0.0702416	0.475912	1.3908	1077.93	775.048	868.089	1377.89	1352.64	930.426	1086.37	852.189	741.553	778.118	577.88	817.949	654.077	1080.71
13.91_239.1618m/z	239.162	13.9107	pos	9-hydroxy-dodecanoic acid	LMFA01050167	Lipids and lipid-like molecules	Fatty Acyls	Fatty Acids and Conjugates	M+Na	C12H24O3	39.7	1.29	0.0077017	1.81251	0.0105402	0.0356398	0.514947	1.42894	1212.32	848.405	1045.38	1405.24	1535.92	1105.7	1184.71	996.972	851.591	787.555	646.15	932.613	703.954	1168.57
1.44_175.0962m/z	175.096	1.43715	pos	Ethyladipic acid	LMFA01170104	Lipids and lipid-like molecules	Fatty Acyls	Fatty Acids and Conjugates	M+H	C8H14O4	40.3	6	-1.80665	1.106	0.0289491	0.068182	0.531433	1.44536	486.835	336.825	381.918	628.295	629.644	432.884	471.327	376.94	308.274	328.397	246.33	361.187	282.709	494.054
0.55_286.2143n	309.204	0.553533	pos	10-hydroxy-16-oxo-hexadecanoic acid	LMFA01170060	Lipids and lipid-like molecules	Fatty Acyls	Fatty Acids and Conjugates	M+Na, M+K	C16H30O4	40.8	6.84	-0.256911	1.34748	0.0246186	0.061149	0.548331	1.46239	684.911	468.349	548.85	890.609	859.746	624.512	658.646	527.1	461.835	432.795	345.819	488.357	376.865	704.425
0.55_239.1616m/z	239.162	0.553533	pos	xi-5-Hydroxydodecanoic acid	LMFA01050529	Lipids and lipid-like molecules	Fatty Acyls	Fatty Acids and Conjugates	M+Na	C12H24O3	40.9	6.02	-0.96365	2.26597	0.0161561	0.0460241	0.554932	1.4691	1808.04	1230.71	1473.07	2304.36	2260.26	1531.56	1855.96	1423.03	1205.77	1178.63	959.893	1273.7	1006.54	1759.75
0.69_239.1617m/z	239.162	0.687033	pos	4-hydroxy lauric acid	LMFA01050038	Lipids and lipid-like molecules	Fatty Acyls	Fatty Acids and Conjugates	M+Na	C12H24O3	39.4	1.1	-0.423121	4.23912	0.00481131	0.0233217	0.621584	1.53856	5215.54	3389.88	4390.9	6035.99	6185.52	4521.55	6032.54	4126.76	3629.16	3078.42	2526.91	3636.37	2767.14	4701.28
0.55_267.1566m/z	267.157	0.553533	pos	2-methyl-dodecanedioic acid	LMFA01170010	Lipids and lipid-like molecules	Fatty Acyls	Fatty Acids and Conjugates	M+Na	C13H24O4	39.7	2.68	-0.452151	1.1855	0.0129714	0.0404537	0.653751	1.57325	435.413	276.76	318.738	569.044	544.668	406.185	446.831	327.011	260.418	249.818	197.89	299.009	242.62	410.804
9.36_282.2558n	281.249	9.364	neg	7Z-octadecenoic acid	LMFA01030068	Lipids and lipid-like molecules	Fatty Acyls	Fatty Acids and Conjugates	M-H, M+FA-H	C18H34O2	41	5.6	-0.303962	5.91255	0.00817973	0.0308121	0.775206	1.71143	10449.9	6105.95	8030	12084.6	12882.5	13249.2	8220.44	8232.82	4771.47	9981.69	4944.15	5764.74	6421.61	4752.01
8.98_305.2483m/z	305.248	8.98468	neg	5,8,11-eicosatrienoic acid	LMFA01030157	Lipids and lipid-like molecules	Fatty Acyls	Fatty Acids and Conjugates	M-H	C20H34O2	41.4	11.6	-0.925951	1.60733	0.0357562	0.079406	0.838578	1.78829	823.667	460.59	642.253	1331.78	794.999	976.785	663.005	533.178	481.975	884.283	320.267	463.273	310.925	302.818
5.13_693.7245m/z	693.725	5.13015	pos	R. ruber mycolic acid	LMFA01160025	Lipids and lipid-like molecules	Fatty Acyls	Fatty Acids and Conjugates	M+H	C46H92O3	32.8	0	18.1666	1.16908	0.000853583	0.0115884	0.847088	1.79887	283.627	157.67	307.011	319.805	312.082	241.216	312.063	209.585	177.886	150.814	81.3065	182.766	136.362	216.885
8.22_269.1382m/z	269.138	8.222	pos	3-hydroxy-dodecanedioic acid	LMFA01170089	Lipids and lipid-like molecules	Fatty Acyls	Fatty Acids and Conjugates	M+Na	C12H22O5	39.1	10.4	9.27939	1.01006	0.0247601	0.0613444	0.912257	1.88199	245.216	130.296	271.403	390.788	257.959	214.148	177.09	159.908	114.816	139.037	69.9161	94.6068	106.106	257.296
8.74_280.2403n	281.248	8.74113	pos	Linoleic acid	LMFA01030120	Lipids and lipid-like molecules	Fatty Acyls	Fatty Acids and Conjugates	M+H, M+NH4, M+H-H2O	C18H32O2	51.7	67.9	0.121935	1.93275	0.00831029	0.0310368	0.916215	1.88716	972.077	515.101	1009.59	1474.05	1202.39	750.132	720.387	675.913	442.877	631.326	314.064	504.99	560.632	636.718
6.59_374.3644m/z	374.364	6.58507	pos	13-hydroxy-docosanoic acid	LMFA01050210	Lipids and lipid-like molecules	Fatty Acyls	Fatty Acids and Conjugates	M+NH4	C22H44O3	51	69	4.16841	1.00018	0.00918018	0.0329141	0.975989	1.96699	216.24	109.934	324.865	218.625	218.471	182.873	190.967	161.636	162.359	185.88	67.7493	35.9269	91.3214	116.369
8.61_254.2245n	253.217	8.61437	neg	trans-9-palmitoleic acid	LMFA01030057	Lipids and lipid-like molecules	Fatty Acyls	Fatty Acids and Conjugates	M-H, M+FA-H	C16H30O2	40.4	2.88	-0.262759	4.30102	0.00363974	0.0202898	1.12295	2.17792	3907.65	1794.22	3092.37	4138.9	5824.69	4541.86	2903.66	2944.46	1266.65	3191.33	1179.19	1757.17	1835.6	1535.36
9.31_282.2567n	283.264	9.30527	pos	Oleic acid	LMFA01030002	Lipids and lipid-like molecules	Fatty Acyls	Fatty Acids and Conjugates	M+H-H2O, M+H	C18H34O2	52	70.8	2.76836	1.66062	0.00769594	0.0297988	1.30151	2.46487	537.105	217.904	621.735	495.894	938.169	427.231	333.159	406.442	186.676	241.882	202.95	133.329	375.158	167.43
5.97_239.1651m/z	239.165	5.96683	neg	Tetradecanedioic acid	LMFA01170018	Lipids and lipid-like molecules	Fatty Acyls	Fatty Acids and Conjugates	M-H2O-H	C14H26O4	45.1	28.7	-0.68223	1.93079	0.000985596	0.0120163	1.5348	2.89747	584.142	201.604	574.897	659.893	890.25	547.685	465.037	367.087	195.739	247.21	151.301	151.977	367.208	96.188
8.57_254.2250n	255.232	8.56898	pos	13-hexadecenoic acid	LMFA01030263	Lipids and lipid-like molecules	Fatty Acyls	Fatty Acids and Conjugates	M+H-H2O, M+H	C16H30O2	48.5	54.1	1.46915	1.7661	0.00262139	0.0172711	1.59113	3.01286	510.304	169.375	343.707	463.296	875.516	567.87	431.542	379.895	78.7737	253.058	68.9471	179.11	200.228	236.135
8.03_251.2015m/z	251.202	8.02892	neg	6Z,9Z-hexadecadienoic acid	LMFA01030273	Lipids and lipid-like molecules	Fatty Acyls	Fatty Acids and Conjugates	M-H	C16H28O2	40.8	14.2	-0.564511	1.2136	0.0118481	0.038321	1.6074	3.04703	250.734	82.2881	108.49	274.543	193.234	250.462	208.404	469.271	38.0457	112.916	5.90876	167.976	67.1271	101.755
2.98_184.1097n	167.106	2.98208	pos	(3R)-3-isopropenyl-6-oxoheptanoic acid	LMFA01060179	Lipids and lipid-like molecules	Fatty Acyls	Fatty Acids and Conjugates	M+H-H2O, M+H	C10H16O3	48.6	46.9	-1.1852	1.65942	0.0146963	0.0434948	6.08456	67.8632	328.953	4.84729	174.656	374.448	711.084	31.2385	114.477	567.812	5.44664	0.0415186	0.0142484	12.3073	8.5331	2.74096
3.55_292.1577m/z	292.158	3.54772	pos	Tetranor-8-NO2-CLA	LMFA01120009	Lipids and lipid-like molecules	Fatty Acyls	Fatty Acids and Conjugates	M+Na	C14H23NO4	36.6	6.83	21.378	1.21695	0.0229785	0.058367	27.0876	1.42621e+08	183.079	1.28368e-06	54.9992	229.326	396.761	5.35071	59.636	352.403	1.28368e-06	1.28368e-06	1.28368e-06	1.28368e-06	1.28368e-06	1.28368e-06
3.55_246.0925n	247.1	3.54772	pos	Corticrocin	LMFA01031041	Lipids and lipid-like molecules	Fatty Acyls	Fatty Acids and Conjugates	M+H, M+NH4, M+Na	C14H14O4	40.4	21.1	13.242	2.63293	0.0349544	0.0780686	29.4	7.08413e+08	909.375	1.28368e-06	246.382	916.822	1959.07	29.0318	220.163	2084.78	1.28368e-06	1.28368e-06	1.28368e-06	1.28368e-06	1.28368e-06	1.28368e-06
2.88_390.2179n	408.252	2.88108	pos	(3S,5R,6S,7E,9x)-7-Megastigmene-3,6,9-triol 9-glucoside	LMFA13010057	Lipids and lipid-like molecules	Fatty Acyls	Fatty acyl glycosides	M+H, M+NH4	C19H34O8	36.4	13.9	-19.2316	1.55851	0.00681261	0.0280154	0.256691	1.19474	1472.56	1232.54	1694.77	1566.99	1345.38	1372.77	1442.97	1412.48	1331.79	1256.23	1175.89	1268.61	1038.62	1324.11
4.13_554.3034n	572.328	4.1342	pos	2-O-(beta-D-galactopyranosyl-(1->6)-beta-D-galactopyranosyl) 2S-hydroxytridecanoic acid	LMFA13010048	Lipids and lipid-like molecules	Fatty Acyls	Fatty acyl glycosides	M+H, M+NH4	C25H46O13	38.4	25.7	17.257	1.10075	0.000469636	0.0106076	1.10018	2.14381	199.407	93.0153	236.007	224.078	210.656	125.248	212.404	188.05	127.855	68.4464	45.2957	105.89	87.0892	123.516
2.19_673.3794m/z	673.379	2.18612	pos	25-O-(2''-beta-D-glucopyranosyl-beta-D-glucopyranosyl)-25-hydroxy-11E-eicosenoic acid	LMFA13020001	Lipids and lipid-like molecules	Fatty Acyls	Fatty acyl glycosides	M+Na	C32H58O13	40.1	27.3	3.81558	1.39742	0.000591365	0.0108512	1.29865	2.45999	331.714	134.844	291.217	238.907	354.911	480.007	327.408	297.838	114.672	167.549	98.5028	196.892	59.0998	172.347
1.88_326.1940n	344.228	1.87947	pos	docebenone	LMFA05000652	Lipids and lipid-like molecules	Fatty Acyls	Fatty alcohols	M+NH4, M+Na, M+H	C21H26O3	39.6	21.1	17.7456	8.65107	0.00859117	0.0316698	0.402229	1.32155	31844.7	24096.5	30569.4	38410.3	33546	28636.8	33746.6	26158.9	25347.6	24123.1	20020.7	25272.2	19670.8	30144.5
14.24_127.1113m/z	127.111	14.235	pos	(3R,5Z)-5-Octene-1,3-diol	LMFA05000556	Lipids and lipid-like molecules	Fatty Acyls	Fatty alcohols	M+H-H2O	C8H16O2	41.5	12.4	-3.27559	1.37267	0.0152638	0.044416	0.478975	1.39375	765.354	549.132	629.312	893.717	962.352	698.002	772.292	636.448	543.433	518.731	424.989	605.185	452.218	750.234
0.69_171.1003m/z	171.1	0.687033	pos	(2R,3R)-heptane-1,2,3-triol	LMFA05000549	Lipids and lipid-like molecules	Fatty Acyls	Fatty alcohols	M+Na	C7H16O3	41.1	15.6	7.36703	3.0686	0.00676923	0.0279529	0.600642	1.51639	2975.16	1962	2447.59	3614.2	3739.9	2762.21	2969.52	2317.53	1991.45	1863.62	1447.04	2130.98	1657.64	2681.26
6.51_265.1482m/z	265.148	6.51163	neg	Ipomeamaronol	LMFA05000668	Lipids and lipid-like molecules	Fatty Acyls	Fatty alcohols	M-H	C15H22O4	35.2	0	13.5929	1.13681	0.00339263	0.0196306	0.639823	1.55814	377.314	242.157	337.4	319.846	516.659	345.563	384.808	359.609	225.151	191.607	318.225	194.286	250.978	272.694
8.64_270.2793m/z	270.279	8.64063	pos	8-Heptadecenal	LMFA06000259	Lipids and lipid-like molecules	Fatty Acyls	Fatty aldehydes	M+NH4	C17H32O	43.4	20.1	0.510239	2.07847	0.00223222	0.0160354	1.1246	2.18041	779.032	357.287	574.026	1195.32	853.876	670.904	715.382	664.681	365.922	392.656	204.098	383.769	252.555	544.723
6.55_241.1807m/z	241.181	6.55463	neg	(Z)-4-Dodecenal	LMFA06000256	Lipids and lipid-like molecules	Fatty Acyls	Fatty aldehydes	M+FA-H	C13H24O	47.7	41.8	-1.29046	1.60139	0.00461613	0.0228735	1.19851	2.29503	488.391	212.804	546.392	701.866	594.758	395.236	288.456	403.639	162.651	386.144	176.084	146.205	298.601	107.137
2.03_416.2851m/z	416.285	2.03113	pos	N-palmitoyl histidine	LMFA08020132	Lipids and lipid-like molecules	Fatty Acyls	Fatty amides	M+Na	C22H39N3O3	39.5	11.3	-8.36358	3.45943	0.000228716	0.00974942	0.494886	1.40921	3700.38	2625.86	3274.63	3771.67	3634.51	3670.26	3751.54	4099.7	2695.9	2445.1	2325.61	3076.09	2147.45	3065
1.75_342.2125m/z	342.213	1.75147	pos	Arachidonoyl amine	LMFA08010007	Lipids and lipid-like molecules	Fatty Acyls	Fatty amides	M+K	C20H33NO	41.1	34.9	-22.6218	3.15927	0.000548349	0.0107711	0.568566	1.48305	2742.92	1849.52	2617.15	2889.39	2853.02	2673.17	3050.65	2374.18	1927.77	1620.37	1793.11	1878	1391.39	2486.45
1.79_555.3156m/z	555.316	1.79363	pos	IC202B	LMFA08020183	Lipids and lipid-like molecules	Fatty Acyls	Fatty amides	M+Na	C23H44N6O8	49.8	65.8	8.0535	1.29827	0.000258389	0.0100273	0.856346	1.81045	347.152	191.749	271.099	376.917	358.841	384.579	379.249	312.229	204.606	180.076	156.317	233.458	117	259.039
1.84_416.2851m/z	416.285	1.8363	pos	N-arachidonoyl glutamic acid	LMFA08020086	Lipids and lipid-like molecules	Fatty Acyls	Fatty amides	M+H-H2O	C25H39NO5	39	16	12.8832	1.70568	0.00161138	0.0141058	0.870554	1.82836	635.313	347.476	520.08	631.266	685.273	674.873	742.875	557.511	412.118	281.089	257.233	489.242	145.616	499.56
1.84_541.2999m/z	541.3	1.8363	pos	TMC-1D	LMFA08020206	Lipids and lipid-like molecules	Fatty Acyls	Fatty amides	M+H	C30H40N2O7	37	11.1	16.7488	1.99891	0.000916632	0.0117616	0.962885	1.9492	796.481	408.619	591.822	760.019	852.841	887.602	973.883	712.719	472.983	341.345	311.989	545.771	191.604	588.021
8.74_353.3296n	354.337	8.74113	pos	Anandamide (20:l, n-9)	LMFA08040010	Lipids and lipid-like molecules	Fatty Acyls	Fatty amides	M+H, M+Na, M+H-H2O	C22H43NO2	47.2	40.1	0.719639	1.97845	0.0149271	0.0438649	1.00592	2.00822	863.052	429.759	995.483	1149.91	856.415	697.934	992.174	486.398	249.743	857.415	287.192	551.909	101.605	530.692
4.51_442.3373m/z	442.337	4.5095	pos	N-(17-hydroxy-9,12-octadecadienoyl)-glutamine	LMFA08020215	Lipids and lipid-like molecules	Fatty Acyls	Fatty amides	M+NH4	C23H40N2O5	47	68.8	22.9556	1.47373	0.00112399	0.0125445	1.34196	2.53496	341.965	134.9	447.313	418.859	377.734	319.259	214.58	274.046	221.604	109.783	92.4073	145.58	39.2174	200.807
1.96_460.3115m/z	460.311	1.9598	pos	(9Z,12Z,15Z)-3-hydroxyoctadecatrienoylcarnitine	LMFA07070027	Lipids and lipid-like molecules	Fatty Acyls	Fatty esters	M+Na	C25H43NO5	35	1.14	18.6037	1.3313	0.00440427	0.0223329	0.882935	1.84412	407.292	220.859	293.055	393.903	441.682	403.335	527.637	384.137	289.839	161.107	160.232	328.686	84.805	300.487
6.59_424.3421m/z	424.342	6.58507	pos	Linoelaidyl carnitine	LMFA07070078	Lipids and lipid-like molecules	Fatty Acyls	Fatty esters	M+H	C25H45NO4	40.7	12.3	-0.0392573	2.05941	0.000935078	0.0118429	0.891876	1.85559	916.719	494.032	792.686	1059.36	1292.07	762.41	796.344	797.449	557.484	422.766	408.751	530.112	549.94	495.138
7.01_426.3578m/z	426.358	7.00805	pos	3-hydroxyoctadecanoylcarnitine	LMFA07070043	Lipids and lipid-like molecules	Fatty Acyls	Fatty esters	M+H-H2O	C25H49NO5	46.7	39.1	0.0252615	3.03124	0.00412393	0.0215746	1.01974	2.02755	1953.44	963.449	1569.05	2283.29	3078.22	1637.72	1386.95	1765.44	919.807	859.96	762.925	1045.25	899.016	1293.74
9.36_563.5037m/z	563.504	9.364	neg	FAHFA(18:1(9Z)/13-O-18:0)	LMFA07011065	Lipids and lipid-like molecules	Fatty Acyls	Fatty esters	M-H	C36H68O4	50.9	62.1	-1.43529	2.04984	0.0346366	0.0775359	1.20459	2.30472	1171.19	508.169	700.937	994.443	1874.83	1955.44	687.513	813.974	363.071	1127.74	339.946	346.159	521.73	350.363
5.78_370.2953m/z	370.295	5.78195	pos	cis-5-Tetradecenoylcarnitine	LMFA07070057	Lipids and lipid-like molecules	Fatty Acyls	Fatty esters	M+H	C21H39NO4	45.5	30.8	0.256426	1.69237	0.0226982	0.0578484	1.33187	2.51729	611.601	242.96	478.963	915.621	1143.79	401.97	353.409	375.852	262.365	192.592	227.526	265.521	257.832	251.923
4.20_471.3404n	472.348	4.1957	pos	Cervonyl carnitine	LMFA07070055	Lipids and lipid-like molecules	Fatty Acyls	Fatty esters	M+H, M+K	C29H45NO4	43.6	42.5	11.6769	2.18922	0.000678106	0.0109809	1.36082	2.56832	717.158	279.232	949.628	885.314	770.654	558.294	581.089	557.969	444.964	189.033	203.845	344.703	99.3461	393.504
6.38_398.3262m/z	398.326	6.37758	pos	trans-Hexadec-2-enoyl carnitine	LMFA07070109	Lipids and lipid-like molecules	Fatty Acyls	Fatty esters	M+H	C23H43NO4	45.5	32.5	-0.625208	2.3487	0.0162438	0.0461589	1.6768	3.19719	1016.5	317.935	838.48	1186.81	2139.69	706.668	614.712	612.635	314.849	373.411	221.828	376.102	321.293	300.127
6.88_444.3682m/z	444.368	6.87773	pos	12-Hydroxy-12-octadecanoylcarnitine	LMFA07070028	Lipids and lipid-like molecules	Fatty Acyls	Fatty esters	M+H	C25H49NO5	39.2	12.4	-0.39415	1.35059	3.222e-06	0.00299004	1.76502	3.3988	211.256	62.156	254.133	211.514	231.11	159.757	179.417	231.601	45.4458	63.8352	37.0152	72.5704	74.6702	79.3992
6.35_442.3527m/z	442.353	6.34742	pos	(9Z)-3-hydroxyoctadecenoylcarnitine	LMFA07070025	Lipids and lipid-like molecules	Fatty Acyls	Fatty esters	M+H	C25H47NO5	39.1	6.03	0.0532615	1.58216	0.00417654	0.0217501	2.28094	4.85995	342.702	70.5156	331.351	319.314	694.234	207.66	213.267	290.387	52.5139	80.9503	48.1765	82.6193	76.9169	81.917
3.49_475.2807m/z	475.281	3.4899	pos	PA(19:0/0:0)	LMGP10050034	Lipids and lipid-like molecules	Glycerophospholipids	Glycerophosphates	M+Na	C22H45O7P	40.8	12.9	2.6732	1.10712	0.00969848	0.0338989	0.608031	1.52418	357.373	234.47	412.219	324.199	350.662	280.916	322.629	453.615	244.668	262.464	132.706	203.34	220.821	342.818
2.27_504.3373m/z	504.337	2.27112	pos	PC(18:1(6Z)/0:0)	LMGP01050029	Lipids and lipid-like molecules	Glycerophospholipids	Glycerophosphocholines	M+H-H2O	C26H52NO7P	43.9	39.9	-14.4944	3.03663	9.66601e-05	0.00870894	0.393534	1.31361	3377	2570.78	3106.84	3707.69	3408.64	3357.55	3487.96	3193.29	2575.55	2562.97	2350.96	2744.48	2285.77	2904.94
5.08_576.3365m/z	576.336	5.08315	pos	PC(O-18:0/1:0)	LMGP01020084	Lipids and lipid-like molecules	Glycerophospholipids	Glycerophosphocholines	M+K	C27H56NO7P	37.1	5.21	-11.365	1.06906	0.00657564	0.0275285	0.402862	1.32213	514.197	388.916	519.429	534.504	578.307	500.201	547.405	405.334	375.65	432.07	260.02	433.299	400.367	432.091
7.02_495.3326n	496.339	7.02222	pos	PC(16:0/0:0)[rac]	LMGP01050113	Lipids and lipid-like molecules	Glycerophospholipids	Glycerophosphocholines	M+H-H2O, M+H	C24H50NO7P	48.9	45.2	0.143618	23.0485	0.00673319	0.0279028	0.57222	1.48681	173637	116785	150154	209096	218368	159074	164217	140916	120642	118439	91460.2	123934	88476.1	157760
6.30_538.3137m/z	538.314	6.29532	neg	PC(16:1(9E)/0:0)	LMGP01050021	Lipids and lipid-like molecules	Glycerophospholipids	Glycerophosphocholines	M+FA-H	C24H48NO7P	52.8	67.7	-2.75829	3.85973	0.0032988	0.019367	0.572649	1.48725	4902.51	3296.36	5323.47	4732.1	6321.25	5006.41	4604.47	3427.38	2588.75	3475.36	3358.31	3720.11	3153.59	3482
6.76_508.3394m/z	508.339	6.7594	pos	PC(17:1(10Z)/0:0)	LMGP01050002	Lipids and lipid-like molecules	Glycerophospholipids	Glycerophosphocholines	M+H	C25H50NO7P	46.5	40.1	-0.715493	1.08514	0.0471505	0.0968839	0.584481	1.4995	481.245	320.937	401.138	560.021	733.049	366.009	500.637	326.613	341.491	423.222	249.18	289.208	211.866	410.655
13.81_785.5921n	786.599	13.8056	pos	PC(18:0/18:2(9Z,12Z))	LMGP01010768	Lipids and lipid-like molecules	Glycerophospholipids	Glycerophosphocholines	M+H, M+H-H2O	C44H84NO8P	39.4	7.84	-1.78745	11.285	0.0275253	0.0659373	0.588308	1.50348	43346.4	28830.6	45709.5	53859.9	29375.8	47226.2	44655.1	39251.6	32677.9	31053.5	11730.5	29299.6	23194	45028.3
6.86_848.6296m/z	848.63	6.8634	pos	1-(2E,6E-phytadienyl)-2-(2E,6E-phytadienyl)-sn-glycero-3-phosphocholine	LMGP01040096	Lipids and lipid-like molecules	Glycerophospholipids	Glycerophosphocholines	M+K	C48H92NO6P	36.8	6.96	0.310858	1.04224	0.0397483	0.0856593	0.610353	1.52663	367.503	240.728	556.792	397.544	353.834	236.908	315.594	344.348	198.5	303.273	127.886	201.501	322.366	290.842
7.02_509.3095n	527.322	7.02222	pos	PC(8:0/8:0)	LMGP01011251	Lipids and lipid-like molecules	Glycerophospholipids	Glycerophosphocholines	M+H, M+NH4	C24H48NO8P	42.2	28.6	-4.3342	1.3616	0.000956452	0.0119433	0.85104	1.8038	378.655	209.92	388.72	463.588	407.497	280.893	443.1	288.132	218.607	222.036	177.519	242.567	138.259	260.535
4.40_766.5386m/z	766.539	4.40092	neg	PC(15:0/20:4(5Z,8Z,11Z,14Z))	LMGP01011424	Lipids and lipid-like molecules	Glycerophospholipids	Glycerophosphocholines	M-H	C43H78NO8P	34.8	5.15	-0.789608	1.09446	0.0421202	0.0893088	1.03202	2.04489	293.304	143.433	140.737	220.474	227.881	264.174	539.594	366.967	227.27	156.657	146.617	20.5779	124.17	185.304
7.27_378.2492m/z	378.249	7.2662	pos	PC(O-10:1(9E)/0:0)	LMGP01060027	Lipids and lipid-like molecules	Glycerophospholipids	Glycerophosphocholines	M+H-H2O	C18H38NO6P	41.5	45.1	22.4107	1.12272	0.019914	0.0528031	1.17641	2.26014	279.119	123.497	177.317	504.067	324.087	272.012	271.923	125.31	117.957	125.065	94.6452	190.58	72.8561	139.876
9.23_538.4232m/z	538.423	9.22895	pos	PC(O-20:0/0:0)	LMGP01060041	Lipids and lipid-like molecules	Glycerophospholipids	Glycerophosphocholines	M+H	C28H60NO6P	38.2	4.76	0.166048	2.16481	0.00828823	0.0310071	1.40359	2.6456	897.101	339.092	515.295	1308.57	918.133	1276.11	664.35	700.145	310.492	841.801	194.393	239.755	172.575	275.535
2.77_768.4948m/z	768.495	2.76692	pos	PE(15:0/20:2(11Z,14Z))	LMGP02010465	Lipids and lipid-like molecules	Glycerophospholipids	Glycerophosphoethanolamines	M+K	C40H76NO8P	46.2	41.4	1.13152	1.63285	0.00466513	0.0229419	0.280885	1.21494	1637.14	1347.51	1375.45	1617.46	1676.17	1739.89	1822.26	1591.6	1228.22	1453.62	1373.35	1454.09	1165.84	1409.92
2.70_724.4684m/z	724.468	2.6961	pos	PE(P-16:0/17:2(9Z,12Z))	LMGP02030017	Lipids and lipid-like molecules	Glycerophospholipids	Glycerophosphoethanolamines	M+K	C38H72NO7P	45.4	36.5	0.930434	2.01015	0.00156417	0.0139178	0.306799	1.23696	2121.83	1715.36	1889.5	2324.18	2146.28	2335.05	2087.32	1948.66	1703.74	1557.41	1617.01	1788.25	1676.94	1948.82
6.78_452.2771m/z	452.277	6.7843	neg	PE(0:0/16:0)	LMGP02050036	Lipids and lipid-like molecules	Glycerophospholipids	Glycerophosphoethanolamines	M-H	C21H44NO7P	44.7	30.1	-2.64055	1.01493	0.0139465	0.0421878	0.374265	1.29618	500.641	386.244	594.684	503.56	581.077	443.195	416.991	464.341	325.439	423.966	463.423	376.002	312.822	415.81
5.13_708.4040m/z	708.404	5.13015	pos	PE(18:4(6Z,9Z,12Z,15Z)/13:0)	LMGP02010739	Lipids and lipid-like molecules	Glycerophospholipids	Glycerophosphoethanolamines	M+K	C36H64NO8P	37.8	7.25	5.73732	1.94343	0.00636575	0.0270495	0.393609	1.31368	1614.61	1229.08	1698.24	1639.84	1622.02	1515.78	1868.29	1343.46	1152.38	1398.72	861.454	1281.75	1228.33	1451.82
5.08_806.4623m/z	806.462	5.08315	pos	PE(18:4(6Z,9Z,12Z,15Z)/22:6(4Z,7Z,10Z,13Z,16Z,19Z))	LMGP02010768	Lipids and lipid-like molecules	Glycerophospholipids	Glycerophosphoethanolamines	M+Na	C45H70NO8P	34.4	2.59	-13.7886	1.55004	0.021936	0.0565342	0.406898	1.32583	1208.87	911.781	1214.86	1146.71	1279.75	1177.79	1432.96	1001.14	746.574	1191.27	561	984.858	1064.73	922.252
5.76_674.5041m/z	674.504	5.76185	pos	PE(15:0/17:0)	LMGP02011234	Lipids and lipid-like molecules	Glycerophospholipids	Glycerophosphoethanolamines	M+H-H2O	C37H74NO8P	41.2	30.6	-11.2408	1.12421	0.0371465	0.0816066	0.442949	1.35938	601.618	442.568	707.518	677.959	815.625	427.774	494.534	486.298	428.735	433.373	384.275	397.938	509.831	501.254
2.33_518.3164m/z	518.316	2.32778	pos	1-(2-methoxy-6Z-octadecenyl)-sn-glycero-3-phosphoethanolamine	LMGP02060020	Lipids and lipid-like molecules	Glycerophospholipids	Glycerophosphoethanolamines	M+Na	C24H50NO7P	48.2	59	-10.6373	2.49276	0.00215579	0.0158342	0.497564	1.41183	2060.17	1459.22	2049.3	2088.51	2133.35	2100.03	2176.69	1813.16	1723.8	1267.06	1130.3	1504.29	1162.72	1967.17
4.96_760.4294m/z	760.429	4.95832	pos	PE(13:0/22:6(4Z,7Z,10Z,13Z,16Z,19Z))	LMGP02010405	Lipids and lipid-like molecules	Glycerophospholipids	Glycerophosphoethanolamines	M+K	C40H68NO8P	36.6	5.42	-2.852	1.9941	0.00468685	0.0229829	0.585349	1.5004	1214.04	809.145	1330.17	1179.44	1275.32	1104.2	1425.29	969.831	742.202	1007.66	412.506	909.267	803.213	980.022
13.81_771.5816n	789.615	13.8056	pos	PE(18:0/20:2(11Z,14Z))	LMGP02010124	Lipids and lipid-like molecules	Glycerophospholipids	Glycerophosphoethanolamines	M+NH4, M+Na, M+H	C43H82NO8P	41.8	34.4	4.96852	3.45755	0.0179532	0.049357	0.605472	1.52148	3851.59	2531.48	4268.72	3068.93	4794.74	3518.56	4459.33	2999.27	2530.87	1894.19	2244.55	2404.71	1916.51	4198.08
2.74_738.4479m/z	738.448	2.7386	pos	PE(18:3(6Z,9Z,12Z)/15:0)	LMGP02010683	Lipids and lipid-like molecules	Glycerophospholipids	Glycerophosphoethanolamines	M+K	C38H70NO8P	42.3	28.2	1.16842	1.17173	0.000990447	0.0120428	0.62295	1.54002	361.112	234.485	385.597	386.628	352.064	369.065	373.589	299.729	231.303	234.612	186.141	270.812	159.254	324.79
8.76_672.5253m/z	672.525	8.75547	pos	PE(P-20:0/13:0)	LMGP02030063	Lipids and lipid-like molecules	Glycerophospholipids	Glycerophosphoethanolamines	M+H-H2O	C38H76NO7P	36.9	20.3	-10.7323	1.07429	0.0305146	0.0707614	0.632458	1.5502	414.782	267.566	258.708	559.894	463.686	441.69	376.338	388.375	319.244	338.236	129.119	252.698	172.729	393.371
6.15_732.5459m/z	732.546	6.14543	pos	PE(P-18:0/20:5(5Z,8Z,11Z,14Z,17Z))	LMGP02030056	Lipids and lipid-like molecules	Glycerophospholipids	Glycerophosphoethanolamines	M+H-H2O	C43H76NO7P	42.3	45.4	17.6685	1.2834	0.019183	0.0514695	0.702084	1.62685	511.865	314.635	556.983	539.756	790.516	348.03	417.137	418.769	285.001	332.854	228.641	258.178	419.447	363.689
7.85_434.2748m/z	434.275	7.85002	pos	PE(0:0/16:1(9Z))	LMGP02050037	Lipids and lipid-like molecules	Glycerophospholipids	Glycerophosphoethanolamines	M+H-H2O	C21H42NO7P	40.1	31.8	18.1402	1.03196	0.0319078	0.0730275	0.720198	1.64741	362.496	220.04	184.938	336.087	439.391	431.752	456.991	325.815	295.435	254.016	83.2056	210.511	142.284	334.788
7.96_481.3170n	482.324	7.96385	pos	PE(18:0/0:0)	LMGP02050001	Lipids and lipid-like molecules	Glycerophospholipids	Glycerophosphoethanolamines	M+H-H2O, M+H	C23H48NO7P	51.1	57.5	0.230576	4.38736	0.00229701	0.0162105	0.790097	1.72919	4560.77	2637.52	4699.17	5391.92	5871.66	4236.49	3661.93	3503.44	2248.46	3197.8	2430.5	2732.92	1668.84	3546.58
8.22_746.5639m/z	746.564	8.222	pos	PE(14:0/22:1(11Z))	LMGP02010419	Lipids and lipid-like molecules	Glycerophospholipids	Glycerophosphoethanolamines	M+H	C41H80NO8P	38.1	13.6	-7.359	1.82573	0.0187672	0.0507789	0.791524	1.7309	907.015	524.013	750.574	1319.09	865.405	998.664	764.904	743.454	499.441	542.561	174.594	593.413	401.657	932.411
7.78_482.3238m/z	482.324	7.77785	pos	PE(0:0/18:0)	LMGP02050038	Lipids and lipid-like molecules	Glycerophospholipids	Glycerophosphoethanolamines	M+H	C23H48NO7P	50.1	55.8	-0.730624	1.66615	0.00235786	0.0164822	0.825595	1.77227	630.842	355.952	689.624	673.008	863.41	511.805	530.918	516.287	310.552	416.014	305.427	389.856	228.753	485.111
8.25_702.5353m/z	702.535	8.251	pos	PE(15:0/19:0)	LMGP02011231	Lipids and lipid-like molecules	Glycerophospholipids	Glycerophosphoethanolamines	M+H-H2O	C39H78NO8P	36	20.6	-11.0031	1.5643	0.00197044	0.0153368	0.847299	1.79913	536.297	298.087	470.046	681.491	628.511	491.695	506.684	439.355	313.226	289.985	158.234	341.007	227.441	458.629
8.73_716.5498m/z	716.55	8.72663	pos	PE(19:0/16:0)	LMGP02010171	Lipids and lipid-like molecules	Glycerophospholipids	Glycerophosphoethanolamines	M+H-H2O	C40H80NO8P	40.2	23.5	-12.3318	1.47833	0.00827462	0.0309953	0.878351	1.83827	529.466	288.023	305.272	751.97	618.206	543.676	462.092	495.579	232.665	371.361	165.213	292.901	233.61	432.391
6.53_525.2849n	526.292	6.52708	pos	PE(22:6(4Z,7Z,10Z,13Z,16Z,19Z)/0:0)	LMGP02050013	Lipids and lipid-like molecules	Glycerophospholipids	Glycerophosphoethanolamines	M+H, M+Na, M+H-H2O	C27H44NO7P	49.9	52	-1.15212	7.69662	0.0153535	0.0445679	0.908575	1.87719	15252.7	8125.29	12434.2	18566.8	23623.4	14664.3	13083.8	9143.82	6358.08	10525.9	5939.77	9121.64	4352.67	12453.6
6.50_790.5875m/z	790.588	6.49792	pos	PE(19:1(9Z)/22:4(7Z,10Z,13Z,16Z))	LMGP02010822	Lipids and lipid-like molecules	Glycerophospholipids	Glycerophosphoethanolamines	M+H-H2O	C46H82NO8P	38.8	33.9	16.1352	1.53629	0.00536269	0.0246173	0.952449	1.93515	490.686	253.564	629.979	504.027	626.48	362.764	401.329	419.538	176.724	285.808	108.48	182.871	370.818	396.685
4.37_692.4780m/z	692.478	4.36768	pos	PE(20:5(5Z,8Z,11Z,14Z,17Z)/14:0)	LMGP02010964	Lipids and lipid-like molecules	Glycerophospholipids	Glycerophosphoethanolamines	M+H-H2O	C39H68NO8P	44.4	53.8	18.4316	2.0304	0.00124854	0.0129706	1.03545	2.04975	768.294	374.823	916.315	950.555	815.065	712.499	587.583	627.745	547.318	299.473	297.637	456.253	138.015	510.245
4.64_618.4416m/z	618.442	4.635	pos	PE(18:0/10:0)	LMGP02010021	Lipids and lipid-like molecules	Glycerophospholipids	Glycerophosphoethanolamines	M+H-H2O	C33H66NO8P	37.2	10.7	-12.1875	1.80458	0.00386596	0.0209453	1.05886	2.08329	633.067	303.879	838.221	826.582	652.667	562.399	429.222	489.312	467.939	257.335	266.541	352.06	90.3184	389.079
7.76_768.5558m/z	768.556	7.76285	pos	PE(20:0/18:4(6Z,9Z,12Z,15Z))	LMGP02010114	Lipids and lipid-like molecules	Glycerophospholipids	Glycerophosphoethanolamines	M+H	C43H78NO8P	40.2	21.8	2.67158	1.17481	0.0264013	0.0640205	1.0624	2.0884	299.482	143.403	247.575	380.148	116.008	302.953	468.24	281.972	175.916	159.486	2.14635	173.435	96.7708	252.662
4.32_604.4256m/z	604.426	4.32068	pos	1-(2-methoxy-tetracosanyl)-sn-glycero-3-phosphoethanolamine	LMGP02060028	Lipids and lipid-like molecules	Glycerophospholipids	Glycerophosphoethanolamines	M+Na	C30H64NO7P	44	37.6	-9.65345	2.40958	0.000734454	0.0112752	1.14223	2.20721	984.102	445.857	1215.21	1216.09	1040.45	876.289	789.589	766.983	650.791	364.332	339.446	541.226	170.131	609.219
6.91_504.3081m/z	504.308	6.90672	pos	PE(20:3(8Z,11Z,14Z)/0:0)	LMGP02050022	Lipids and lipid-like molecules	Glycerophospholipids	Glycerophosphoethanolamines	M+H	C25H46NO7P	50.1	56.5	-0.678305	1.86297	0.00458866	0.0228199	1.15694	2.22984	665.532	298.467	547.469	834.019	983.56	576.179	537.722	514.241	172.954	494.894	218.525	318.319	128.177	457.933
7.86_448.2902m/z	448.29	7.86418	pos	PE(17:1(9Z)/0:0)	LMGP02050008	Lipids and lipid-like molecules	Glycerophospholipids	Glycerophosphoethanolamines	M+H-H2O	C22H44NO7P	41.9	33.1	17.1641	6.38175	0.000764032	0.0112752	1.1843	2.27254	7016.27	3087.42	4830.99	9437.88	8251.73	7390.16	7104.03	5082.85	3113.65	3723.1	1889.9	3117.06	2248.37	4432.46
3.65_789.6161m/z	789.616	3.64855	pos	PE(20:2(5Z,8Z)/18:0)	LMGP02010122	Lipids and lipid-like molecules	Glycerophospholipids	Glycerophosphoethanolamines	M+NH4	C43H82NO8P	32.6	0	5.73045	2.07339	0.00104469	0.0122627	1.19084	2.28285	707.873	310.082	671.983	841.772	758.251	733.055	711.486	530.689	71.9437	179.022	277.591	364.148	349.039	618.751
6.42_478.2923m/z	478.292	6.42425	pos	PE(0:0/18:2(9Z,12Z))	LMGP02050041	Lipids and lipid-like molecules	Glycerophospholipids	Glycerophosphoethanolamines	M+H	C23H44NO7P	49.1	52.4	-1.15125	1.38558	0.0415837	0.0885692	1.2561	2.38849	473.463	198.227	370.57	514.608	1006.64	369.356	351.184	228.424	141.33	318.527	157.5	199.253	101.994	270.758
2.58_611.4847m/z	611.485	2.58277	pos	1-(2-methoxy-18Z-pentacosenyl)-sn-glycero-3-phosphoethanolamine	LMGP02060030	Lipids and lipid-like molecules	Glycerophospholipids	Glycerophosphoethanolamines	M+NH4	C31H64NO7P	45.6	48.8	14.9339	1.67048	0.0169422	0.047454	1.28445	2.43589	562.45	230.901	287.245	1011.09	709.345	559.445	447.274	360.303	210.69	216.832	111.341	252.59	182.546	411.409
6.57_478.2923m/z	478.292	6.57073	pos	PE(18:2(9Z,12Z)/0:0)	LMGP02050011	Lipids and lipid-like molecules	Glycerophospholipids	Glycerophosphoethanolamines	M+H	C23H44NO7P	53.8	73.6	-1.09004	4.34634	0.00972498	0.0339497	1.34077	2.53286	3617.89	1428.38	2855.55	3974.09	6651.66	2926.3	3223.84	2075.92	1160.43	1891.22	1090.67	1338.83	906.966	2182.18
8.25_468.3442m/z	468.344	8.251	pos	PE(O-18:0/0:0)	LMGP02060003	Lipids and lipid-like molecules	Glycerophospholipids	Glycerophosphoethanolamines	M+H	C23H50NO6P	48.6	53.6	-1.37678	1.36095	0.000466472	0.0106076	1.40058	2.64007	287.716	108.98	257.197	321.266	431.419	248.868	220.431	247.115	122.574	169.332	94.5217	91.3927	62.701	113.361
7.74_874.6641m/z	874.664	7.73842	neg	PE(20:0/22:1(13Z))	LMGP02010287	Lipids and lipid-like molecules	Glycerophospholipids	Glycerophosphoethanolamines	M+FA-H	C47H92NO8P	33.5	9.59	11.8993	1.62334	0.00141327	0.0134782	3.58962	12.0388	266.147	22.1074	198.148	460.431	362.851	97.5686	222.712	255.174	1.28368e-06	1.28368e-06	1.28368e-06	1.28368e-06	12.3672	120.277
8.20_874.6643m/z	874.664	8.20057	neg	PE(22:0/20:1(11Z))	LMGP02010290	Lipids and lipid-like molecules	Glycerophospholipids	Glycerophosphoethanolamines	M+FA-H	C47H92NO8P	33.8	9.74	12.0678	1.25294	0.00246154	0.0167645	3.94334	15.3838	162.768	10.5805	98.3445	318.086	212.18	78.0999	114.688	155.213	1.28368e-06	1.28368e-06	1.28368e-06	1.28368e-06	4.12687	59.356
7.02_557.3196m/z	557.32	7.02062	neg	PG(18:0/0:0)	LMGP04050009	Lipids and lipid-like molecules	Glycerophospholipids	Glycerophosphoglycerols	M+FA-H	C24H49O9P	40.2	22	19.5179	2.82415	0.0454333	0.0943935	0.240806	1.18165	6921.82	5857.75	6197.44	7671.88	7757.19	6056.23	7455.06	6393.15	4454.63	5607.65	5914.32	6392.25	6901.55	5876.1
7.83_585.3510m/z	585.351	7.82625	neg	PG(20:0/0:0)	LMGP04050015	Lipids and lipid-like molecules	Glycerophospholipids	Glycerophosphoglycerols	M+FA-H	C26H53O9P	41.6	28	18.585	1.87137	0.0284905	0.0674618	0.244983	1.18508	3023.21	2551.06	2467.53	3325.45	3251.77	3338.46	3152.89	2603.18	2510.68	2944.21	2356.49	2321.46	2468.3	2705.25
6.44_581.3196m/z	581.32	6.43948	neg	PG(20:2(11Z,14Z)/0:0)	LMGP04050024	Lipids and lipid-like molecules	Glycerophospholipids	Glycerophosphoglycerols	M+FA-H	C26H49O9P	39.8	19.3	18.6786	1.84374	0.00762005	0.0296718	0.381078	1.30231	1577.29	1211.14	1454.99	1673.77	2019.53	1237.03	1573.04	1505.37	1103.16	1248.01	1188.55	1182.57	1265.29	1279.27
4.48_703.3918m/z	703.392	4.47785	pos	PG(14:1(9Z)/14:0)	LMGP04010111	Lipids and lipid-like molecules	Glycerophospholipids	Glycerophosphoglycerols	M+K	C34H65O10P	33.4	5.51	-4.28129	1.31489	0.0284489	0.0673749	0.417352	1.33547	767.521	574.718	835.337	794.117	654.382	713.742	817.739	789.81	718.431	469.554	374.221	613.866	455.33	816.908
4.20_685.4056m/z	685.406	4.1957	pos	PG(14:1(9Z)/14:1(9Z))	LMGP04010920	Lipids and lipid-like molecules	Glycerophospholipids	Glycerophosphoglycerols	M+Na	C34H63O10P	35.6	0	0.701565	1.05728	0.00313949	0.0188769	0.556507	1.4707	344.116	233.98	344.97	339.006	365.54	267.668	376.457	371.052	220.673	267.142	142.069	219.33	313.196	241.472
5.11_767.4356m/z	767.436	5.11432	pos	PG(13:0/20:4(5Z,8Z,11Z,14Z))	LMGP04010086	Lipids and lipid-like molecules	Glycerophospholipids	Glycerophosphoglycerols	M+K	C39H69O10P	35.5	6.39	13.2411	1.22039	0.00206794	0.0156162	0.698943	1.62331	372.788	229.646	374.606	418.209	388.468	332.163	445.349	277.932	221.492	252.986	122.681	264.039	219.247	297.432
6.98_907.5779m/z	907.578	6.97922	pos	PG(21:0/22:4(7Z,10Z,13Z,16Z))	LMGP04010701	Lipids and lipid-like molecules	Glycerophospholipids	Glycerophosphoglycerols	M+K	C49H89O10P	36.9	0	-5.28553	1.60974	0.00570756	0.0254285	0.949659	1.93142	555.871	287.805	656.552	685.233	736.65	439.417	356.531	460.841	246.052	376.983	303.154	276.405	116.307	407.926
13.79_847.5810m/z	847.581	13.7871	neg	PG(16:1(9Z)/22:1(11Z))	LMGP04010223	Lipids and lipid-like molecules	Glycerophospholipids	Glycerophosphoglycerols	M+FA-H	C44H83O10P	38.9	14.5	12.9323	1.72958	0.00558002	0.0251138	0.981181	1.97408	620.148	314.145	634.136	653.726	270.878	715.292	655.78	791.073	302.488	287.578	122.454	450.933	317.048	404.369
8.01_555.3527m/z	555.353	8.00683	pos	PG(21:0/0:0)	LMGP04050029	Lipids and lipid-like molecules	Glycerophospholipids	Glycerophosphoglycerols	M+H	C27H55O9P	46.4	63.8	-23.4	1.20577	0.0254388	0.0624499	1.03193	2.04476	331.984	162.358	158.618	545.023	395.128	196.568	409.201	287.366	194.996	213.741	84.235	119.101	120.607	241.47
2.30_689.3742m/z	689.374	2.29945	pos	PG(14:1(9Z)/13:0)	LMGP04010110	Lipids and lipid-like molecules	Glycerophospholipids	Glycerophosphoglycerols	M+K	C33H63O10P	36.5	10.9	-7.46227	1.46364	0.00533458	0.0245498	1.19504	2.28951	403.468	176.224	221.957	378.862	524.043	466.969	411.95	417.028	146.137	160.541	107.704	187.094	55.08	400.791
4.24_516.3735m/z	516.373	4.24252	pos	PG(O-18:0/0:0)	LMGP04060002	Lipids and lipid-like molecules	Glycerophospholipids	Glycerophosphoglycerols	M+NH4	C24H51O8P	42.7	34.4	15.0669	2.32321	0.000580665	0.0108512	1.27254	2.41587	840.52	347.917	1056.63	1036.1	908.127	681.712	698.098	662.457	542.682	251.048	252.449	432.333	126.539	482.45
8.57_764.5823m/z	764.582	8.56898	pos	PG(O-18:0/17:2(9Z,12Z))	LMGP04020026	Lipids and lipid-like molecules	Glycerophospholipids	Glycerophosphoglycerols	M+NH4	C41H79O9P	34.6	0	3.10928	1.32313	3.76013e-05	0.00841241	1.77116	3.41329	222.442	65.1693	191.684	262.413	247.935	276.291	194.401	161.927	40.3846	109.109	29.7774	65.5377	54.1157	92.0916
4.67_857.6739m/z	857.674	4.66607	neg	PG(22:0/21:0)	LMGP04010721	Lipids and lipid-like molecules	Glycerophospholipids	Glycerophosphoglycerols	M-H2O-H	C49H97O10P	40.7	29.3	11.1777	3.61186	0.000438536	0.0106076	2.84941	7.20703	1306.51	181.283	995.445	1515.49	1582.69	654.689	1639.44	1451.33	1.28368e-06	1.28368e-06	1.28368e-06	1.28368e-06	175.982	911.718
8.13_857.6735m/z	857.673	8.1284	neg	PG(21:0/22:0)	LMGP04010698	Lipids and lipid-like molecules	Glycerophospholipids	Glycerophosphoglycerols	M-H2O-H	C49H97O10P	41.6	30.7	10.7113	2.54152	0.0002524	0.0099619	2.99201	7.95584	646.476	81.2581	459.315	995.306	761.25	454.495	555.667	652.824	2.41145	0.5985	1.28368e-06	1.28368e-06	139.694	344.844
6.57_977.5645m/z	977.564	6.5688	neg	PIM1(18:2(9Z,12Z)/16:0)	LMGP15010027	Lipids and lipid-like molecules	Glycerophospholipids	Glycerophosphoinositolglycans	M-H2O-H	C49H89O18P	36.8	0.425	3.67172	1.44807	0.0343481	0.0771298	0.932166	1.90814	606.89	318.053	565.666	595.616	1075.9	574.897	439.854	389.407	141.514	564.299	347.413	282.556	177.825	394.711
6.57_979.5775m/z	979.577	6.57073	pos	PIM1(18:0/16:2(9Z,12Z))	LMGP15010017	Lipids and lipid-like molecules	Glycerophospholipids	Glycerophosphoinositolglycans	M+H-H2O	C49H89O18P	37.6	0.0162	2.13304	2.13736	0.0295649	0.0691801	1.36575	2.57711	973.663	377.812	901.782	1045.86	1976.89	692.125	736.135	489.186	175.859	663.091	264.148	370.467	138.748	654.561
6.59_997.6244m/z	997.624	6.58507	pos	PIM1(17:0/18:0)	LMGP15010012	Lipids and lipid-like molecules	Glycerophospholipids	Glycerophosphoinositolglycans	M+H-H2O	C50H95O18P	36.5	0.00367	2.03174	1.85078	0.00449721	0.0226192	1.56088	2.95033	553.595	187.638	490.337	613.242	984.141	420.201	350.137	463.514	102.413	266.759	157.736	180.252	93.7757	324.895
6.99_947.6107m/z	947.611	6.99195	neg	PI(P-18:0/22:2(13Z,16Z))	LMGP06030055	Lipids and lipid-like molecules	Glycerophospholipids	Glycerophosphoinositols	M+FA-H	C49H91O12P	35.7	0.956	-13.598	1.90117	0.0109391	0.0365287	0.435016	1.35193	1477.31	1092.75	1700.43	1604.07	1781.01	1134.08	1235.18	1409.11	1036.87	1169.23	1230.31	1081.89	820.632	1217.55
6.98_905.5636m/z	905.564	6.97745	neg	PI(19:0/22:6(4Z,7Z,10Z,13Z,16Z,19Z))	LMGP06010447	Lipids and lipid-like molecules	Glycerophospholipids	Glycerophosphoinositols	M-H2O-H	C50H85O13P	35.6	0.15	9.39449	1.06319	0.0428979	0.090384	0.634763	1.55268	408.94	263.377	596.853	399.282	541.639	350.156	236.208	329.504	227.536	288.48	343.58	226.239	159.432	334.992
4.96_875.4978m/z	875.498	4.95832	pos	PI(17:1(9Z)/17:0)	LMGP06010224	Lipids and lipid-like molecules	Glycerophospholipids	Glycerophosphoinositols	M+K	C43H81O13P	32.3	0	-8.18901	1.08754	0.00566108	0.0253155	0.768502	1.7035	287.774	168.931	323.391	275.507	290.403	261.901	359.213	216.227	129.291	217.742	61.6883	182.259	173.146	249.459
4.09_802.4477n	820.473	4.08737	pos	PI(14:1(9Z)/18:3(6Z,9Z,12Z))	LMGP06010090	Lipids and lipid-like molecules	Glycerophospholipids	Glycerophosphoinositols	M+H, M+NH4	C41H71O13P	34.5	1.6	-19.3519	1.68339	0.000298875	0.0102893	0.969234	1.9578	497.534	254.129	612.099	467.242	476.887	363.328	541.073	524.571	263.763	239.235	127.676	249.346	316.567	328.186
2.47_592.3898m/z	592.39	2.46943	pos	1-(2-methoxy-16Z-tricosenyl)-sn-glycero-3-phosphoserine	LMGP03060024	Lipids and lipid-like molecules	Glycerophospholipids	Glycerophosphoserines	M+H-H2O	C30H60NO9P	46.5	51	-12.3417	2.87114	0.001478	0.0136652	0.362818	1.28594	3509.21	2728.92	3123.99	3598.29	3720.44	3415.77	3862.78	3334.01	2555.96	2708.54	2459.79	2931.69	2395.62	3321.92
5.08_762.4362m/z	762.436	5.08315	pos	PS(13:0/20:5(5Z,8Z,11Z,14Z,17Z))	LMGP03010087	Lipids and lipid-like molecules	Glycerophospholipids	Glycerophosphoserines	M+Na	C39H66NO10P	37.9	9.4	6.13744	2.18178	0.0116197	0.0378686	0.417442	1.33556	2091.16	1565.76	2178.87	2051.95	2115.34	1953.41	2466.21	1781.21	1359.78	1966.29	973.775	1699.37	1676.41	1718.94
13.82_819.5985n	802.595	13.8201	pos	PS(18:0/20:0)	LMGP03010962	Lipids and lipid-like molecules	Glycerophospholipids	Glycerophosphoserines	M+H-H2O, M+Na	C44H86NO10P	41.7	26.9	-0.487245	1.0102	0.0287463	0.067856	0.456537	1.37224	442.098	322.171	450.686	533.204	346.487	519.395	472.585	330.229	343.609	326.501	277.604	311.247	222.425	451.643
5.08_718.4114m/z	718.411	5.08315	pos	PS(13:0/15:0)	LMGP03010936	Lipids and lipid-like molecules	Glycerophospholipids	Glycerophosphoserines	M+K	C34H66NO10P	33.8	6.86	8.53057	2.95868	0.00339874	0.0196306	0.473074	1.38806	3153.25	2271.69	3291.97	3095.58	3199.79	2985.7	3663.32	2683.12	2134.78	2643.95	1409.93	2555.85	2323.93	2561.69
13.81_825.5841n	848.554	13.8056	pos	PS(O-18:0/22:4(7Z,10Z,13Z,16Z))	LMGP03020040	Lipids and lipid-like molecules	Glycerophospholipids	Glycerophosphoserines	M+H, M+Na	C46H84NO9P	42.8	46	-5.13709	1.73175	0.0485184	0.0989669	0.523909	1.43785	1333.41	927.369	1480.25	1068.28	1838.99	1317.67	1445.52	849.765	1110.82	628.062	1054.31	830.704	628.059	1312.25
4.96_716.4047m/z	716.405	4.95832	pos	PS(15:1(9Z)/13:0)	LMGP03010162	Lipids and lipid-like molecules	Glycerophospholipids	Glycerophosphoserines	M+K	C34H64NO10P	32.3	6.55	21.8444	2.34155	0.0021667	0.0158633	0.582161	1.49709	1601.6	1069.81	1648.58	1604.09	1637.15	1499.2	1898.67	1321.89	1032.87	1256.96	597.922	1170.43	1053.43	1307.24
2.03_569.2717n	570.279	2.03113	pos	PS(22:6(4Z,7Z,10Z,13Z,16Z,19Z)/0:0)	LMGP03050013	Lipids and lipid-like molecules	Glycerophospholipids	Glycerophosphoserines	M+H, M+NH4	C28H44NO9P	41.4	29.9	-6.50975	1.9754	0.0064009	0.0271147	0.646866	1.56576	1136.61	725.911	868.058	1282.11	1386.02	962.035	1061.8	1259.61	761.314	682.208	579.104	889.637	429.222	1013.98
5.11_796.4504m/z	796.45	5.11432	pos	PS(14:0/20:3(8Z,11Z,14Z))	LMGP03010104	Lipids and lipid-like molecules	Glycerophospholipids	Glycerophosphoserines	M+K	C40H72NO10P	37.8	2.9	-2.79426	1.49101	0.00319996	0.0190564	0.678774	1.60078	595.438	371.968	713.217	593.755	546.264	558.334	704.759	456.299	347.729	478.157	187.7	447.241	393.259	377.719
2.80_710.4460m/z	710.446	2.79525	pos	PS(14:1(9Z)/18:3(9Z,12Z,15Z))	LMGP03010123	Lipids and lipid-like molecules	Glycerophospholipids	Glycerophosphoserines	M+H-H2O	C38H66NO10P	46.6	62.6	9.48097	1.46868	0.00141112	0.0134782	0.724228	1.65202	494.516	299.341	567.707	445.895	443.384	354.124	516.713	639.275	321.381	262.673	233.708	316.427	324.851	337.006
13.81_849.5854n	832.582	13.8056	pos	PS(O-20:0/22:6(4Z,7Z,10Z,13Z,16Z,19Z))	LMGP03020093	Lipids and lipid-like molecules	Glycerophospholipids	Glycerophosphoserines	M+H-H2O, M+Na	C48H84NO9P	43.1	34.9	-3.46645	3.85832	0.0423854	0.0896767	0.727832	1.65615	5258.09	3174.89	3536.19	4524.78	8561.53	5547.89	6171.47	3206.69	3224.7	2808.35	3337.61	2567.2	2193.23	4918.26
4.32_724.4199m/z	724.42	4.32068	pos	PS(12:0/18:3(6Z,9Z,12Z))	LMGP03010054	Lipids and lipid-like molecules	Glycerophospholipids	Glycerophosphoserines	M+Na	C36H64NO10P	37.2	7.38	5.62366	1.30482	0.000323448	0.0103444	0.753539	1.68592	365.749	216.943	368.992	363.504	369.85	317.583	404.811	369.75	223.905	251.338	108.703	213.353	208.198	296.158
3.35_517.2369n	535.27	3.34523	pos	PS(18:4(6Z,9Z,12Z,15Z)/0:0)	LMGP03050018	Lipids and lipid-like molecules	Glycerophospholipids	Glycerophosphoserines	M+H, M+NH4	C24H40NO9P	38.7	14.8	-13.8422	2.08419	0.0365691	0.0806028	0.788952	1.72782	1278.47	739.936	1561.76	1393.41	1436.14	1361.34	1050.83	867.362	1121.7	442.158	440.964	809.52	176.03	1449.24
4.94_758.4289m/z	758.429	4.94182	pos	PS(17:1(9Z)/14:0)	LMGP03010250	Lipids and lipid-like molecules	Glycerophospholipids	Glycerophosphoserines	M+K	C37H70NO10P	36.5	6.06	-11.1487	1.12539	0.003665	0.0203541	0.811178	1.75464	296.471	168.964	308.927	278.939	328.853	261.786	392.955	207.365	165.611	217.147	69.2941	168.037	180.392	213.301
4.96_860.4930m/z	860.493	4.95832	pos	PS(22:6(4Z,7Z,10Z,13Z,16Z,19Z)/17:0)	LMGP03010824	Lipids and lipid-like molecules	Glycerophospholipids	Glycerophosphoserines	M+K	C45H76NO10P	32.4	0.706	11.2048	1.05171	0.00151973	0.0137884	0.843992	1.79501	239.761	133.571	250.717	201.814	268.366	201.308	301.444	214.916	108.839	161.936	55.6106	141.819	174.54	158.681
8.19_790.5993m/z	790.599	8.193	pos	PS(P-20:0/17:0)	LMGP03030064	Lipids and lipid-like molecules	Glycerophospholipids	Glycerophosphoserines	M+H	C43H84NO9P	33.9	7.75	4.57126	2.08317	0.00762731	0.0296832	0.908994	1.87774	987.21	525.745	889.297	953.624	1463.37	724.925	953.642	938.397	518.076	357.771	269.096	643.966	449.131	916.429
4.68_706.4936m/z	706.494	4.68233	pos	PS(O-16:0/15:1(9Z))	LMGP03020006	Lipids and lipid-like molecules	Glycerophospholipids	Glycerophosphoserines	M+H	C37H72NO9P	37.9	18.2	-11.4878	1.4771	0.00646763	0.0272579	0.968596	1.95694	469.467	239.899	603.067	611.519	494.793	416.85	288.44	402.13	376.423	184.95	216.695	278.506	74.2235	308.597
4.67_662.4674m/z	662.467	4.6665	pos	PS(O-16:0/13:0)	LMGP03020002	Lipids and lipid-like molecules	Glycerophospholipids	Glycerophosphoserines	M+H-H2O	C35H70NO9P	40.8	31.5	-12.021	1.68043	0.00488732	0.0235499	1.00034	2.00048	580.642	290.252	755.034	747.013	621.771	511.958	374.305	473.77	451.789	241.454	252.949	321.881	94.1812	379.256
4.43_780.5307m/z	780.531	4.43035	pos	PS(18:4(6Z,9Z,12Z,15Z)/19:0)	LMGP03010442	Lipids and lipid-like molecules	Glycerophospholipids	Glycerophosphoserines	M+H-H2O	C43H76NO10P	41	42.8	16.6262	1.24736	0.00078822	0.0112974	1.00416	2.00577	291.084	145.123	353.886	333.504	312.205	272.792	241.683	232.433	204.392	115.612	122.275	181.161	57.0293	190.269
4.40_736.5044m/z	736.504	4.39885	pos	PS(19:0/13:0)	LMGP03010872	Lipids and lipid-like molecules	Glycerophospholipids	Glycerophosphoserines	M+H	C38H74NO10P	43.3	42.1	-10.7894	1.66318	0.00106082	0.0123606	1.06972	2.09903	500.636	238.509	605.517	622.716	524.846	461.082	386.844	402.81	358.355	194.906	193.644	284.188	86.5519	313.406
4.35_648.4519m/z	648.452	4.35202	pos	PS(O-16:0/12:0)	LMGP03020001	Lipids and lipid-like molecules	Glycerophospholipids	Glycerophosphoserines	M+H-H2O	C34H68NO9P	44.6	45.4	-12.0066	2.30917	0.000761354	0.0112752	1.07909	2.1127	942.264	446	1131.76	1142.73	999.448	872.497	744.528	762.619	644.942	361.014	348.306	527.083	171.526	623.126
4.70_750.5197m/z	750.52	4.69833	pos	PS(O-16:0/20:5(5Z,8Z,11Z,14Z,17Z))	LMGP03020074	Lipids and lipid-like molecules	Glycerophospholipids	Glycerophosphoserines	M+H-H2O	C42H74NO9P	39.8	38.1	16.7423	1.19331	0.00467712	0.0229596	1.08927	2.12766	281.241	132.183	370.956	363.959	302.307	260.82	161.575	227.828	217.352	99.6089	140.012	149.872	37.6542	148.599
3.95_622.3549m/z	622.355	3.9507	pos	1-(2-methoxy-heneicosanyl)-sn-glycero-3-phosphoserine	LMGP03060020	Lipids and lipid-like molecules	Glycerophospholipids	Glycerophosphoserines	M+K	C28H58NO9P	38.5	16.4	11.698	1.94159	0.000384214	0.0105866	1.12329	2.17844	599.437	275.168	721.164	630.021	545.93	514.295	660.821	524.389	308.131	257.645	112.959	282.195	199.204	490.875
7.70_776.5726m/z	776.573	7.70318	pos	PS(O-16:0/20:1(11Z))	LMGP03020012	Lipids and lipid-like molecules	Glycerophospholipids	Glycerophosphoserines	M+H	C42H82NO9P	34.5	2.66	-9.55088	1.37181	0.000331783	0.010348	1.8203	3.53154	232.367	65.7978	151.297	260.492	271.962	173.258	305.705	231.491	62.7006	59.623	9.93079	74.2843	36.5819	151.666
4.96_831.4705m/z	831.47	4.95832	pos	SQDG(16:0/16:1(13Z))	LMGL05010008	Lipids and lipid-like molecules	Glycerolipids	Glycosyldiradylglycerols	M+K	C41H76O12S	33.7	13.7	1.95865	1.59576	0.00203321	0.0155293	0.912626	1.88247	526.455	279.662	532.933	488.625	535.133	483.261	723.462	395.317	236.968	387.223	118.296	318.358	258.93	358.197
7.78_644.4938m/z	644.494	7.77785	pos	adenosylhopane	LMPR04000012	Lipids and lipid-like molecules	Prenol lipids	Hopanoids	M+H-H2O	C40H63N5O3	36.7	8.79	6.07301	1.16624	0.00304091	0.0185677	1.15436	2.22586	236.675	106.33	231.131	290.689	294.446	154.169	285.163	164.454	105.191	87.8766	43.7024	126.935	79.9216	194.352
13.79_271.1880m/z	271.188	13.7896	pos	7-Ethyl-3,11-dimethyl-1,3Z,6E,10E-tridecatetraene	LMFA11000124	Lipids and lipid-like molecules	Fatty Acyls	Hydrocarbons	M+K	C17H28	34.5	0.676	24.5491	2.09626	0.0155681	0.0450082	0.599034	1.5147	1475.1	973.852	1326.59	1863.83	1818.12	1471.47	1305.13	1065.43	971.591	890.164	725.544	972.092	769.383	1514.34
5.08_601.3465m/z	601.346	5.08315	pos	Rhodoxanthin	LMPR01070280	Lipids and lipid-like molecules	Prenol lipids	Isoprenoids	M+K	C40H50O2	37.5	9.86	4.00866	1.34007	0.00121861	0.0128784	0.516963	1.43094	571.238	399.205	582.236	614.362	641.028	536.272	579.744	473.788	375.783	444.332	271.265	434.252	388.416	481.182
13.91_301.1403m/z	301.14	13.9107	pos	Emmotin A	LMPR0103200001	Lipids and lipid-like molecules	Prenol lipids	Isoprenoids	M+Na	C16H22O4	39.7	7.25	-2.59059	1.5807	0.00402504	0.0213592	0.531431	1.44536	828.379	573.129	731.943	967.843	963.978	800.258	782.009	724.244	543.485	530.038	418.808	638.231	518.106	790.107
8.34_570.4575m/z	570.457	8.338	pos	alpha-Cryptoxanthin	LMPR01070268	Lipids and lipid-like molecules	Prenol lipids	Isoprenoids	M+NH4	C40H56O	33.9	9.91	-17.1769	3.17838	0.00771864	0.0298518	0.721257	1.64862	2743.25	1663.97	2344.36	3364.17	3432.48	2446.04	2444.71	2427.73	1745.23	1431.4	859.393	1992.55	1323.13	2632.11
8.31_614.4833m/z	614.483	8.30898	pos	Spirilloxanthin	LMPR01070122	Lipids and lipid-like molecules	Prenol lipids	Isoprenoids	M+NH4	C42H60O2	34.8	9.57	-16.5954	2.27635	0.00639046	0.0271013	0.762631	1.69658	1332.28	785.27	1069.51	1612.16	1700.82	1203.73	1318.03	1089.4	870.809	719.931	392.353	823.911	653.299	1251.32
4.27_637.3652m/z	637.365	4.27385	pos	Mytiloxanthin	LMPR01070010	Lipids and lipid-like molecules	Prenol lipids	Isoprenoids	M+K	C40H54O4	33.6	4.61	-0.317851	1.23972	0.000364566	0.0105414	0.890495	1.85381	286.048	154.303	319.941	273.644	274.741	230.313	340.094	277.557	161.452	144.341	84.371	159.318	144.104	232.231
4.18_630.3523n	631.36	4.18035	pos	Peridinin	LMPR01070007	Lipids and lipid-like molecules	Prenol lipids	Isoprenoids	M+H, M+NH4	C39H50O7	37.8	18.2	-5.3765	1.16432	0.000686016	0.0110474	0.894933	1.85952	260.491	140.085	335.311	235.762	250.216	208.236	294.749	238.674	158.486	144.709	69.0733	150.915	129.552	187.774
4.15_586.3277n	587.335	4.14968	pos	Presqualene diphosphate	LMPR0106010003	Lipids and lipid-like molecules	Prenol lipids	Isoprenoids	M+H, M+NH4, M+Na	C30H52O7P2	36.2	0	15.0666	1.24886	0.000185429	0.00957278	0.895005	1.85962	285.393	153.469	331.006	287.358	277.081	219.997	306.448	290.469	185.82	134.574	88.676	154.678	146.605	210.461
4.06_758.4216n	776.446	4.05653	pos	Astaxanthin glucoside	LMPR01070015	Lipids and lipid-like molecules	Prenol lipids	Isoprenoids	M+H, M+NH4	C46H62O9	38.7	23.4	-23.4585	1.7263	5.40419e-05	0.00841241	1.13276	2.19279	452.323	206.278	468.994	456.609	433.059	396.802	482.297	476.175	179.337	218.195	93.0724	176.872	220.52	349.669
4.59_710.4058m/z	710.406	4.588	pos	Oleandomycin	LMPK04000007	Lipids and lipid-like molecules	Polyketides	Macrolides and lactone polyketides	M+Na	C35H61NO12	42.2	32.6	-3.99706	1.10706	0.0286059	0.0676414	0.271956	1.20744	806.549	667.981	857.826	843.133	756.446	808.92	824.676	748.295	723.675	624.688	514.197	680.672	589.236	875.419
4.13_908.5251m/z	908.525	4.1342	pos	Avermectin A2b	LMPK04000019	Lipids and lipid-like molecules	Polyketides	Macrolides and lactone polyketides	M+NH4	C48H74O15	38.7	21.3	-12.8883	1.13065	0.0135838	0.0416239	0.701774	1.6265	362.139	222.649	387.89	373.268	385.915	197.636	399.809	428.313	268.675	142.907	133.585	247.329	339.779	203.616
3.33_756.4220m/z	756.422	3.33073	pos	Erythromycin B	LMPK04000012	Lipids and lipid-like molecules	Polyketides	Macrolides and lactone polyketides	M+K	C37H67NO12	40.6	24	-10.4907	1.11031	0.00199212	0.0154091	1.04911	2.06926	213.975	103.407	255.449	215.165	167.363	167.884	230.388	247.602	135.879	89.3903	37.3841	93.5009	74.8874	189.399
8.42_332.2928n	350.328	8.42482	pos	1-O-(2R-hydroxy-hexadecyl)-sn-glycerol	LMGL01020063	Lipids and lipid-like molecules	Glycerolipids	Monoradylglycerols	M+H, M+NH4	C19H40O4	40.1	17.5	0.420407	1.1576	0.0076843	0.0297864	0.949417	1.93109	302.759	156.781	184.799	408.18	383.733	297.04	278.285	264.521	178.72	188.551	69.8436	139.865	99.5182	264.191
8.74_711.5793n	734.568	8.74113	pos	GlcCer(d15:2(4E,6E)/20:0)	LMSP0501AA59	Lipids and lipid-like molecules	Sphingolipids	Neutral glycosphingolipids	M+Na, M+K, M+NH4	C41H77NO8	36.4	12.4	20.1647	6.50578	0.0236504	0.0594888	0.590552	1.50582	13963.8	9273.23	12335.2	15357.6	15631.8	12101.3	15711.9	12645.2	10141.5	7934.56	4983.28	8890.8	7213.21	16476
8.74_739.5897n	762.592	8.74113	pos	GlcCer(d15:2(4E,6E)/22:0)	LMSP0501AA60	Lipids and lipid-like molecules	Sphingolipids	Neutral glycosphingolipids	M+NH4, M+Na, M+K	C43H81NO8	48.6	76.4	-8.85396	7.63255	0.00422524	0.0218889	0.862011	1.81757	12852.6	7071.29	10365.6	17599.2	11556	13583.9	12678.2	11332.5	6685.34	7922.72	3474.79	6608.19	5693.09	12043.6
5.07_318.3004m/z	318.3	5.06782	pos	17-hydroxy stearic acid	LMFA02000135	Lipids and lipid-like molecules	Fatty Acyls	Octadecanoids	M+NH4	C18H36O3	52.1	66.7	0.42129	1.30938	0.00797056	0.0303715	0.72612	1.65418	435.754	263.425	503.45	532.981	496.4	358.268	367.004	356.419	311.323	230.166	227.102	221.641	156.532	433.786
4.15_428.3217m/z	428.322	4.14968	pos	mLPA(O-16:0)	LMGP00000064	Lipids and lipid-like molecules	Glycerophospholipids	Other Glycerophospholipids	M+NH4	C20H43O6P	43.5	42	19.7715	1.91661	0.000472286	0.0106076	1.49401	2.81671	511.678	181.658	686.543	626.04	533.641	407.065	405.141	411.637	296.211	110.366	119.132	225.552	56.5763	282.11
8.80_584.4732m/z	584.473	8.7983	pos	N-(hexadecanoyl)-deoxysphing-4-enine-1-sulfonate	LMSP00000002	Lipids and lipid-like molecules	Sphingolipids	Other Sphingolipids	M+H-H2O	C34H67NO5S	42	36.3	4.10002	2.29124	0.000437344	0.0106076	0.76948	1.70466	1158.06	679.351	939.017	1336.2	1242.65	1080.95	1290.16	1059.38	661.583	753.512	433.585	768.362	554.926	904.137
7.84_556.4414m/z	556.441	7.83585	pos	N-(tetradecanoyl)-deoxysphing-4-enine-1-sulfonate	LMSP00000001	Lipids and lipid-like molecules	Sphingolipids	Other Sphingolipids	M+H-H2O	C32H63NO5S	39.5	27	3.48292	1.39041	0.00364382	0.0202913	0.985913	1.98057	423.097	213.624	306.8	442.794	632.406	393.992	444.716	317.873	198.935	196.412	120.324	300.038	183.387	282.649
2.81_736.4105n	754.443	2.80942	pos	OHDdiA-PG	LMGP20060036	Lipids and lipid-like molecules	Glycerophospholipids	Oxidized glycerophospholipids	M+H, M+NH4	C36H65O13P	41.9	25.3	-7.80345	1.73937	0.0195373	0.0520703	0.256373	1.19447	1987.2	1663.67	2232.85	2150.9	1774.67	1854.5	1979.57	1930.74	1885.05	1615.72	1498.59	1734.47	1334.94	1913.24
2.75_692.3826n	710.416	2.75277	pos	PKODA-PG	LMGP20060002	Lipids and lipid-like molecules	Glycerophospholipids	Oxidized glycerophospholipids	M+NH4, M+Na, M+H	C34H61O12P	43.3	34.1	-10.718	2.57265	0.00760559	0.0296418	0.27846	1.2129	3798.02	3131.35	4292.4	4030.18	3643.1	3633.62	3599.44	3589.37	3440.33	2929.69	3057.2	3248.72	2507.15	3605.02
5.08_587.3444m/z	587.344	5.08315	pos	PON-PA	LMGP20070013	Lipids and lipid-like molecules	Glycerophospholipids	Oxidized glycerophospholipids	M+Na	C28H53O9P	35.8	7.02	22.1653	1.42294	0.00899596	0.0325288	0.367764	1.29035	1001.3	775.989	951.379	1013.6	1083.6	981.543	1126.42	851.244	702.663	897.307	524.554	833.755	831.739	865.917
5.08_620.3611m/z	620.361	5.08315	pos	OHOHA-PE	LMGP20020042	Lipids and lipid-like molecules	Glycerophospholipids	Oxidized glycerophospholipids	M+H	C30H54NO10P	39.2	7.74	8.57753	1.95911	0.00329482	0.0193552	0.396737	1.31653	1614.24	1226.13	1555.62	1679.74	1767.97	1538.88	1799.83	1343.37	1151.88	1377.89	924.11	1299.88	1187.7	1415.35
3.63_567.3221n	585.345	3.63405	pos	PG-PE	LMGP20020031	Lipids and lipid-like molecules	Glycerophospholipids	Oxidized glycerophospholipids	M+H, M+NH4	C26H50NO10P	41	19	8.51773	1.44655	0.0318071	0.0728456	0.443915	1.36029	918.212	675.012	954.66	836.457	871.966	728.699	851.634	1265.85	629.12	816.108	440.049	579.402	793.835	791.555
5.08_645.3719m/z	645.372	5.08315	pos	OHDdiA-PA	LMGP20070036	Lipids and lipid-like molecules	Glycerophospholipids	Oxidized glycerophospholipids	M+H-H2O	C33H59O11P	41.1	17.8	-6.45627	2.1824	0.00226885	0.0161786	0.499248	1.41348	1589.08	1124.24	1677.38	1648.2	1630.68	1547.6	1753.25	1277.39	1099.6	1239.23	711.32	1214	1110.24	1371.02
2.60_650.3955m/z	650.395	2.59693	pos	OA-PE	LMGP20020039	Lipids and lipid-like molecules	Glycerophospholipids	Oxidized glycerophospholipids	M+H	C32H60NO10P	44.6	47.9	-11.2506	1.56585	0.00420216	0.0218337	0.501431	1.41562	838.073	592.02	769.439	967.383	971.351	738.433	758.037	823.797	622.735	538.86	443.223	640.544	508.24	798.516
5.11_723.4116m/z	723.412	5.11432	pos	PKODA-PS	LMGP20040002	Lipids and lipid-like molecules	Glycerophospholipids	Oxidized glycerophospholipids	M+NH4	C34H60NO12P	36.2	6.81	-10.6772	1.26296	0.00295889	0.0183076	0.560541	1.47482	482.687	327.285	519.728	536.625	470.889	454.384	542.616	371.881	319.802	355.908	196.532	366.174	314.971	410.324
4.18_670.3958m/z	670.396	4.18035	pos	OKODA-PE	LMGP20020048	Lipids and lipid-like molecules	Glycerophospholipids	Oxidized glycerophospholipids	M+H-H2O	C35H62NO10P	38.4	16.4	-17.5382	1.25373	0.00344267	0.0198021	0.569386	1.48389	479.805	323.342	476.111	453.563	521.844	355.837	535.164	536.313	323.546	352.912	200.288	315.123	425.699	322.486
4.96_672.3826m/z	672.383	4.95832	pos	PHOOA-PC	LMGP20010016	Lipids and lipid-like molecules	Glycerophospholipids	Oxidized glycerophospholipids	M+Na	C32H60NO10P	35.5	11.8	-3.29761	2.1021	0.0031661	0.0189707	0.57077	1.48532	1338.58	901.211	1468.05	1326.9	1373.97	1253.9	1549.7	1058.98	881.367	1094.72	512.366	977.849	842.395	1098.57
2.51_606.3690m/z	606.369	2.51193	pos	PA-PE	LMGP20020029	Lipids and lipid-like molecules	Glycerophospholipids	Oxidized glycerophospholipids	M+H-H2O	C30H58NO10P	45.7	51.7	-12.0679	2.02845	0.000581516	0.0108512	0.593772	1.50919	1099.5	728.539	1216.83	1133.96	1189.11	1084.28	1002.45	970.372	739.375	669.352	638.315	733.583	573.137	1017.47
4.18_656.3884m/z	656.388	4.18035	pos	OON-PE	LMGP20020038	Lipids and lipid-like molecules	Glycerophospholipids	Oxidized glycerophospholipids	M+Na	C32H60NO9P	34.5	0	-2.19911	1.1328	0.00183882	0.0148427	0.635148	1.5531	341.237	219.714	341.549	336.551	362.363	245.796	388.343	372.818	221.876	219.016	133.881	222.629	289.294	231.586
4.31_695.3995m/z	695.4	4.30518	pos	OHOOA-PS	LMGP20040031	Lipids and lipid-like molecules	Glycerophospholipids	Oxidized glycerophospholipids	M+NH4	C32H56NO12P	39.6	27.4	17.2895	1.50876	0.000655689	0.010921	0.648889	1.56796	555.274	354.138	603.938	538.731	545.348	489.857	596.514	557.258	402.921	357.852	210.634	345.225	319.015	489.182
4.12_564.3180n	582.344	4.1187	pos	PHOOA-PA	LMGP20070005	Lipids and lipid-like molecules	Glycerophospholipids	Oxidized glycerophospholipids	M+H, M+NH4	C27H49O10P	35.6	2.84	20.712	1.97335	0.000393353	0.0106012	0.744773	1.67571	855.172	510.334	933.123	836.745	868.641	656.269	914.11	922.145	566.534	499.668	279.289	505.245	639.308	571.959
3.40_637.3745m/z	637.375	3.4034	pos	PA-PG	LMGP20060014	Lipids and lipid-like molecules	Glycerophospholipids	Oxidized glycerophospholipids	M+H-H2O	C31H59O12P	40.3	14.1	5.20462	1.02917	0.0096188	0.0337843	0.845978	1.79748	261.37	145.409	297.837	226.333	305.424	299.835	270.745	168.047	177.199	109.814	108.05	157.537	58.5049	261.348
3.92_582.3195n	600.342	3.92053	pos	POV-PG	LMGP20060015	Lipids and lipid-like molecules	Glycerophospholipids	Oxidized glycerophospholipids	M+H, M+NH4	C27H51O11P	37.3	0	4.44697	1.68336	0.000368103	0.0105414	1.08519	2.12165	461.387	217.466	559.18	475.308	432.05	389.023	506.408	406.353	255.561	209.648	94.1122	216.043	158.865	370.568
4.89_809.4451m/z	809.445	4.89298	pos	OHODA-PI	LMGP20050035	Lipids and lipid-like molecules	Glycerophospholipids	Oxidized glycerophospholipids	M+H	C39H69O15P	39	8.7	0.506358	1.15989	0.00501375	0.0238479	1.12113	2.17517	261.297	120.127	239.407	216.033	268.31	241.892	424.018	178.122	98.2629	144.063	47.0139	179.236	112.988	139.199
4.04_508.2880n	509.301	4.0412	pos	POV-PA	LMGP20070015	Lipids and lipid-like molecules	Glycerophospholipids	Oxidized glycerophospholipids	M+H-H2O, M+H	C24H45O9P	34.5	2.69	15.4493	1.32517	0.000117457	0.00895432	1.19104	2.28317	263.208	115.282	256.493	268.114	250.545	248.607	288.969	266.517	93.6383	131.475	45.9283	90.0833	113.246	217.319
8.02_562.3248m/z	562.325	8.02083	pos	OS-PE	LMGP20020035	Lipids and lipid-like molecules	Glycerophospholipids	Oxidized glycerophospholipids	M+H-H2O	C27H50NO10P	50.9	93.1	18.6811	1.0768	0.00137904	0.013419	1.22108	2.33121	195.856	84.0148	102.611	267.165	204.769	202.466	211.88	186.247	80.5757	72.1222	83.173	90.3712	38.5609	139.286
4.07_739.4106m/z	739.411	4.07187	pos	PKDdiA-PS	LMGP20040004	Lipids and lipid-like molecules	Glycerophospholipids	Oxidized glycerophospholipids	M+NH4	C34H60NO13P	38.9	8.37	-4.79799	1.07245	0.000207913	0.0096449	1.45458	2.74076	152.663	55.7009	185.057	168.707	141.552	124.639	172.1	123.922	61.7106	45.9724	20.5634	50.1178	39.2993	116.542
4.09_384.2954m/z	384.295	4.08737	pos	5-((4Z,7Z,10Z,13Z,16Z)-nonadeca-4,7,10,13,16-pentaen-1-yl)resorcinol	LMPK15030034	Lipids and lipid-like molecules	Polyketides	Phenolic lipids	M+NH4	C25H34O2	51.1	79.6	15.4403	1.25552	0.00038102	0.0105866	1.51993	2.86777	215.088	75.0016	285.389	261.303	217.285	185.193	160.224	181.13	114.702	51.6776	42.797	84.6309	23.0307	133.171
7.95_731.6052m/z	731.605	7.9495	pos	SM(d16:1/20:0)	LMSP03010052	Lipids and lipid-like molecules	Sphingolipids	Phosphosphingolipids	M+H	C41H83N2O6P	36.5	0.418	-1.24837	2.14003	0.0316554	0.0726563	0.844383	1.7955	1271.82	708.34	921.558	1475.41	615.897	1321.86	1603.3	1692.91	1177.22	731.036	145.007	895.403	469.914	831.46
7.93_857.6737m/z	857.674	7.93223	neg	SM(d18:2/24:0)	LMSP03010081	Lipids and lipid-like molecules	Sphingolipids	Phosphosphingolipids	M+FA-H	C47H93N2O6P	45.2	39.8	-2.06108	3.34389	0.000575858	0.0108512	2.49809	5.64936	1192.74	211.128	935.665	1623.25	1434.12	704.045	1221.03	1238.33	1.28368e-06	2.91142	0.073628	1.28368e-06	413.103	850.68
3.73_857.6737m/z	857.674	3.72562	neg	SM(d18:1/24:1(15Z))	LMSP03010007	Lipids and lipid-like molecules	Sphingolipids	Phosphosphingolipids	M+FA-H	C47H93N2O6P	45.4	34.4	-1.99242	2.78972	0.000633648	0.0109209	2.71634	6.57205	793.542	120.745	637.81	906.148	902.371	361.049	1017.82	936.059	5.34283	0.088258	1.28368e-06	1.28368e-06	146.571	572.468
3.98_629.3458m/z	629.346	3.98037	pos	Lasalocid A	LMPK09000002	Lipids and lipid-like molecules	Polyketides	Polyether antibiotics	M+K	C34H54O8	40.4	11.3	1.23872	1.40686	0.000523544	0.0106076	1.5011	2.83058	263.633	93.1376	361.767	312.753	222.286	196.979	275.001	213.014	104.958	80.1842	31.8579	96.4858	59.6923	185.648
7.51_571.3353m/z	571.335	7.5061	neg	dolichyl-4-D-xylosyl phosphate	LMPR03080011	Lipids and lipid-like molecules	Prenol lipids	Polyprenols	M-H	C30H53O8P	41.5	23.7	-9.12808	1.64415	0.00576073	0.025574	0.313256	1.24251	1298.69	1045.22	1459.83	1404.8	1133.46	1054.45	1352.53	1387.09	1100.16	1037.29	930.841	1011.54	1082.1	1109.39
8.03_585.3509m/z	585.351	8.02892	neg	1alpha,25-dihydroxy-25,25-diphenyl-26,27-dinorvitamin D3	LMST03020543	Lipids and lipid-like molecules	Sterol Lipids	Secosteroids	M+FA-H	C37H48O3	41.8	35.7	-14.1769	4.58659	0.0113809	0.0374107	0.470995	1.38606	8037.61	5798.87	6540.01	9220.62	6449.1	8147.11	10770.7	7098.11	5560.12	5173.43	5831.61	5769.51	5802.71	6655.82
1.99_385.3172m/z	385.317	1.98813	pos	22-fluorovitamin D3	LMST03020202	Lipids and lipid-like molecules	Sterol Lipids	Secosteroids	M+H-H2O	C27H43FO	41.2	40.7	-23.2123	1.82228	0.0211946	0.0551819	0.771644	1.70721	980.712	574.452	551.852	1351.64	1361.92	912.209	866.579	840.07	448.411	559.511	397.841	649.336	498.717	892.893
2.50_452.3360n	453.343	2.49777	pos	VD 2728	LMST03020643	Lipids and lipid-like molecules	Sterol Lipids	Secosteroids	M+H, M+Na, M+NH4	C30H44O3	44.7	48	15.4576	4.69545	0.0277598	0.0663164	0.854347	1.80794	6089.21	3368.04	4033.68	10278.4	7565.58	5271.46	5362.01	4024.17	3088.53	3340.9	2356.08	3667.97	2774.23	4980.52
2.36_452.3360n	453.343	2.35612	pos	(22E,24E,24bE)-1alpha,25-dihydroxy-22,23,24,24a,24b,24c-hexadehydro-24a,24b,24c-trihomovitamin D3	LMST03020447	Lipids and lipid-like molecules	Sterol Lipids	Secosteroids	M+H, M+NH4	C30H44O3	45.6	54.1	15.3492	3.53466	0.0408534	0.0874146	0.891726	1.85539	3494.51	1883.43	2281.74	6518.16	4006.81	2918.86	2906.09	2335.37	1858.56	1948.78	1310.48	1965.33	1476.87	2740.57
4.54_486.3633m/z	486.363	4.541	pos	1alpha,25-dihydroxy-11-(3-hydroxy-1-propynyl)-9,11-didehydrovitamin D3	LMST03020448	Lipids and lipid-like molecules	Sterol Lipids	Secosteroids	M+NH4	C30H44O4	44.1	47	11.8668	1.61726	0.00243452	0.0167218	1.23149	2.3481	445.361	189.669	572.826	578.012	490.285	375.796	279.755	375.495	299.645	146.934	140.324	220.98	43.096	287.036
4.97_692.3851m/z	692.385	4.97465	pos	Fumonisin C2	LMSP01080028	Lipids and lipid-like molecules	Sphingolipids	Sphingoid bases	M+H	C33H57NO14	37.3	0	-0.106795	1.35227	0.00262004	0.0172711	0.612204	1.52859	515.63	337.323	550.797	484.861	518.871	485.79	626.352	427.106	346.016	398.428	185.115	369.348	299.674	425.357
8.19_352.3215m/z	352.322	8.193	pos	Aplidiasphingosine	LMSP01080016	Lipids and lipid-like molecules	Sphingolipids	Sphingoid bases	M+H-H2O	C22H43NO3	52.3	74.8	1.37577	1.23669	0.0209345	0.0546764	0.846272	1.79785	386.269	214.851	412.09	500.023	412.269	259.994	447.657	285.581	248.4	322.633	57.768	275.982	66.9749	317.346
6.19_382.2715m/z	382.271	6.1926	pos	Sphinganine-phosphate	LMSP01050002	Lipids and lipid-like molecules	Sphingolipids	Sphingoid bases	M+H	C18H40NO5P	50.9	63.4	-0.515717	1.07322	0.000358487	0.0105414	1.96869	3.91413	147.715	37.7388	143.609	164.533	236.166	120.139	111.683	110.159	66.3786	31.6632	31.0643	40.1468	15.2506	41.9293
2.31_472.2516n	490.285	2.31362	pos	Chenodeoxycholic acid sulfate	LMST05020026	Lipids and lipid-like molecules	Sterol Lipids	Steroid conjugates	M+H, M+K, M+NH4, M+Na	C24H40O7S	43.9	32.4	4.50569	5.50456	0.0182878	0.0499359	0.345306	1.27042	15280.1	12027.6	17845.6	16314.3	14160.8	14300.2	15246.2	13813.7	14187.2	10767.3	10466.5	12637.1	8976.06	15131.6
5.08_653.3825m/z	653.383	5.08315	pos	Kurilensoside F	LMST05050015	Lipids and lipid-like molecules	Sterol Lipids	Steroid conjugates	M+Na	C33H58O11	36.9	24.1	-7.293	1.77139	0.014635	0.0434072	0.393813	1.31386	1524.73	1160.49	1561.19	1508.24	1624.07	1436.99	1815.08	1202.78	1005.54	1410.22	793.694	1251.09	1305.44	1196.97
5.08_733.4230m/z	733.423	5.08315	pos	Kurilensoside J	LMST05050020	Lipids and lipid-like molecules	Sterol Lipids	Steroid conjugates	M+H	C37H64O14	44.9	54.2	-18.8999	2.00599	0.00998315	0.0344541	0.412147	1.33066	1795.68	1349.46	1865.09	1784.4	1926.54	1699.72	2059.73	1438.58	1209.98	1609.71	871.104	1513.47	1400.64	1491.85
2.21_474.2905m/z	474.291	2.21428	pos	lithocholic acid sulfate	LMST05020015	Lipids and lipid-like molecules	Sterol Lipids	Steroid conjugates	M+NH4	C24H40O6S	49.4	63.3	4.67424	2.54022	0.00117182	0.0126878	0.48923	1.4037	2057.55	1465.81	2025.09	2312.26	2049.1	2003.36	2079.24	1876.26	1572.12	1317.02	1158.28	1514.51	1266.88	1966.04
4.96_661.3801m/z	661.38	4.95832	pos	Glycocholic acid 3-glucuronide	LMST05010023	Lipids and lipid-like molecules	Sterol Lipids	Steroid conjugates	M+NH4	C32H53NO12	44.7	61.2	-16.2826	1.50597	0.00124449	0.0129706	0.490422	1.40486	742.686	528.657	733.42	724.411	733.632	737.462	855.798	671.395	524.401	576.94	358.891	584.347	478.772	648.591
8.86_496.4208m/z	496.421	8.85563	pos	Dendrogenin A	LMST05050025	Lipids and lipid-like molecules	Sterol Lipids	Steroid conjugates	M+H-H2O	C32H55N3O2	41.2	33.8	-10.3362	2.0347	0.0122938	0.0391338	0.63245	1.5502	1352.13	872.232	1012.84	1677.67	1546.87	1486.28	1278.57	1110.56	1059.62	777.59	523.686	973.476	621.514	1277.5
1.52_361.1167m/z	361.117	1.52422	neg	2-Methoxyestrone 3-sulfate	LMST05020006	Lipids and lipid-like molecules	Sterol Lipids	Steroid conjugates	M-H2O-H	C19H24O6S	36.4	3.3	13.5555	1.70828	0.0391424	0.0847003	0.652713	1.57212	1028.92	654.479	1008.33	874.857	737.24	1140.05	1470.18	942.862	919.193	432.364	551.095	970.957	242.973	810.295
3.63_755.4013m/z	755.401	3.63405	pos	Evasterioside E	LMST05050010	Lipids and lipid-like molecules	Sterol Lipids	Steroid conjugates	M+K	C37H64O13	36.4	23	4.76414	1.11228	0.0168185	0.0472729	0.897608	1.86297	301.555	161.868	383.469	303.909	354.512	301.073	266.703	199.665	235.687	93.8519	108.9	189.461	36.7884	306.517
1.96_585.3260m/z	585.326	1.9598	pos	Cholic acid glucuronide	LMST05010044	Lipids and lipid-like molecules	Sterol Lipids	Steroid conjugates	M+H	C30H48O11	46.8	44.2	-1.6556	2.10359	0.0013042	0.0131972	1.07919	2.11284	818.143	387.224	611.723	832.436	882.216	899.54	1026.74	656.206	410.6	326.061	260.79	543.045	148.603	634.244
5.08_624.3471n	642.37	5.08315	pos	Spongipregnoloside B	LMST02030218	Lipids and lipid-like molecules	Sterol Lipids	Steroids	M+H, M+NH4	C33H52O11	41.4	27	-6.17168	2.0402	0.00334234	0.0194393	0.356827	1.28061	1937.5	1512.96	1946.99	1925.66	1979.82	1901.65	2167.47	1703.44	1391.29	1718.51	1106.38	1634.61	1589.99	1636.97
1.68_344.2040n	327.201	1.68132	pos	11-Dehydrocorticosterone	LMST02030192	Lipids and lipid-like molecules	Sterol Lipids	Steroids	M+H-H2O, M+H	C21H28O4	43.2	44.5	15.1121	1.19751	0.024492	0.0610005	0.894131	1.85849	398.086	214.198	406.54	368.845	296.298	572.653	471.365	272.813	318.398	115.868	136.187	363.241	52.6324	298.864
4.18_347.2217m/z	347.222	4.18035	pos	corticosterone	LMST02030186	Lipids and lipid-like molecules	Sterol Lipids	Steroids	M+H	C21H30O4	51	57.4	0.0779124	1.25404	0.0376	0.0822598	1.35834	2.5639	366.68	143.016	350.924	387.44	741.964	155.268	170.639	393.847	145.803	120.35	169.433	289.423	96.4184	36.6711
2.43_516.2778n	534.312	2.42693	pos	ajugalactone	LMST01040152	Lipids and lipid-like molecules	Sterol Lipids	Sterols	M+NH4, M+Na, M+H	C29H40O8	45.5	45.1	10.5268	5.49454	0.0134555	0.0413883	0.351817	1.27617	14702.1	11520.5	17038.9	16074.6	13402.5	13996.7	14479.9	13219.8	13630.9	10686.6	9669.26	12087.5	8957.59	14091
2.63_680.4423m/z	680.442	2.62527	pos	cimicifoetiside A	LMST01100006	Lipids and lipid-like molecules	Sterol Lipids	Sterols	M+NH4	C37H58O10	46	49.4	8.20086	2.53291	0.001365	0.0133755	0.383704	1.30469	2622.4	2009.98	2232.68	2925.62	2602.16	2734.08	2861.89	2377.98	1928.99	1975.98	1971.86	2046	1757.24	2379.85
2.55_636.4158m/z	636.416	2.55443	pos	2alpha,7beta,15beta,18-tetraacetoxy-cholest-5-en-3alpha-ol	LMST01010312	Lipids and lipid-like molecules	Sterol Lipids	Sterols	M+NH4	C35H54O9	45.2	45.3	8.46686	2.8383	0.000519698	0.0106076	0.385821	1.3066	3230.44	2472.39	2876.36	3476.87	3543.45	3182.49	3305.71	2997.74	2550.55	2332.45	2263.42	2706.93	2164.83	2816.18
2.53_374.2392n	357.236	2.5261	pos	Digitoxigenin	LMST01120001	Lipids and lipid-like molecules	Sterol Lipids	Sterols	M+H-H2O, M+Na	C23H34O4	40.9	39.4	-17.2723	2.2721	0.0107894	0.03622	0.772745	1.70852	1430.64	837.357	1020.55	1462	1434.57	1545.83	1830.48	1290.4	1050.07	639.523	623.966	1333.24	301.659	1075.68
2.77_462.2915n	445.288	2.76692	pos	3-dehydroecdysone	LMST01010172	Lipids and lipid-like molecules	Sterol Lipids	Sterols	M+H-H2O, M+Na	C27H42O6	36.8	19.6	-14.3023	1.36114	0.00390359	0.0209914	0.789294	1.72823	464.973	269.046	398.411	491.946	456.5	518.434	534.543	390.005	368.365	215.061	183.238	387.08	113.867	346.665
4.21_675.3847m/z	675.385	4.21118	pos	Fasciculic acid B	LMST01010389	Lipids and lipid-like molecules	Sterol Lipids	Sterols	M+K	C36H60O9	31.6	10.3	-3.50121	1.13388	0.000981625	0.0120092	0.845916	1.79741	255.082	141.917	300.827	241.023	221.811	202.801	302.092	261.94	156.365	149.248	71.7416	147.013	120.985	206.148
1.96_433.2838m/z	433.284	1.9598	pos	ergosta-5,7,22,24(28)-tetraen-3beta-ol	LMST01031015	Lipids and lipid-like molecules	Sterol Lipids	Sterols	M+K	C28H42O	35.8	0	-7.48954	1.52616	0.0052698	0.0244035	0.856764	1.81097	545.636	301.295	455.712	517.463	517.955	575.748	701.549	505.389	412.042	204.754	210.229	442.457	105.159	433.126
2.19_520.3110n	521.336	2.18612	pos	cyasterone	LMST01040153	Lipids and lipid-like molecules	Sterol Lipids	Sterols	M+H-H2O, M+H	C29H44O8	48.9	81	14.1235	1.61379	0.00357607	0.0201233	0.905295	1.87293	576.129	307.609	650.302	503.334	489.916	640.524	738.614	434.087	353.231	303.283	212.661	488.994	121.461	366.025
2.50_534.3456m/z	534.346	2.49777	pos	Ganoderic acid B	LMST01010392	Lipids and lipid-like molecules	Sterol Lipids	Sterols	M+NH4	C30H44O7	46.2	53	5.93461	1.983	0.000101495	0.00880989	0.964916	1.95195	689.214	353.09	703.317	796.697	604.019	558.993	740.239	732.022	443.133	398.598	169.844	393.202	322.36	391.403
2.58_578.3722m/z	578.372	2.58277	pos	Cucurbitacin Q	LMST01010115	Lipids and lipid-like molecules	Sterol Lipids	Sterols	M+NH4	C32H48O8	41.1	34.7	6.17928	2.14614	3.50753e-05	0.00841241	0.984162	1.97816	793.447	401.103	898.474	857.393	746.022	704.854	803.548	750.393	427.986	541.592	193.438	442.044	384.428	417.128
4.07_780.4351n	798.46	4.07187	pos	Digoxin	LMST01120023	Lipids and lipid-like molecules	Sterol Lipids	Sterols	M+H, M+NH4	C41H64O14	40.7	20.9	7.03776	1.69285	0.000116295	0.00895432	1.02992	2.04191	467.617	229.01	542.573	457.602	433.414	377.316	519.593	475.203	220.26	235.292	110.426	209.836	255.642	342.605
7.01_921.6892m/z	921.689	7.00805	pos	22:1-Glc-Campesterol	LMST01031140	Lipids and lipid-like molecules	Sterol Lipids	Sterols	M+K	C56H98O7	36.3	3.64	-5.95235	1.81001	0.00857873	0.0316434	1.07226	2.10272	719.069	341.971	606.127	896.227	1199.6	525.161	498.345	588.957	369.484	408.224	224.745	368.116	298.071	383.186
11.69_446.3759n	429.373	11.6852	pos	Nebrosteroid M	LMST01031113	Lipids and lipid-like molecules	Sterol Lipids	Sterols	M+H-H2O, M+H	C29H50O3	45	50.4	-0.200493	2.70091	0.00312605	0.0188516	1.09686	2.13889	1513.82	707.759	1217.2	1381.5	2153.77	1543.97	1252.39	1534.08	1438.68	727.519	368.304	486.7	579.508	645.845
8.51_399.3257m/z	399.326	8.51115	pos	Dormatinone	LMST01010100	Lipids and lipid-like molecules	Sterol Lipids	Sterols	M+H-H2O	C27H44O3	51.3	63.3	-0.0822795	2.11266	0.00760346	0.0296418	2.32136	4.99802	642.475	128.546	355.81	709.192	1329.66	442.338	334.615	683.237	193.604	108.932	57.648	97.4517	99.6924	213.947
0.55_974.8130m/z	974.813	0.553533	pos	TG(18:3(6Z,9Z,12Z)/20:0/22:6(4Z,7Z,10Z,13Z,16Z,19Z))[iso6]	LMGL03016429	Lipids and lipid-like molecules	Glycerolipids	Triradylglycerols	M+NH4	C63H104O6	32.2	5.89	-4.32512	1.06726	0.0209719	0.0547428	1.14782	2.21578	238.68	107.718	177.707	430.938	296.353	179.75	209.362	137.971	71.85	93.2358	97.7123	111.616	76.6093	195.285
7.14_857.6731m/z	857.673	7.14428	neg	TG(12:0/18:3(9Z,12Z,15Z)/19:1(9Z))[iso6]	LMGL03013521	Lipids and lipid-like molecules	Glycerolipids	Triradylglycerols	M+FA-H	C52H92O6	36	24.6	-17.7727	1.15219	0.000616128	0.0109209	2.63256	6.20124	139.938	22.5661	108.017	218.181	164.497	79.4	144.441	125.09	1.28368e-06	13.4266	2.20812	1.28368e-06	35.2957	84.4662
6.93_857.6737m/z	857.674	6.92895	neg	TG(13:0/14:0/22:4(7Z,10Z,13Z,16Z))[iso6]	LMGL03013699	Lipids and lipid-like molecules	Glycerolipids	Triradylglycerols	M+FA-H	C52H92O6	35.8	25.5	-17.1504	1.15099	0.00102568	0.0122109	2.7524	6.73839	141.543	21.0055	101.253	203.257	196.419	83.1267	130.858	134.345	1.28368e-06	1.28368e-06	1.28368e-06	1.28368e-06	20.8815	105.151
6.36_857.6737m/z	857.674	6.36498	neg	TG(12:0/17:1(9Z)/20:3(8Z,11Z,14Z))[iso6]	LMGL03013408	Lipids and lipid-like molecules	Glycerolipids	Triradylglycerols	M+FA-H	C52H92O6	35	19.4	-17.095	2.13758	0.000771723	0.0112752	2.95888	7.77519	462.821	59.5254	353.615	567.618	616.917	167.243	557.72	513.814	1.28368e-06	1.28368e-06	1.28368e-06	1.28368e-06	61.4076	295.745
8.28_658.5092m/z	658.509	8.27998	pos	(2S,3R,4E,8E)-3-Hydroxy-2-[methyl(stearoyl)amino]-4,8-octadecadien-1-yl hydrogen sulfate	LMSP00000025	Unclassified	Unclassified	Unclassified	M+H	C37H71NO6S	41.3	27.6	2.66736	2.0349	0.0055505	0.02505	0.814445	1.75862	1005.89	571.976	775.537	1223.93	1274.1	892.27	1058.58	810.921	620.425	503.631	277.209	680.657	447.984	901.948
7.81_600.4676m/z	600.468	7.80752	pos	Sulfobacin A	LMSP00000024	Unclassified	Unclassified	Unclassified	M+H-H2O	C34H67NO6S	39.9	23.9	3.14662	1.27121	0.00609593	0.0263778	1.01802	2.02513	335.866	165.849	261.569	443.253	456.305	257.48	351.903	244.688	186.569	152.773	59.6285	202.559	122.925	270.64
7.94_814.6860m/z	814.686	7.93517	pos	GlcCer(d17:0(16Me)/23:0(2OH[R]))	LMSP05010082	Unclassified	Unclassified	Unclassified	M+H-H2O	C47H93NO10	35.7	7.27	11.2345	3.74805	0.000295488	0.0102893	2.57743	5.96874	1493.44	250.21	1285.39	2031.26	2001.79	871.633	1637.65	1132.9	1.28368e-06	0.235793	1.28368e-06	306.746	492.481	701.795
3.66_360.2256n	378.259	3.66322	pos	Maresin 1	LMFA04050001	Lipids and lipid-like molecules	Fatty Acyls	Docosanoids	M+H, M+NH4	C22H32O4	37.7	16.2	-12.4209	1.11397	0.0196111	0.0522263	-0.348824	0.785224	541.13	689.141	544.277	480.57	485.527	556.485	579.976	599.944	612.537	735.944	908.818	642.685	665.391	569.469
5.61_375.2533m/z	375.253	5.60535	neg	DPA	LMFA04000044	Lipids and lipid-like molecules	Fatty Acyls	Docosanoids	M+FA-H	C22H34O2	45.4	34.1	-2.34131	1.0102	0.0448245	0.09476	-23.976	6.06039e-08	1.28368e-06	21.1815	1.28368e-06	1.28368e-06	1.28368e-06	1.28368e-06	1.28368e-06	1.28368e-06	6.80247	10.848	1.1332	33.7663	2.48339	72.0555
7.81_643.3432m/z	643.343	7.80752	pos	LTC4	LMFA03020003	Lipids and lipid-like molecules	Fatty Acyls	Eicosanoids	M+NH4	C30H47N3O9S	38.9	18.5	9.65739	2.34331	0.0144029	0.0429421	-2.62878	0.16168	121.365	750.646	122.997	91.1617	29.7494	147.858	25.7343	310.688	663.1	486.606	1753.25	550.076	726.563	324.28
7.41_625.3133n	643.343	7.41203	pos	11-trans-LTC4	LMFA03020020	Lipids and lipid-like molecules	Fatty Acyls	Eicosanoids	M+H, M+NH4	C30H47N3O9S	34.6	3.93	15.9257	2.11854	0.0112463	0.0372275	-2.31439	0.201048	126.084	627.131	141.288	126.785	41.1689	179.676	46.5122	221.071	513.687	413.412	1384.89	477.927	664.369	308.497
6.13_335.2222m/z	335.222	6.13117	neg	Troxilin B3	LMFA03090004	Lipids and lipid-like molecules	Fatty Acyls	Eicosanoids	M-H2O-H	C20H34O5	45.4	39.4	-1.76227	1.30369	0.00017657	0.0094268	-1.41721	0.374435	90.0082	240.384	44.4639	85.4663	99.423	63.1285	104.687	142.881	253.043	234.738	307.918	287.365	181.859	177.38
6.39_336.2297n	335.222	6.39465	neg	11-deoxy-PGE2	LMFA03010061	Lipids and lipid-like molecules	Fatty Acyls	Eicosanoids	M-H2O-H, M-H	C20H32O4	46.4	37	-0.947527	3.46325	0.00012293	0.00913906	-1.41381	0.37532	637.161	1697.65	268.065	642.115	768.469	389.883	749.96	1004.48	1584.32	1752.5	2097.15	2061.06	1309.5	1381.36
4.81_353.2326m/z	353.233	4.81405	neg	Trioxilin A3	LMFA03090002	Lipids and lipid-like molecules	Fatty Acyls	Eicosanoids	M-H	C20H34O5	43.8	26.6	-2.21999	1.50873	0.000363492	0.0105414	-1.31081	0.403096	146.871	364.359	39.6743	167.944	175.151	88.0554	199.74	210.664	338.76	351.325	489.572	353.937	260.903	391.655
7.07_320.2350n	319.227	7.07312	neg	8-HETE	LMFA03060086	Lipids and lipid-like molecules	Fatty Acyls	Eicosanoids	M-H2O-H, M-H	C20H32O3	53.2	67.3	-0.325587	6.48278	0.00888794	0.0322857	-0.82187	0.565708	5973.48	10559.3	2679.99	4907.06	6509.11	3841.48	7299.63	10603.6	9802.07	10903.3	13451.1	12014.1	9375.03	7810.18
7.64_347.2584m/z	347.258	7.63625	neg	18-fluoro-octadecanoic acid	LMFA01090045	Lipids and lipid-like molecules	Fatty Acyls	Fatty Acids and Conjugates	M+FA-H	C18H35FO2	45.2	35.4	-6.2054	1.0762	0.00323092	0.0191574	-1.15898	0.447829	93.1946	208.103	31.4477	90.1528	117.824	49.8068	104.27	165.666	215.653	214.841	288.706	228.567	177.038	123.814
0.97_103.0398m/z	103.04	0.971417	neg	4-hydroxy-butyric acid	LMFA01050006	Lipids and lipid-like molecules	Fatty Acyls	Fatty Acids and Conjugates	M-H	C4H8O3	54.7	76.6	-2.23455	1.14706	0.0252254	0.0620904	-0.430944	0.741776	407.747	549.69	459.223	413.88	477.956	395.7	333.639	366.083	585.336	549.693	499.354	626.358	693.185	344.215
5.60_720.7407n	703.737	5.60295	pos	Hydroxyphthioceranic acid (C48)	LMFA01020331	Lipids and lipid-like molecules	Fatty Acyls	Fatty Acids and Conjugates	M+H-H2O, M+H	C48H96O3	37.1	4.33	6.54051	1.78081	0.00205487	0.0155923	-0.318899	0.801681	1216.23	1517.09	1196.4	1219.19	1033.59	1403.6	1161.62	1282.96	1351.76	1540.6	1569.5	1622.53	1652.75	1365.42
5.62_676.7161n	659.713	5.61862	pos	hexatetracontanoic acid	LMFA01010039	Lipids and lipid-like molecules	Fatty Acyls	Fatty Acids and Conjugates	M+H-H2O, M+H	C46H92O2	37.3	4.64	9.34389	1.83351	0.00787387	0.0301665	-0.237618	0.848145	1922.92	2267.2	1851.01	1947.03	1644.57	2184.41	1820.59	2089.89	2101.61	2312.32	2224.28	2482.51	2407.87	2074.63
7.60_841.4603m/z	841.46	7.60002	pos	3-O-(2-O-(2E-decenoyl)-alpha-L-rhamnopyranosyl-(1-2)-alpha-L-rhamnopyranosyl)-3-hydroxydecanoic acid	LMFA13030007	Lipids and lipid-like molecules	Fatty Acyls	Fatty acyl glycosides	M+K	C42H74O14	33.8	1.45	-13.3791	1.67943	0.0146689	0.0434795	-3.02819	0.122581	45.0854	367.801	40.6974	34.1803	4.48196	65.5771	17.9994	107.576	262.241	275.669	878.521	245.041	413.818	131.516
4.34_405.1757m/z	405.176	4.34225	neg	1-O-(8R-hydroxy-8-methyl-3Z,9-decadienoyl)-beta-D-glucopyranose	LMFA13010039	Lipids and lipid-like molecules	Fatty Acyls	Fatty acyl glycosides	M+FA-H	C17H28O8	41.7	12.8	-2.60356	3.41312	0.000397639	0.0106076	-1.33791	0.395593	745.286	1883.97	847.922	612.014	1121.92	503.961	709.305	676.591	1657.55	1858.73	2031.47	2022.65	1122.68	2610.73
6.66_522.2842n	540.294	6.65673	pos	14-O-(beta-D-glucopyranosyl)-7S,14R-dihydroxy-7,9,13,17-tetramethyl-2E,4E,8E,10E,12E,16E-octadecahexaenoic acid	LMFA13010034	Lipids and lipid-like molecules	Fatty Acyls	Fatty acyl glycosides	M+H, M+NH4	C28H42O9	40.6	13.9	2.55285	1.86751	0.00598922	0.0260892	-1.19186	0.437739	283.005	646.516	279.58	257.945	122.702	387.347	196.446	454.009	662.773	471.885	1056.45	694.136	563.421	430.431
7.46_599.3163m/z	599.316	7.45737	pos	Deferoxamine	LMFA08020169	Lipids and lipid-like molecules	Fatty Acyls	Fatty amides	M+K	C25H48N6O8	40.9	19	-0.405587	1.64617	0.00910339	0.032764	-2.19108	0.218988	83.5119	381.353	88.0232	83.5685	25.9247	112.341	31.1592	160.055	331.706	260.299	815.02	294.572	379.667	206.857
3.32_618.3686n	636.398	3.31623	pos	desferrioxamine G	LMFA08020171	Lipids and lipid-like molecules	Fatty Acyls	Fatty amides	M+H, M+NH4	C27H50N6O10	40.7	29.9	15.8294	1.24275	0.0115514	0.0377886	-2.098	0.233582	53.3657	228.467	66.996	49.3952	28.113	65.268	40.8614	69.5608	134.324	249.199	472.798	118.896	276.531	119.052
7.70_555.2901m/z	555.29	7.70318	pos	IC202C	LMFA08020184	Lipids and lipid-like molecules	Fatty Acyls	Fatty amides	M+K	C23H44N6O7	40.8	16.3	-0.426873	1.686	0.00896116	0.0324483	-1.98643	0.252362	105.886	419.579	117.9	110.706	40.2485	134.772	36.9645	194.725	402.244	262.175	874.022	342.303	374.342	262.389
3.08_504.3199m/z	504.32	3.08275	pos	N-(2'-(4-benzenesulfonamide)-ethyl) arachidonoyl amine	LMFA08020053	Lipids and lipid-like molecules	Fatty Acyls	Fatty amides	M+NH4	C28H42N2O3S	40.4	35.6	-11.4726	1.56293	0.0260947	0.0634907	-1.67373	0.313441	137.711	439.352	203.941	157.202	96.0978	119.407	98.3094	151.309	248.363	567.157	842.339	192.807	629.532	155.913
2.41_430.2648m/z	430.265	2.41278	pos	N,N-(2,2-dihydroxy-ethyl) arachidonoyl amine	LMFA08020028	Lipids and lipid-like molecules	Fatty Acyls	Fatty amides	M+K	C24H41NO3	41.2	40.9	-17.7994	1.2116	0.00821561	0.0308967	-0.950138	0.517583	180.417	348.576	314.168	195.365	107.77	115.032	86.9013	263.266	405.18	352.163	470.163	263.431	352.254	248.267
2.94_427.2546n	445.288	2.93858	pos	Anandamide 0-phosphate	LMFA08020002	Lipids and lipid-like molecules	Fatty Acyls	Fatty amides	M+H, M+NH4	C22H38NO5P	35.5	2.76	13.5989	2.55963	0.0198208	0.0526413	-0.213947	0.862175	4795.25	5561.8	4916.35	4763.61	4267.78	4891.97	4910.33	5021.44	5255.4	6021.63	6287.77	5263.09	5920.01	4622.9
7.43_552.6434m/z	552.643	7.42703	pos	11,15,19-Trimethylpentatriacontane	LMFA11000191	Lipids and lipid-like molecules	Fatty Acyls	Hydrocarbons	M+NH4	C38H78	34.4	0	-1.41951	1.05372	0.0136173	0.0416516	-2.7888	0.144706	21.3126	147.282	25.4485	16.9172	2.69557	33.9501	3.10635	45.758	110.806	106.07	342.484	98.9428	167.382	58.0056
6.30_534.6095n	552.643	6.30225	pos	11,15,23-Trimethylpentatriacontane	LMFA11000194	Lipids and lipid-like molecules	Fatty Acyls	Hydrocarbons	M+NH4, M+K	C38H78	34.1	0	-1.62258	1.12235	0.000644983	0.0109209	-1.21476	0.430844	87.9137	204.05	90.3559	72.6666	42.9952	115.1	64.4613	141.904	209.969	177.248	283.15	205.578	203.804	144.551
5.65_562.6393n	580.662	5.64945	pos	11,15,19-Trimethylheptatriacontane	LMFA11000190	Lipids and lipid-like molecules	Fatty Acyls	Hydrocarbons	M+H-H2O, M+NH4	C40H82	37.7	0	-4.17981	1.02775	0.0040925	0.021484	-0.373033	0.772157	357.58	463.092	374.525	376.724	257.913	409.704	331.954	394.66	466.25	453.211	452.189	524.944	485.695	396.262
7.06_605.4565m/z	605.456	7.06472	pos	DG(15:1(9Z)/17:0/0:0)[iso2]	LMGL02010452	Lipids and lipid-like molecules	Glycerolipids	Diradylglycerols	M+K	C35H66O5	38.4	13.3	4.06164	1.05911	0.0328539	0.0746066	-1.45599	0.364504	82.0025	224.97	12.574	51.2503	66.3062	10.6725	63.3977	287.815	217.083	245.448	310.983	342.687	92.2304	141.389
13.82_816.5571n	861.549	13.8153	neg	1-(9Z-octadecenoyl)-2-(5Z,8Z,11Z,14Z-eicosatetraenoyl)-3-O-alpha-D-glucuronyl-sn-glycerol	LMGL05010002	Lipids and lipid-like molecules	Glycerolipids	Glycosyldiradylglycerols	M-H, M+FA-H	C47H76O11	36.9	12.2	22.4098	1.30369	0.00158768	0.014012	-0.795783	0.57603	221.981	385.364	208.563	200.881	338.886	164.147	225.227	194.184	353.392	451.091	493.232	369.053	324.905	320.511
2.82_766.4559n	784.49	2.82375	pos	MGDG(18:5(3Z,6Z,9Z,12Z,15Z)/18:5(3Z,6Z,9Z,12Z,15Z))	LMGL05010012	Lipids and lipid-like molecules	Glycerolipids	Glycosyldiradylglycerols	M+NH4, M+K, M+Na, M+H	C45H66O10	42.1	34.3	-12.6579	3.0475	0.0153784	0.0445882	-0.145173	0.904271	10847.9	11996.2	11106.5	10816.6	9778.23	10513.6	11374.1	11498.2	11527.6	12039.7	13234.4	11750.8	12282.7	11142.3
5.91_980.5536m/z	980.554	5.90927	pos	CDP-DG(18:1(9Z)/16:0)	LMGP13010029	Lipids and lipid-like molecules	Glycerophospholipids	CDP-Glycerols	M+H	C46H83N3O15P2	33.4	0.0595	16.7245	1.24365	0.00185533	0.014923	-0.679261	0.624485	245.635	393.341	241.677	244.919	185.169	270.283	225.894	305.871	329.13	409.512	445.414	409.912	486.441	279.637
6.60_679.3637m/z	679.364	6.5994	pos	PA(14:1(9Z)/18:3(6Z,9Z,12Z))	LMGP10010120	Lipids and lipid-like molecules	Glycerophospholipids	Glycerophosphates	M+K	C35H61O8P	33.1	1.78	-15.4442	1.02686	0.000145289	0.00919401	-2.07941	0.236611	28.7036	121.311	19.8907	22.6579	10.4111	42.6458	21.2694	55.3465	126.022	75.282	167.118	150.86	114.764	93.8211
6.83_679.3626m/z	679.363	6.83473	pos	PA(14:0/18:4(6Z,9Z,12Z,15Z))	LMGP10010927	Lipids and lipid-like molecules	Glycerophospholipids	Glycerophosphates	M+K	C35H61O8P	32.7	6.16	-17.1096	1.33159	0.00291238	0.0181854	-1.64402	0.319963	82.5668	258.051	90.9875	91.819	28.7142	97.1287	42.3634	144.388	270.151	206.244	431.575	294.081	212.196	134.058
6.51_655.3712m/z	655.371	6.51242	pos	PA(13:0/17:2(9Z,12Z))	LMGP10010073	Lipids and lipid-like molecules	Glycerophospholipids	Glycerophosphates	M+K	C33H61O8P	34.6	1.62	-3.76677	1.1826	0.00465014	0.0229146	-1.4401	0.368542	81.7961	221.945	96.8609	37.5321	31.7017	139.986	33.5022	151.194	219.348	205.084	350.413	188.79	250.492	117.542
6.35_679.3752m/z	679.375	6.34742	pos	PA(18:4(6Z,9Z,12Z,15Z)/14:0)	LMGP10010425	Lipids and lipid-like molecules	Glycerophospholipids	Glycerophosphates	M+K	C35H61O8P	37.5	0	2.56341	1.29671	0.00133671	0.0132808	-1.27178	0.414148	115.109	277.942	149.025	92.0359	39.0789	143.02	91.018	176.478	276.418	242.561	412.181	249.478	298.538	188.477
6.53_731.3956m/z	731.396	6.52708	pos	PA(18:2(9Z,12Z)/18:4(6Z,9Z,12Z,15Z))	LMGP10010351	Lipids and lipid-like molecules	Glycerophospholipids	Glycerophosphates	M+K	C39H65O8P	36.5	4.11	-13.3848	1.51183	0.00123702	0.0129679	-0.979253	0.507242	226.974	447.466	214.879	216.609	132.004	254.4	185.19	358.762	482.266	344.033	598.946	486.035	407.157	366.361
6.22_655.3699m/z	655.37	6.22408	pos	PA(12:0/18:2(9Z,12Z))	LMGP10010051	Lipids and lipid-like molecules	Glycerophospholipids	Glycerophosphates	M+K	C33H61O8P	36.2	0	-5.901	1.86594	0.00077741	0.0112752	-0.975436	0.508586	336.013	660.681	355.399	346.679	193.017	426.224	244.713	450.047	635.674	593.227	899.053	648.279	690.202	497.653
6.33_731.3949m/z	731.395	6.33258	pos	PA(18:3(6Z,9Z,12Z)/18:3(6Z,9Z,12Z))	LMGP10010378	Lipids and lipid-like molecules	Glycerophospholipids	Glycerophosphates	M+K	C39H65O8P	31.4	1.79	-14.4297	1.58991	0.00267764	0.0174488	-0.671185	0.627991	434.922	692.561	532.071	492.621	277.289	490.916	276.066	540.568	775.924	545.996	810.651	739.129	644.767	638.896
6.08_679.3777m/z	679.378	6.08193	pos	PA(12:0/20:4(5Z,8Z,11Z,14Z))	LMGP10010060	Lipids and lipid-like molecules	Glycerophospholipids	Glycerophosphates	M+K	C35H61O8P	35.1	2.38	6.40591	1.4232	0.00387676	0.0209458	-0.377457	0.769793	710.608	923.116	814.859	725.892	497.479	810.287	621.223	793.911	954.928	835.848	979.739	970.761	913.157	884.264
3.27_614.3855m/z	614.385	3.27273	pos	PC(18:1(9Z)/4:0)	LMGP01010916	Lipids and lipid-like molecules	Glycerophospholipids	Glycerophosphocholines	M+Na	C30H58NO8P	35.8	7.37	10.5819	1.05244	0.0374568	0.0820909	-2.18695	0.219615	39.9686	181.994	49.856	35.8822	14.2839	40.6458	26.3111	72.8327	94.5842	245.266	389.985	59.7165	276.624	25.7882
3.13_543.3353n	526.332	3.12623	pos	PC(20:4(5Z,8Z,11Z,14Z)/0:0)	LMGP01050048	Lipids and lipid-like molecules	Glycerophospholipids	Glycerophosphocholines	M+H-H2O, M+NH4	C28H50NO7P	36.4	5.05	5.25723	1.34906	0.036903	0.0812021	-1.72592	0.302305	102.334	338.511	143.167	111.256	60.8885	93.0943	84.1812	121.415	175.798	439.625	699.126	133.592	480.602	102.325
6.45_833.5735n	878.559	6.45382	neg	PC(18:1(11Z)/22:5(7Z,10Z,13Z,16Z,19Z))	LMGP01010846	Lipids and lipid-like molecules	Glycerophospholipids	Glycerophosphocholines	M-H2O-H, M+FA-H	C48H84NO8P	41.4	49.1	-23.9039	1.16462	2.81457e-05	0.00841241	-1.69368	0.309138	51.6203	166.981	46.9663	55.5532	30.9564	44.5029	75.9979	55.7451	179.306	159.397	192.517	215.73	135.984	118.953
7.04_614.3451m/z	614.345	7.04478	neg	PC(22:5(7Z,10Z,13Z,16Z,19Z)/0:0)	LMGP01050143	Lipids and lipid-like molecules	Glycerophospholipids	Glycerophosphocholines	M+FA-H	C30H52NO7P	47.2	47.5	-2.25088	1.61151	0.0014992	0.0136773	-1.31762	0.401195	159.421	397.365	113.791	167.255	204.638	149.445	236.951	84.4441	487.139	373.861	479.227	526.735	304.935	212.291
7.17_590.3452m/z	590.345	7.17328	neg	PC(20:3(8Z,11Z,14Z)/0:0)	LMGP01050133	Lipids and lipid-like molecules	Glycerophospholipids	Glycerophosphocholines	M+FA-H	C28H52NO7P	48.7	53.3	-2.09807	1.03871	9.43922e-05	0.00870894	-1.16798	0.445045	76.5987	172.115	62.8155	90.0644	88.3862	61.9563	84.0497	72.3202	136.369	212.107	168.18	215.917	135.706	164.409
8.52_582.3763m/z	582.376	8.52388	neg	PC(19:0/0:0)	LMGP01050041	Lipids and lipid-like molecules	Glycerophospholipids	Glycerophosphocholines	M+FA-H	C27H56NO7P	50.7	62.4	-2.40554	1.97308	0.0120766	0.0387296	-1.12222	0.459387	361.397	786.695	239.227	498.372	333.896	417.205	268.526	411.157	1311.28	1073.36	616.478	597.799	500.564	620.692
2.53_474.2911m/z	474.291	2.5261	pos	PC(P-14:0/0:0)	LMGP01070002	Lipids and lipid-like molecules	Glycerophospholipids	Glycerophosphocholines	M+Na	C22H46NO6P	35.7	8.15	-9.62921	1.33219	0.0141206	0.0425069	-0.882301	0.542501	262.447	483.772	486.72	273.451	180.935	160.088	144.555	328.932	451.583	520.19	655.22	301.489	576.742	397.406
7.29_616.3610m/z	616.361	7.2876	neg	PC(22:4(7Z,10Z,13Z,16Z)/0:0)	LMGP01050124	Lipids and lipid-like molecules	Glycerophospholipids	Glycerophosphocholines	M+FA-H	C30H54NO7P	50.7	60.9	-1.73246	1.46016	0.00140292	0.0134782	-0.710855	0.610958	306.714	502.022	273.309	267.098	318.33	350.2	357.628	273.722	639.888	560.993	555.53	470.459	418.145	367.116
5.63_560.3131m/z	560.313	5.63412	pos	PC(18:1(9E)/0:0)	LMGP01050030	Lipids and lipid-like molecules	Glycerophospholipids	Glycerophosphocholines	M+K	C26H52NO7P	37.9	14	3.42881	1.04501	0.000409589	0.0106076	-0.709961	0.611336	148.096	242.25	159.464	121.377	141.351	178.925	121.06	166.4	232.779	270.973	263.355	259.801	255.951	170.639
6.41_612.3296m/z	612.33	6.40965	neg	PC(22:6(4Z,7Z,10Z,13Z,16Z,19Z)/0:0)	LMGP01050056	Lipids and lipid-like molecules	Glycerophospholipids	Glycerophosphocholines	M+FA-H	C30H50NO7P	53.5	71	-1.95813	3.76995	0.00045425	0.0106076	-0.679646	0.624319	2069.32	3314.52	1828.95	2195.11	2309.18	2167.35	2161.55	1753.76	4054.27	3885.21	3148.26	3187.14	3024.78	2587.45
3.74_826.5363m/z	826.536	3.73705	pos	PC(22:6(4Z,7Z,10Z,13Z,16Z,19Z)/18:4(6Z,9Z,12Z,15Z))	LMGP01012112	Lipids and lipid-like molecules	Glycerophospholipids	Glycerophosphocholines	M+H	C48H76NO8P	46.2	44.5	-2.25773	1.38434	0.00972791	0.0339497	-0.606825	0.65664	412.584	628.327	454.69	347.772	352.854	395.993	451.451	472.747	500.565	661.505	896.722	548.686	687.121	475.362
6.19_562.3137m/z	562.314	6.19065	neg	PC(18:3(9Z,12Z,15Z)/0:0)	LMGP01050038	Lipids and lipid-like molecules	Glycerophospholipids	Glycerophosphocholines	M+FA-H	C26H48NO7P	50.3	55.3	-2.63944	2.48573	0.00561984	0.0252101	-0.575674	0.670973	1326.58	1977.09	1289.74	1298.85	1987.37	1134.38	1111.74	1137.37	1947.79	1991.38	1924.14	1493.17	2455.15	2050.92
6.45_588.3294m/z	588.329	6.45382	neg	PC(20:4(8Z,11Z,14Z,17Z)/0:0)	LMGP01050140	Lipids and lipid-like molecules	Glycerophospholipids	Glycerophosphocholines	M+FA-H	C28H50NO7P	52.3	65.6	-2.4278	4.80275	3.03541e-06	0.00299004	-0.517328	0.698665	4449.23	6368.19	4080.65	4990.33	4854.62	4423.09	4592.88	3753.81	6686.97	6347.92	6182.33	6239.49	6271.03	6481.4
3.11_515.3060n	533.339	3.11173	pos	PC(18:4(9E,11E,13E,15E)/0:0)	LMGP01050040	Lipids and lipid-like molecules	Glycerophospholipids	Glycerophosphocholines	M+H, M+NH4	C26H46NO7P	36.4	2.61	9.34563	1.66597	0.0120321	0.0386174	-0.447327	0.733401	864.544	1178.82	975.59	820.651	705.888	913.511	854.301	917.322	1010.99	1432.61	1343.59	965.02	1389.99	930.695
5.63_604.3368m/z	604.337	5.63412	pos	PC(10:0/10:0)	LMGP01010380	Lipids and lipid-like molecules	Glycerophospholipids	Glycerophosphocholines	M+K	C28H56NO8P	34.6	0.519	-1.21876	1.04698	0.00117478	0.0126878	-0.439673	0.737302	299.205	405.81	338.336	297.368	217.85	321.503	271.206	348.965	380.205	396.585	433.494	426.682	437.822	360.074
7.15_694.3852m/z	694.385	7.15088	pos	PE(18:4(6Z,9Z,12Z,15Z)/12:0)	LMGP02010738	Lipids and lipid-like molecules	Glycerophospholipids	Glycerophosphoethanolamines	M+K	C35H62NO8P	37.4	6	1.11322	1.19799	0.016133	0.0459872	-2.38424	0.191545	39.6789	207.152	61.214	40.8004	4.1324	49.7498	11.5396	70.6371	154.195	152.21	476.431	140.252	230.459	89.3619
6.61_760.4237m/z	760.424	6.61373	pos	PE(20:5(5Z,8Z,11Z,14Z,17Z)/15:1(9Z))	LMGP02010967	Lipids and lipid-like molecules	Glycerophospholipids	Glycerophosphoethanolamines	M+K	C40H68NO8P	36.5	3.77	-10.693	2.08333	0.00658868	0.027543	-2.17957	0.220741	127.818	579.04	145.746	90.7869	16.2301	217.92	78.2902	217.934	488.688	414.487	1136.54	543.475	677.432	213.62
3.24_592.3714m/z	592.371	3.2434	pos	1-(2-methoxy-docosanyl)-sn-glycero-3-phosphoethanolamine	LMGP02060025	Lipids and lipid-like molecules	Glycerophospholipids	Glycerophosphoethanolamines	M+K	C28H60NO7P	46.3	51.7	-4.49597	1.20113	0.0392109	0.0847814	-1.84967	0.277457	72.2639	260.451	100.9	77.8271	42.923	60.9449	43.5325	107.456	125.896	325.259	539.125	99.8385	406.823	65.7663
3.16_738.4469m/z	738.447	3.15557	pos	PE(15:0/18:3(6Z,9Z,12Z))	LMGP02010459	Lipids and lipid-like molecules	Glycerophospholipids	Glycerophosphoethanolamines	M+K	C38H70NO8P	45.9	41.6	-0.294869	1.22117	0.0125189	0.0395744	-1.6805	0.311975	75.7254	242.729	107.474	65.7334	41.7398	86.6724	69.503	83.2302	130.923	273.339	434.763	172.184	349.299	95.8664
6.29_772.4380m/z	772.438	6.28658	pos	PE(22:6(4Z,7Z,10Z,13Z,16Z,19Z)/14:1(9Z))	LMGP02011135	Lipids and lipid-like molecules	Glycerophospholipids	Glycerophosphoethanolamines	M+K	C41H68NO8P	34.9	0.616	8.95848	1.25827	0.000395316	0.010602	-1.35665	0.390487	93.2832	238.889	112.978	95.8212	48.7567	108.669	66.333	127.141	210.224	228.833	341.792	209.626	276.039	166.822
6.48_684.3877m/z	684.388	6.48342	pos	PE(12:0/17:2(9Z,12Z))	LMGP02010365	Lipids and lipid-like molecules	Glycerophospholipids	Glycerophosphoethanolamines	M+K	C34H64NO8P	34	0	-19.2445	1.2323	0.00327011	0.0192979	-1.33805	0.395556	96.2072	243.22	77.7066	73.4887	98.3237	137.568	49.963	140.193	194.709	246.33	391.999	225.659	266.862	133.763
7.06_814.5600m/z	814.56	7.05895	neg	PE(20:3(8Z,11Z,14Z)/18:0)	LMGP02010913	Lipids and lipid-like molecules	Glycerophospholipids	Glycerophosphoethanolamines	M+FA-H	C43H80NO8P	43.6	25.8	-0.443537	2.76793	0.00463128	0.0229146	-1.09792	0.467188	683.792	1463.63	393.335	570.38	801.079	444.598	732.856	1160.5	1521.25	1666.1	2060.44	1653.8	983.346	896.838
6.39_760.4190m/z	760.419	6.39308	pos	PE(17:2(9Z,12Z)/18:4(6Z,9Z,12Z,15Z))	LMGP02010606	Lipids and lipid-like molecules	Glycerophospholipids	Glycerophosphoethanolamines	M+K	C40H68NO8P	30.8	0.18	-17.1793	1.99792	0.00362842	0.0202762	-0.971336	0.510033	419.105	821.721	477.715	428.823	238.4	562.214	270.536	536.941	787.577	670.814	1242.99	826.479	796.26	606.202
7.07_840.5755m/z	840.576	7.07312	neg	PE(20:3(8Z,11Z,14Z)/20:1(11Z))	LMGP02010922	Lipids and lipid-like molecules	Glycerophospholipids	Glycerophosphoethanolamines	M+FA-H	C45H82NO8P	41.3	18.7	-0.62569	1.57695	0.0152247	0.0443547	-0.830675	0.562266	350.579	623.51	166.565	272.264	482.222	246.173	400.026	536.223	586.663	734.02	826.151	753.476	454.965	385.786
6.15_772.4357m/z	772.436	6.14543	pos	PE(18:3(6Z,9Z,12Z)/18:4(6Z,9Z,12Z,15Z))	LMGP02010695	Lipids and lipid-like molecules	Glycerophospholipids	Glycerophosphoethanolamines	M+K	C41H68NO8P	32.3	1.9	5.80015	1.21899	0.00207824	0.0156509	-0.694005	0.618135	238.778	386.288	277.726	251.108	118.666	318.118	193.502	273.549	369.345	347.326	479.153	388.364	395.213	338.326
3.69_782.5107m/z	782.511	3.69255	pos	PE(14:0/22:2(13Z,16Z))	LMGP02010420	Lipids and lipid-like molecules	Glycerophospholipids	Glycerophosphoethanolamines	M+K	C41H78NO8P	45.8	35.2	1.4529	1.67606	0.016525	0.0466771	-0.510117	0.702166	787.281	1121.22	844.989	698.13	600.507	812.821	800.392	966.846	984.563	1201.96	1566.62	940.859	1170.79	862.51
7.32_554.3452m/z	554.345	7.3161	neg	PE(20:0/0:0)	LMGP02050012	Lipids and lipid-like molecules	Glycerophospholipids	Glycerophosphoethanolamines	M+FA-H	C25H52NO7P	51.8	63.7	-2.16546	1.59241	0.0014071	0.0134782	-0.42872	0.742921	699.667	941.779	680.244	771.191	726.25	672.047	703	645.273	1118.39	1065.2	954.064	879.04	798.942	835.041
5.99_760.4233m/z	760.423	5.9876	pos	PE(22:6(4Z,7Z,10Z,13Z,16Z,19Z)/13:0)	LMGP02011133	Lipids and lipid-like molecules	Glycerophospholipids	Glycerophosphoethanolamines	M+K	C40H68NO8P	33	7.62	-11.2697	1.1669	0.010629	0.0358783	-0.263903	0.832832	762.958	916.101	866.916	756.325	573.872	856.829	701.732	822.073	918.16	884.613	940.702	983.518	905.99	863.624
7.31_753.4086m/z	753.409	7.3092	pos	PG(18:3(6Z,9Z,12Z)/14:1(9Z))	LMGP04010369	Lipids and lipid-like molecules	Glycerophospholipids	Glycerophosphoglycerols	M+K	C38H67O10P	37.2	2.98	-2.41827	2.46637	0.0128607	0.0402254	-2.57116	0.168269	138.846	825.143	156.573	138.972	45.9439	192.847	40.3387	258.4	642.407	589.54	1883.5	580.897	914.324	340.189
6.60_863.4752m/z	863.475	6.5994	pos	PG(22:6(4Z,7Z,10Z,13Z,16Z,19Z)/20:5(5Z,8Z,11Z,14Z,17Z))	LMGP04010840	Lipids and lipid-like molecules	Glycerophospholipids	Glycerophosphoglycerols	M+Na	C48H73O10P	35.5	0	-9.71508	1.08944	0.00245469	0.0167486	-2.23666	0.212177	30.7575	144.961	26.2142	13.3738	1.28368e-06	54.8693	1.04463	89.0431	177.101	107.094	205.994	113.816	205.949	59.8144
7.12_753.4186m/z	753.419	7.12188	pos	PG(18:3(9Z,12Z,15Z)/14:1(9Z))	LMGP04010400	Lipids and lipid-like molecules	Glycerophospholipids	Glycerophosphoglycerols	M+K	C38H67O10P	34.3	3.15	11.5156	1.06353	0.010194	0.0348568	-1.96666	0.255845	42.9849	168.011	40.9444	37.2056	2.17211	67.1612	2.51247	107.914	152.769	116.907	339.677	134.527	169.954	94.2326
6.44_743.4218m/z	743.422	6.43975	pos	PG(13:0/18:2(9Z,12Z))	LMGP04010078	Lipids and lipid-like molecules	Glycerophospholipids	Glycerophosphoglycerols	M+K	C37H69O10P	34.5	0	-5.94347	1.10378	0.0004527	0.0106076	-1.84051	0.279223	43.122	154.436	51.6863	49.2815	11.1606	49.9813	22.6293	73.9931	126.571	144.854	209.34	145.888	211.823	88.1397
6.85_753.4137m/z	753.414	6.84907	pos	PG(12:0/20:4(5Z,8Z,11Z,14Z))	LMGP04010062	Lipids and lipid-like molecules	Glycerophospholipids	Glycerophosphoglycerols	M+K	C38H67O10P	39.7	12.4	4.76793	1.48724	0.00215993	0.0158459	-1.42634	0.372073	127.508	342.696	150.61	126.164	54.9587	173.241	29.148	230.927	353.734	293.014	521.85	309.809	369.509	208.262
6.30_743.4220m/z	743.422	6.30225	pos	PG(14:0/17:2(9Z,12Z))	LMGP04010098	Lipids and lipid-like molecules	Glycerophospholipids	Glycerophosphoglycerols	M+K	C37H69O10P	34.9	0	-5.60327	1.54981	0.00109103	0.0124391	-1.35253	0.391604	144.608	369.271	139.436	129.996	84.0019	200.39	87.1626	226.662	326.91	343.55	546.338	337.233	428.079	233.515
6.45_841.4611m/z	841.461	6.45442	pos	1-(8-[5]-ladderane-octanoyl)-2-(8-[3]-ladderane-octanyl)-sn-glycero-3-phospho-(1'-sn-glycerol)	LMGP04040006	Lipids and lipid-like molecules	Glycerophospholipids	Glycerophosphoglycerols	M+K	C46H75O9P	33.7	4.59	-21.0875	1.76553	0.00106382	0.0123745	-1.04838	0.483511	274.35	567.413	275.981	235.205	137.112	363.289	169.943	464.573	572.137	476.977	716.604	604.642	595.677	438.442
6.69_753.4099m/z	753.41	6.68557	pos	PG(20:4(5Z,8Z,11Z,14Z)/12:0)	LMGP04010620	Lipids and lipid-like molecules	Glycerophospholipids	Glycerophosphoglycerols	M+K	C38H67O10P	38.7	5.68	-0.628244	1.22692	0.00265583	0.0173927	-1.03471	0.488115	142.337	291.605	173.28	129.275	64.1154	175.234	84.3894	227.728	330.455	256.534	401.153	289.099	272.301	200.087
6.32_767.4170m/z	767.417	6.31792	pos	PG(18:3(6Z,9Z,12Z)/15:1(9Z))	LMGP04010371	Lipids and lipid-like molecules	Glycerophospholipids	Glycerophosphoglycerols	M+K	C39H69O10P	30.8	0	-12.3086	1.44872	0.00165739	0.0142893	-1.01808	0.493772	203.794	412.729	284.512	189.804	94.2211	261.488	117.441	275.298	474.323	291.395	543.464	389.349	398.64	379.205
6.51_753.4095m/z	753.41	6.51242	pos	PG(14:1(9Z)/18:3(9Z,12Z,15Z))	LMGP04010123	Lipids and lipid-like molecules	Glycerophospholipids	Glycerophosphoglycerols	M+K	C38H67O10P	38.2	1.84	-1.11575	1.55148	0.00295923	0.0183076	-0.883195	0.542165	288.315	531.785	296.174	285.272	113.606	363.596	213.604	457.639	577.208	416.407	674.786	571.198	512.161	438.948
6.16_743.4199m/z	743.42	6.16127	pos	PG(15:1(9Z)/16:1(9Z))	LMGP04010168	Lipids and lipid-like molecules	Glycerophospholipids	Glycerophosphoglycerols	M+K	C37H69O10P	38.2	11.9	-8.63639	1.51256	0.000610978	0.0109209	-0.837094	0.55977	275.177	491.59	308.89	301.552	152.755	345.687	213.203	328.977	459.375	439.697	631.426	453.221	531.748	434.073
6.33_753.4141m/z	753.414	6.33258	pos	PG(18:4(6Z,9Z,12Z,15Z)/14:0)	LMGP04010427	Lipids and lipid-like molecules	Glycerophospholipids	Glycerophosphoglycerols	M+K	C38H67O10P	34.9	4.3	5.27263	2.09619	0.00289751	0.0181276	-0.556693	0.679859	950.758	1398.46	1125.53	925.673	591.441	1148.94	736.145	1176.82	1399.77	1241.12	1630.61	1455.93	1381.98	1281.36
3.62_676.4238n	694.457	3.61955	pos	PG(14:1(9Z)/15:1(9Z))	LMGP04010113	Lipids and lipid-like molecules	Glycerophospholipids	Glycerophosphoglycerols	M+H, M+NH4	C35H65O10P	42.4	28.3	-11.4321	2.48899	0.0106828	0.0359977	-0.379623	0.768638	2367.72	3080.41	2605.7	2119.52	2166.71	2260.04	2449.62	2604.72	2716.6	3136.83	4053.26	2887.2	3057.59	2630.96
6.03_767.4221m/z	767.422	6.03477	pos	PG(18:4(6Z,9Z,12Z,15Z)/15:0)	LMGP04010429	Lipids and lipid-like molecules	Glycerophospholipids	Glycerophosphoglycerols	M+K	C39H69O10P	31.3	3.02	-5.31128	1.17444	0.0117871	0.0382319	-0.335691	0.792404	597.622	754.189	691.43	625.58	408.391	695.305	516.35	648.679	822.322	693.448	767.009	805.624	722.762	713.967
3.08_990.6063m/z	990.606	3.08275	pos	PIM1(16:0/16:0)	LMGP15010003	Lipids and lipid-like molecules	Glycerophospholipids	Glycerophosphoinositolglycans	M+NH4	C47H89O18P	35.9	0	-6.31745	1.07466	0.0289719	0.0682123	-2.25594	0.209361	38.0864	181.918	67.927	38.5983	12.7661	42.2011	24.6492	42.377	94.5917	222.794	384.153	62.2214	283.633	44.1132
7.54_885.4872m/z	885.487	7.54222	pos	PI(15:1(9Z)/20:2(11Z,14Z))	LMGP06010150	Lipids and lipid-like molecules	Glycerophospholipids	Glycerophosphoinositols	M+K	C44H79O13P	35.3	0.86	-2.13907	1.16577	0.0121051	0.0387296	-3.36504	0.0970556	16.257	167.502	21.9917	5.69682	5.25623	28.7846	1.1683	34.6443	124.951	140.77	394.248	104.14	191.378	49.5252
7.21_863.4716m/z	863.472	7.20922	pos	PI(17:2(9Z,12Z)/18:4(6Z,9Z,12Z,15Z))	LMGP06010261	Lipids and lipid-like molecules	Glycerophospholipids	Glycerophosphoinositols	M+Na	C44H73O13P	34.3	0	4.10558	1.28968	0.0255804	0.0626105	-3.27194	0.103526	23.5996	227.96	12.1933	14.5646	1.28368e-06	22.2977	1.28368e-06	92.5422	211.019	125.297	595.139	138.533	220.42	77.3493
7.57_863.4732m/z	863.473	7.57103	pos	PI(20:5(5Z,8Z,11Z,14Z,17Z)/15:1(9Z))	LMGP06010622	Lipids and lipid-like molecules	Glycerophospholipids	Glycerophosphoinositols	M+Na	C44H73O13P	35.7	0	6.01737	1.31267	0.0174511	0.0484346	-3.19134	0.109474	24.5806	224.533	36.6835	13.5321	1.28368e-06	33.6745	5.65642	57.9372	173.15	158.035	548.796	150.59	257.053	59.576
7.29_775.4212m/z	775.421	7.29487	pos	PI(13:0/15:1(9Z))	LMGP06010039	Lipids and lipid-like molecules	Glycerophospholipids	Glycerophosphoinositols	M+Na	C37H69O13P	32.8	0	-20.7563	2.21783	0.020184	0.0532857	-2.86643	0.137125	92.5617	675.015	81.6481	88.497	57.6468	126.566	19.8782	181.134	478.679	464.247	1677.1	453.066	729.289	247.71
7.66_775.4209m/z	775.421	7.65852	pos	PI(15:1(9Z)/13:0)	LMGP06010130	Lipids and lipid-like molecules	Glycerophospholipids	Glycerophosphoinositols	M+Na	C37H69O13P	32.5	0	-21.1382	2.52214	0.0168591	0.0473375	-2.7459	0.149074	129.271	867.164	151.354	118.367	27.6135	185.088	37.4831	255.724	672.97	603.027	2072.5	588.876	953.905	311.707
7.38_863.4727m/z	863.473	7.3822	pos	PI(15:1(9Z)/20:5(5Z,8Z,11Z,14Z,17Z))	LMGP06010153	Lipids and lipid-like molecules	Glycerophospholipids	Glycerophosphoinositols	M+Na	C44H73O13P	35	0	5.43038	1.87058	0.013673	0.0417293	-2.71533	0.152266	71.03	466.485	87.4401	54.3179	11.4717	112.649	16.1631	144.139	368.748	331.176	1075.01	322.063	533.138	168.777
7.92_555.2909m/z	555.291	7.92085	pos	1-hexadecanoyl-sn--glycero-3-phospho-D-myo-inositol	LMGP02060006	Lipids and lipid-like molecules	Glycerophospholipids	Glycerophosphoinositols	M+H-H2O	C25H49O12P	41	15.9	-3.49615	1.30042	0.00720763	0.0288899	-2.18555	0.219828	53.6881	244.227	100.267	32.6209	31.7902	35.8931	1.28368e-06	121.558	238.176	132.157	500.254	175.716	200.438	218.624
6.53_951.5261m/z	951.526	6.52708	pos	PI(22:1(11Z)/18:4(6Z,9Z,12Z,15Z))	LMGP06010710	Lipids and lipid-like molecules	Glycerophospholipids	Glycerophosphoinositols	M+K	C49H85O13P	33.9	0	-10.8065	1.02498	0.00156742	0.0139347	-2.04978	0.241521	31.469	130.295	20.6684	24.4057	1.28368e-06	53.6238	17.4638	72.6525	100.899	119.544	192.765	138.055	174.116	56.3928
6.51_973.5386m/z	973.539	6.51242	pos	PI(22:6(4Z,7Z,10Z,13Z,16Z,19Z)/20:2(11Z,14Z))	LMGP06010806	Lipids and lipid-like molecules	Glycerophospholipids	Glycerophosphoinositols	M+K	C51H83O13P	30.5	28.4	19.6099	1.50445	0.000380049	0.0105866	-1.66983	0.31429	94.8111	301.668	109.02	88.9386	7.47869	116.694	72.6451	174.09	328.909	247.473	427.629	298.622	314.987	192.389
6.70_907.4994m/z	907.499	6.70007	pos	PI(P-18:0/20:5(5Z,8Z,11Z,14Z,17Z))	LMGP06030051	Lipids and lipid-like molecules	Glycerophospholipids	Glycerophosphoinositols	M+K	C47H81O12P	34.1	0	-11.9225	1.04431	0.000812291	0.0114062	-1.33825	0.395499	65.1698	164.779	56.8564	58.0949	39.0623	89.8169	43.3806	103.808	143.406	149.456	227.212	169.645	198.895	100.058
6.38_973.5384m/z	973.538	6.37758	pos	PI(20:2(11Z,14Z)/22:6(4Z,7Z,10Z,13Z,16Z,19Z))	LMGP06010556	Lipids and lipid-like molecules	Glycerophospholipids	Glycerophosphoinositols	M+K	C51H83O13P	31.9	0.182	19.3605	1.52247	0.000438686	0.0106076	-1.29382	0.407871	144.599	354.521	146.678	129.931	64.0495	199.567	91.4763	235.89	320.257	311.779	472.974	380.4	388.733	252.981
6.22_973.5384m/z	973.538	6.22408	pos	PI(20:4(5Z,8Z,11Z,14Z)/22:4(7Z,10Z,13Z,16Z))	LMGP06010615	Lipids and lipid-like molecules	Glycerophospholipids	Glycerophosphoinositols	M+K	C51H83O13P	31.7	0.115	19.3902	1.56639	0.0006978	0.0111088	-1.23944	0.423538	167.502	395.481	173.019	164.362	84.5521	205.862	119.153	258.062	359.594	361.307	556.135	376.981	451.25	267.62
6.22_951.5248m/z	951.525	6.22408	pos	PI(22:2(13Z,16Z)/18:3(6Z,9Z,12Z))	LMGP06010739	Lipids and lipid-like molecules	Glycerophospholipids	Glycerophosphoinositols	M+K	C49H85O13P	33.5	0.037	-12.1893	1.61634	0.000241384	0.00989459	-1.18884	0.438656	182.764	416.646	187.384	179.865	94.7672	232.679	123.32	278.571	387.934	388.267	539.214	406.896	465.739	311.828
6.39_951.5251m/z	951.525	6.39308	pos	PI(22:2(13Z,16Z)/18:3(9Z,12Z,15Z))	LMGP06010740	Lipids and lipid-like molecules	Glycerophospholipids	Glycerophosphoinositols	M+K	C49H85O13P	33.5	0	-11.9027	1.50593	0.000364706	0.0105414	-1.18118	0.440991	162.827	369.23	165.132	164.715	88.727	191.318	116.132	250.937	357.428	324.358	495.92	361.205	407.652	268.817
6.74_863.4730m/z	863.473	6.7444	pos	PI(22:6(4Z,7Z,10Z,13Z,16Z,19Z)/13:0)	LMGP06010787	Lipids and lipid-like molecules	Glycerophospholipids	Glycerophosphoinositols	M+Na	C44H73O13P	35.5	0	5.86808	1.06561	0.000721004	0.0112079	-1.14813	0.451211	86.2543	191.162	88.7928	75.4066	30.1834	119.556	59.5801	144.007	198.234	169.521	233.422	189.642	218.344	137.81
6.66_775.4219m/z	775.422	6.65673	pos	PI(16:1(9Z)/12:0)	LMGP06010169	Lipids and lipid-like molecules	Glycerophospholipids	Glycerophosphoinositols	M+Na	C37H69O13P	33.7	0	-19.8649	1.16398	0.00167713	0.0143309	-1.13202	0.456276	111.441	244.24	111.354	146.118	25.2568	159.412	61.7754	164.728	255.872	224.653	333.237	206.49	255.667	189.52
6.44_863.4733m/z	863.473	6.43975	pos	PI(13:0/22:6(4Z,7Z,10Z,13Z,16Z,19Z))	LMGP06010060	Lipids and lipid-like molecules	Glycerophospholipids	Glycerophosphoinositols	M+Na	C44H73O13P	35.9	0.148	6.14572	1.71799	0.000593068	0.0108512	-1.12773	0.457635	230.225	503.076	238.118	198.764	111.455	304.814	159.342	368.859	479.804	446.581	675.269	511.606	516.838	388.362
6.24_929.5122m/z	929.512	6.23958	pos	PI(20:5(5Z,8Z,11Z,14Z,17Z)/20:3(8Z,11Z,14Z))	LMGP06010638	Lipids and lipid-like molecules	Glycerophospholipids	Glycerophosphoinositols	M+Na	C49H79O13P	35.5	0	-3.14629	1.63685	0.000748026	0.0112752	-1.11545	0.461546	214.16	464.006	212.989	220.775	109.777	264.15	153.651	323.621	432.639	414.742	633.761	452.408	519.003	331.485
6.41_907.4993m/z	907.499	6.40858	pos	PI(O-16:0/22:6(4Z,7Z,10Z,13Z,16Z,19Z))	LMGP06020089	Lipids and lipid-like molecules	Glycerophospholipids	Glycerophosphoinositols	M+K	C47H81O12P	34.4	1.51	-11.996	1.49689	0.00124256	0.0129706	-1.06218	0.478909	194.2	405.506	180.432	208.533	94.3255	251.872	127.88	302.16	409.156	364.062	548.2	417.435	413.989	280.192
13.80_857.5186m/z	857.519	13.8011	neg	PI(16:0/20:4(5Z,8Z,11Z,14Z))	LMGP06010958	Lipids and lipid-like molecules	Glycerophospholipids	Glycerophosphoinositols	M-H	C45H79O13P	37.4	3.92	0.0869104	2.01762	0.00254638	0.0170061	-0.946199	0.518998	437.969	843.874	414.732	411.065	669.41	359.153	420.796	352.658	654.093	796.113	1238.06	941.956	663.458	769.565
6.30_819.4465m/z	819.447	6.30225	pos	PI(14:1(9Z)/16:0)	LMGP06010082	Lipids and lipid-like molecules	Glycerophospholipids	Glycerophosphoinositols	M+K	C39H73O13P	34.4	0.456	5.77805	1.76928	0.00148842	0.0136763	-0.908969	0.532566	345.106	648.006	387.337	370.62	156.826	440.058	225.423	490.37	686.613	558.164	837.127	649.143	647.249	509.74
6.50_775.4212m/z	775.421	6.49792	pos	PI(12:0/16:1(9Z))	LMGP06010017	Lipids and lipid-like molecules	Glycerophospholipids	Glycerophosphoinositols	M+Na	C37H69O13P	33.7	0	-20.7977	1.51867	0.00585638	0.0258228	-0.869343	0.547396	293.587	536.334	303.839	313.937	139.686	344.922	182.763	476.374	574.523	450.107	738.525	568.693	491.41	394.743
13.80_833.5200m/z	833.52	13.8011	neg	PI(16:0/18:2(9Z,12Z))	LMGP06010959	Lipids and lipid-like molecules	Glycerophospholipids	Glycerophosphoinositols	M-H	C43H79O13P	38	25.2	1.6901	1.04276	0.00329226	0.0193535	-0.833381	0.561212	144.507	257.49	152.174	109.685	244.074	88.7325	146.564	125.81	236.536	242.659	352.821	224.403	234.303	254.219
6.65_595.2875m/z	595.288	6.6538	neg	PI(18:2(9Z,12Z)/0:0)	LMGP06050010	Lipids and lipid-like molecules	Glycerophospholipids	Glycerophosphoinositols	M-H	C27H49O12P	41.1	14.8	-2.26562	1.36323	0.0151108	0.0442243	-0.75699	0.591729	303.502	512.906	315.062	265.25	565.908	183.387	259.695	231.71	576.687	656.901	549.248	344.755	521.192	428.657
6.27_863.4733m/z	863.473	6.27092	pos	PI(18:4(6Z,9Z,12Z,15Z)/17:2(9Z,12Z))	LMGP06010403	Lipids and lipid-like molecules	Glycerophospholipids	Glycerophosphoinositols	M+Na	C44H73O13P	34.4	0.117	6.2188	1.64384	0.00146631	0.0136195	-0.748774	0.595109	381.319	640.754	392.797	376.084	239.049	464.866	278.155	536.961	616.975	575.939	791.533	649.844	691.229	519.007
2.66_723.4015m/z	723.402	2.66317	neg	PI(12:0/14:1(9Z))	LMGP06010014	Lipids and lipid-like molecules	Glycerophospholipids	Glycerophosphoinositols	M-H	C35H65O13P	38.8	8.84	-10.3021	3.75821	0.0158611	0.045544	-0.698875	0.616052	2629.07	4267.61	2694.97	2378.71	1849.85	2635.86	2990.4	3224.64	3662.16	4150.77	6386.64	3668.07	5068.32	2669.71
6.13_787.4428m/z	787.443	6.1296	pos	PI(12:0/17:2(9Z,12Z))	LMGP06010020	Lipids and lipid-like molecules	Glycerophospholipids	Glycerophosphoinositols	M+Na	C38H69O13P	35.1	0	7.88469	1.03396	0.00180635	0.0146576	-0.695242	0.617606	176.662	286.043	226.578	193.834	77.412	221.932	139.68	200.536	285.063	261.377	335.846	264.341	291.323	278.309
2.61_679.3748m/z	679.375	2.60633	neg	PI(12:0/12:0)	LMGP06010962	Lipids and lipid-like molecules	Glycerophospholipids	Glycerophosphoinositols	M-H2O-H	C33H63O13P	38.9	10.9	-11.42	4.06377	0.014265	0.042745	-0.674583	0.626513	3183.54	5081.37	3489.74	2734.29	2313.78	3134.74	3523.68	3905.03	4453.02	4809.93	7322.53	4376.39	6253.65	3272.69
13.80_953.5369m/z	953.537	13.8011	neg	PI(18:1(9Z)/22:6(4Z,7Z,10Z,13Z,16Z,19Z))	LMGP06010013	Lipids and lipid-like molecules	Glycerophospholipids	Glycerophosphoinositols	M+FA-H	C49H81O13P	38.5	8.6	-3.11033	1.06891	0.00308076	0.0186858	-0.583066	0.667543	225.856	338.339	202.521	235.847	276.385	245.752	212.752	181.877	328.324	414.288	417.135	291.079	273.64	305.565
6.59_804.4512m/z	804.451	6.58507	pos	PS(P-16:0/20:5(5Z,8Z,11Z,14Z,17Z))	LMGP03030022	Lipids and lipid-like molecules	Glycerophospholipids	Glycerophosphoserines	M+K	C42H72NO9P	37	5.04	-8.39227	1.55353	0.00796887	0.0303715	-2.4282	0.185797	59.4683	320.072	75.6129	69.6987	13.2917	67.4384	17.2164	113.551	258.637	217.127	660.119	239.573	411.109	133.863
6.57_826.4646m/z	826.465	6.57073	pos	PS(18:3(6Z,9Z,12Z)/20:5(5Z,8Z,11Z,14Z,17Z))	LMGP03010390	Lipids and lipid-like molecules	Glycerophospholipids	Glycerophosphoserines	M+Na	C44H70NO10P	37.1	0	2.05767	1.35077	0.00925512	0.0330668	-2.37967	0.192153	46.3229	241.072	51.0692	16.9762	1.28368e-06	74.7061	1.28368e-06	135.186	192.653	188.905	485.284	228.15	282.486	68.9561
2.94_858.5269m/z	858.527	2.93858	pos	PS(18:4(6Z,9Z,12Z,15Z)/22:2(13Z,16Z))	LMGP03010453	Lipids and lipid-like molecules	Glycerophospholipids	Glycerophosphoserines	M+Na	C46H78NO10P	38.4	12.3	1.62824	1.25317	0.0213015	0.0553606	-2.24328	0.211206	51.1591	242.224	108.749	44.4159	40.5129	24.6434	36.2074	52.4258	142.161	300.153	505.234	82.1524	339.977	83.666
6.60_782.4380m/z	782.438	6.5994	pos	PS(15:0/18:3(9Z,12Z,15Z))	LMGP03010147	Lipids and lipid-like molecules	Glycerophospholipids	Glycerophosphoserines	M+K	C39H70NO10P	37.8	4.35	1.46774	1.61493	0.0188494	0.050931	-2.05619	0.240451	92.644	385.293	58.1306	57.1287	20.5764	182.189	44.7043	193.135	300.911	321.796	805.351	336.759	479.734	67.2071
2.70_682.4217m/z	682.422	2.6961	pos	PS(18:4(6Z,9Z,12Z,15Z)/12:0)	LMGP03010425	Lipids and lipid-like molecules	Glycerophospholipids	Glycerophosphoserines	M+H-H2O	C36H62NO10P	37.8	28.4	19.7439	1.24329	0.0486191	0.0990974	-2.01343	0.247683	69.9383	282.37	159.412	79.2988	45.3457	57.4366	37.1704	40.9662	101.27	372.681	646.526	96.3138	390.27	87.1594
6.47_848.4728m/z	848.473	6.46892	pos	PS(16:1(9Z)/22:4(7Z,10Z,13Z,16Z))	LMGP03010225	Lipids and lipid-like molecules	Glycerophospholipids	Glycerophosphoserines	M+K	C44H76NO10P	34.5	2.81	-13.6577	1.81004	0.00337368	0.0195799	-1.86406	0.274702	123.312	448.894	156.893	88.91	28.5258	208.498	52.4683	204.577	396.833	415.259	794.062	379.916	498.34	208.953
6.60_620.3342m/z	620.334	6.5994	pos	PS(22:0/0:0)	LMGP03050025	Lipids and lipid-like molecules	Glycerophospholipids	Glycerophosphoserines	M+K	C28H56NO9P	43	32.3	3.03145	1.10251	0.013601	0.0416394	-1.78242	0.290695	56.2943	193.654	84.3841	28.6599	26.1223	60.3941	19.0396	119.166	184.78	119.926	391.308	186.508	190.145	89.259
5.31_560.3339m/z	560.334	5.31413	pos	PS(22:2(13Z,16Z)/0:0)	LMGP03050024	Lipids and lipid-like molecules	Glycerophospholipids	Glycerophosphoserines	M+H-H2O	C28H52NO9P	53.8	74.3	-1.33234	1.93085	7.14995e-07	0.00253076	-1.74466	0.298404	133.5	447.38	89.9412	124.107	155.217	78.7467	175.35	177.638	461.764	434.949	503.561	467.787	342.216	474.005
6.67_848.4732m/z	848.473	6.67107	pos	PS(22:4(7Z,10Z,13Z,16Z)/16:1(9Z))	LMGP03010794	Lipids and lipid-like molecules	Glycerophospholipids	Glycerophosphoserines	M+K	C44H76NO10P	34.1	2.05	-13.1924	1.62437	0.00132223	0.013262	-1.7354	0.300326	107.754	358.792	126.755	87.3963	33.2957	159.536	73.8578	165.685	334.194	318.075	594.042	321.849	381.905	202.685
2.90_562.3425m/z	562.343	2.89542	pos	PS(22:1(11Z)/0:0)	LMGP03050023	Lipids and lipid-like molecules	Glycerophospholipids	Glycerophosphoserines	M+H-H2O	C28H54NO9P	47.6	65.1	-13.4632	1.51314	0.00418802	0.0217809	-1.5645	0.338096	120.353	355.973	198.571	108.651	78.5539	146.217	80.5927	109.533	229.993	377.423	590.137	277.895	459.557	200.836
6.29_758.4310m/z	758.431	6.28658	pos	PS(12:0/19:1(9Z))	LMGP03010058	Lipids and lipid-like molecules	Glycerophospholipids	Glycerophosphoserines	M+K	C37H70NO10P	33.3	3.58	-8.18276	1.19335	0.000954651	0.0119433	-1.55478	0.34038	68.8342	202.227	69.852	67.614	39.089	97.1808	42.2227	97.0467	171.831	196.355	309.976	162.906	246.203	126.092
6.54_716.3983m/z	716.398	6.54175	pos	PS(14:1(9Z)/14:0)	LMGP03010111	Lipids and lipid-like molecules	Glycerophospholipids	Glycerophosphoserines	M+K	C34H64NO10P	36.6	8.43	12.3727	3.1892	0.00560541	0.0251867	-1.52016	0.348646	565.108	1620.86	615.17	515.019	260.475	734.988	344.629	920.368	1434.57	1315.17	2907.52	1491.63	1727.79	848.497
7.01_842.4249m/z	842.425	7.00805	pos	PS(20:5(5Z,8Z,11Z,14Z,17Z)/18:3(9Z,12Z,15Z))	LMGP03010662	Lipids and lipid-like molecules	Glycerophospholipids	Glycerophosphoserines	M+K	C44H70NO10P	37.8	11.3	-14.9599	1.24704	0.00686466	0.0281558	-1.49916	0.35376	90.1789	254.915	130.972	108.432	10.1556	136.709	64.27	90.5348	301.177	166.316	444.354	264.498	201.936	151.212
6.50_782.4362m/z	782.436	6.49792	pos	PS(18:3(6Z,9Z,12Z)/15:0)	LMGP03010370	Lipids and lipid-like molecules	Glycerophospholipids	Glycerophosphoserines	M+K	C39H70NO10P	38.3	5.72	-0.927947	2.46916	0.00877732	0.0320711	-1.46648	0.361865	371.238	1025.9	363.199	430.334	157.575	471.279	206.54	598.499	887.979	863.175	1879.15	930.461	1109.58	485.053
6.41_716.3973m/z	716.397	6.40858	pos	PS(13:0/15:1(9Z))	LMGP03010071	Lipids and lipid-like molecules	Glycerophospholipids	Glycerophosphoserines	M+K	C34H64NO10P	35.8	8.7	10.8876	2.22075	0.00168394	0.0143327	-1.3815	0.383821	297.48	775.051	336.674	285.504	209.388	334.95	189.919	428.448	730.275	678.241	1266.31	720.216	768.494	486.768
6.85_842.4245m/z	842.425	6.84907	pos	PS(20:5(5Z,8Z,11Z,14Z,17Z)/18:3(6Z,9Z,12Z))	LMGP03010661	Lipids and lipid-like molecules	Glycerophospholipids	Glycerophosphoserines	M+K	C44H70NO10P	37.9	11.4	-15.4005	1.13511	0.0043247	0.0221601	-1.26107	0.417235	90.5091	216.926	97.7116	89.7077	35.157	169.459	38.3979	112.621	268.832	134.738	296.41	263.315	186.082	152.178
6.64_562.3071m/z	562.307	6.6424	pos	PS(19:0/0:0)	LMGP03050028	Lipids and lipid-like molecules	Glycerophospholipids	Glycerophosphoserines	M+Na	C25H50NO9P	40.9	22.6	-8.28068	2.24949	0.00249389	0.0168261	-1.21476	0.430845	380.106	882.235	438.344	359.366	168.332	476.026	338.224	500.344	908.058	668.495	1393.07	885.893	854.215	583.676
4.59_830.4411m/z	830.441	4.588	pos	PS(15:1(9Z)/22:6(4Z,7Z,10Z,13Z,16Z,19Z))	LMGP03010191	Lipids and lipid-like molecules	Glycerophospholipids	Glycerophosphoserines	M+K	C43H70NO10P	36.7	1.73	5.32533	1.44041	0.017405	0.0483548	-0.85845	0.551545	307.249	557.069	327.768	300.338	195.01	373.944	237.195	409.235	696.229	329.006	867.995	523.086	386.748	539.35
6.15_758.4263m/z	758.426	6.14543	pos	PS(17:0/14:1(9Z))	LMGP03010006	Lipids and lipid-like molecules	Glycerophospholipids	Glycerophosphoserines	M+K	C37H70NO10P	33.5	0.27	-14.7239	1.20082	0.000290884	0.0102893	-0.731424	0.602309	200.391	332.705	233.829	195.301	141.826	260.703	154.915	215.773	313.528	314.617	410.284	312.277	323.009	322.515
4.56_742.3889m/z	742.389	4.55667	pos	PS(12:0/18:2(9Z,12Z))	LMGP03010053	Lipids and lipid-like molecules	Glycerophospholipids	Glycerophosphoserines	M+K	C36H66NO10P	31.8	0.0929	-23.7306	1.49376	0.0230036	0.0583892	-0.671108	0.628024	482.45	768.202	524.602	490.456	341.471	541.182	383.675	613.312	936.168	462.282	1090.54	751.938	528.669	839.618
5.96_848.4746m/z	848.475	5.95627	pos	PS(18:4(6Z,9Z,12Z,15Z)/20:1(11Z))	LMGP03010445	Lipids and lipid-like molecules	Glycerophospholipids	Glycerophosphoserines	M+K	C44H76NO10P	34.3	4.65	-11.4042	1.40442	0.000284175	0.0102893	-0.383034	0.766823	585.287	763.262	610.625	594.611	474.967	620.092	580.552	630.873	747.116	785.416	804.508	773.883	810.608	658.039
5.63_848.4747m/z	848.475	5.63412	pos	PS(20:2(11Z,14Z)/18:3(6Z,9Z,12Z))	LMGP03010572	Lipids and lipid-like molecules	Glycerophospholipids	Glycerophosphoserines	M+K	C44H76NO10P	35.7	10.6	-11.3082	1.28721	0.0192682	0.0516346	-0.168874	0.889537	1641.52	1845.37	1716.92	1709.69	1358.64	1698.92	1612.44	1752.52	1795.91	1849.75	1712.65	2020.4	1886.3	1807.19
7.21_650.3599m/z	650.36	7.20922	pos	PA-PS	LMGP20040014	Lipids and lipid-like molecules	Glycerophospholipids	Oxidized glycerophospholipids	M+H-H2O	C31H58NO12P	39.1	14.2	-9.64746	1.23329	0.0156142	0.0450691	-3.48125	0.0895448	17.0879	190.831	16.7866	10.8806	1.28368e-06	17.7758	15.7937	41.2907	160.993	147.095	468.279	133.866	195.935	38.817
4.95_620.3192m/z	620.319	4.94755	neg	OOV-PS	LMGP20040022	Lipids and lipid-like molecules	Glycerophospholipids	Oxidized glycerophospholipids	M-H	C29H52NO11P	47.7	48.6	-2.09852	1.20291	0.000892992	0.0116771	-3.1895	0.109614	16.5893	151.343	7.37373	17.8169	14.172	9.67853	16.5731	33.9216	163.078	93.8665	259.794	202.349	108.002	80.9708
4.34_811.3601m/z	811.36	4.34225	neg	OKODiA-PI	LMGP20050030	Lipids and lipid-like molecules	Glycerophospholipids	Oxidized glycerophospholipids	M+FA-H	C35H59O16P	37.9	7.97	10.1894	1.11718	0.00179586	0.0146212	-3.1484	0.112782	16.9513	150.302	25.4774	8.3055	38.4683	4.51721	14.5868	10.3528	119.131	144.482	166.215	162.494	36.811	272.681
7.61_635.3310m/z	635.331	7.61452	pos	PKODiA-PG	LMGP20060008	Lipids and lipid-like molecules	Glycerophospholipids	Oxidized glycerophospholipids	M+H-H2O	C30H53O13P	33.5	0	18.1829	1.04713	0.0172942	0.0481139	-2.99922	0.125068	18.067	144.458	15.5368	17.5732	1.90716	30.3652	1.28368e-06	43.0196	135.952	99.3211	350.957	96.1777	142.887	41.452
7.57_679.3575m/z	679.358	7.57103	pos	OKODiA-PG	LMGP20060030	Lipids and lipid-like molecules	Glycerophospholipids	Oxidized glycerophospholipids	M+H	C32H55O13P	32.8	0	18.0241	1.27285	0.0146866	0.0434814	-2.98457	0.126344	26.924	213.1	36.6207	17.1507	1.28368e-06	44.792	1.28368e-06	62.9806	162.582	160.514	516.01	146.752	202.693	90.0497
7.54_691.3494n	709.382	7.54222	pos	OKODiA-PS	LMGP20040030	Lipids and lipid-like molecules	Glycerophospholipids	Oxidized glycerophospholipids	M+H, M+NH4	C32H54NO13P	32.6	1.03	23.3457	3.88124	0.00903099	0.0325892	-2.2345	0.212494	443.957	2089.27	409.982	520.785	130.911	542.778	169.261	890.027	1722.7	1848.87	4433.61	1528.04	2094.21	908.174
5.30_604.3244m/z	604.324	5.3032	neg	PHODiA-PE	LMGP20020021	Lipids and lipid-like molecules	Glycerophospholipids	Oxidized glycerophospholipids	M-H2O-H	C29H54NO11P	46.1	39.2	-1.97024	2.39459	5.75415e-06	0.0032825	-1.8699	0.273593	183.107	669.27	148.11	129.592	173.549	134.447	269.676	243.269	672.579	651.153	907.658	605.001	625.499	553.729
6.44_728.4137m/z	728.414	6.43975	pos	OHDdiA-PE	LMGP20020051	Lipids and lipid-like molecules	Glycerophospholipids	Oxidized glycerophospholipids	M+Na	C35H64NO11P	37.3	18.4	3.91285	1.24397	0.000830156	0.0114836	-1.76732	0.293754	59.9599	204.116	42.6456	42.6381	14.3743	93.6321	46.231	120.238	165.166	187.748	301.014	182.285	259.949	128.534
6.19_610.3140m/z	610.314	6.19065	neg	PG-PS	LMGP20040016	Lipids and lipid-like molecules	Glycerophospholipids	Oxidized glycerophospholipids	M-H	C27H50NO12P	43.9	47.1	23.2272	1.08941	0.000106021	0.00881228	-1.75206	0.296878	43.1133	145.223	37.2433	42.3859	51.6228	45.1879	48.4913	33.7489	198.857	189.29	139.279	118.917	124.941	100.051
6.57_672.3724m/z	672.372	6.57073	pos	PHODiA-PG	LMGP20060007	Lipids and lipid-like molecules	Glycerophospholipids	Oxidized glycerophospholipids	M+NH4	C30H55O13P	38.5	5.07	0.764844	3.22395	0.0054651	0.0248415	-1.49965	0.35364	592.587	1675.68	690.499	596.351	261.072	738.912	353.255	915.435	1557.83	1230.19	2994.42	1561.52	1776.36	933.759
6.71_542.3117m/z	542.312	6.71473	pos	PG-PA	LMGP20070016	Lipids and lipid-like molecules	Glycerophospholipids	Oxidized glycerophospholipids	M+NH4	C24H45O10P	37.2	0.0453	5.40124	1.23982	0.00496543	0.0237159	-1.44275	0.367866	90.8722	247.025	92.8816	83.7615	63.4681	117.229	56.8287	131.064	219.049	212.94	433.887	231.666	261.362	123.247
6.47_628.3461m/z	628.346	6.46892	pos	OS-PG	LMGP20060020	Lipids and lipid-like molecules	Glycerophospholipids	Oxidized glycerophospholipids	M+NH4	C28H51O12P	38.4	11.3	0.786125	2.20849	0.00600846	0.0261564	-1.33929	0.395216	332.97	842.501	382.14	316.978	141.637	455.385	203.196	498.484	795.109	656.218	1465.74	802.274	840.853	494.814
3.01_738.4476m/z	738.448	3.01075	pos	OHODA-PG	LMGP20060035	Lipids and lipid-like molecules	Glycerophospholipids	Oxidized glycerophospholipids	M+NH4	C36H65O12P	40.2	32.8	-10.4991	1.36048	0.000778947	0.0112853	-1.26068	0.417348	128.012	306.727	231.607	126.812	85.3461	111.964	90.5394	121.804	269.412	319.736	405.429	240.425	381.615	223.744
6.76_730.3996m/z	730.4	6.7594	pos	OA-PC	LMGP20010030	Lipids and lipid-like molecules	Glycerophospholipids	Oxidized glycerophospholipids	M+K	C35H66NO10P	30.1	10.4	-8.72324	1.3059	0.00383471	0.020868	-1.16654	0.445488	140.082	314.446	130.363	91.7305	74.8469	200.068	100.581	242.904	281.999	220.455	485.038	305.062	336.059	258.065
6.42_578.3000n	596.336	6.42425	pos	PKODiA-PA	LMGP20070008	Lipids and lipid-like molecules	Glycerophospholipids	Oxidized glycerophospholipids	M+H, M+NH4	C27H47O11P	34.4	1.82	24.8989	1.63405	0.00201005	0.0154851	-1.11515	0.461643	221.305	479.385	184.385	217.315	93.5885	318.977	178.242	335.322	481.637	405.971	695.691	459.865	500.272	332.875
6.33_714.4048m/z	714.405	6.33258	pos	OON-PC	LMGP20010029	Lipids and lipid-like molecules	Glycerophospholipids	Oxidized glycerophospholipids	M+K	C35H66NO9P	33.3	0	-8.6407	1.43869	0.00109853	0.0124463	-0.994034	0.502072	196.465	391.309	235.472	185.024	130.738	240.847	114.828	271.883	357.774	364.401	531.37	386.968	427.806	279.536
3.01_680.4058m/z	680.406	3.01075	pos	PHDdiA-PE	LMGP20020025	Lipids and lipid-like molecules	Glycerophospholipids	Oxidized glycerophospholipids	M+H	C33H62NO11P	44.9	44.7	-11.0479	1.01083	0.0392105	0.0847814	-0.761396	0.589925	203.196	344.444	262.157	188.637	107.274	272.794	205.157	183.159	392.722	227.754	536.608	363.452	161.475	384.653
5.91_645.3713m/z	645.371	5.90927	pos	OKODA-PA	LMGP20070033	Lipids and lipid-like molecules	Glycerophospholipids	Oxidized glycerophospholipids	M+H	C33H57O10P	37.9	0	-7.58355	1.60854	0.00237602	0.0165043	-0.449205	0.732446	679.868	928.216	673.481	645.73	542.92	779.376	637.051	800.65	826.255	949.114	1027.14	982.025	1035.93	748.825
6.54_612.3298m/z	612.33	6.54047	neg	OKOOA-PE	LMGP20020044	Lipids and lipid-like molecules	Glycerophospholipids	Oxidized glycerophospholipids	M-H2O-H	C31H54NO10P	50.2	53.5	-1.4852	8.12875	6.68953e-05	0.00841241	-0.430336	0.742089	16018.6	21585.8	13917.8	16984.6	16290.5	16418.1	17316.7	15184	24347.9	22058.9	21244.7	21665.3	20961.7	19236.5
5.60_704.4040m/z	704.404	5.60295	pos	OKDdiA-PE	LMGP20020049	Lipids and lipid-like molecules	Glycerophospholipids	Oxidized glycerophospholipids	M+H	C35H62NO11P	35.6	0	-13.2658	1.12549	0.0139593	0.0422078	-0.169484	0.889161	1123.37	1263.41	1079.51	1112.08	1049.37	1219.04	1088.06	1192.18	1115.07	1324.42	1208.15	1325.49	1366.89	1240.43
4.35_406.1838n	424.218	4.35202	pos	Cycloaltilisin 7	LMPK12140317	Lipids and lipid-like molecules	Polyketides	Flavonoids	M+NH4, M+Na, M+H	C25H26O5	36.6	5.62	14.1881	1.89933	0.0187314	0.0507223	-1.20153	0.434815	365.792	841.261	377.695	354.769	646.487	233.014	313.795	268.995	739.299	807.666	698.997	912.739	354.12	1534.74
6.61_841.4614m/z	841.461	6.61373	pos	Avermectin B1b	LMPK04000020	Lipids and lipid-like molecules	Polyketides	Macrolides and lactone polyketides	M+H-H2O	C47H70O14	36	8.13	-13.8174	1.22262	0.00101172	0.0121611	-2.12832	0.228724	42.3387	185.108	68.7893	6.08283	10.4193	65.4721	1.28368e-06	103.269	171.312	146.608	299.902	147.427	214.587	130.812
2.77_726.4483m/z	726.448	2.76692	pos	Erythromycin D	LMPK04000010	Lipids and lipid-like molecules	Polyketides	Macrolides and lactone polyketides	M+Na	C36H65NO12	44.3	55.2	12.0028	1.18104	0.0398997	0.0858639	-1.81869	0.283479	73.0929	257.843	165.965	92.1872	48.4698	43.9239	34.0372	53.9748	152.161	319.734	551.389	101.463	355.044	67.2666
3.17_548.3460m/z	548.346	3.1704	pos	L-Oleandrosyl-oleandolide	LMPK04000033	Lipids and lipid-like molecules	Polyketides	Macrolides and lactone polyketides	M+NH4	C27H46O10	49	67.5	5.8792	1.49466	0.0295071	0.0691159	-1.78937	0.289298	113.159	391.149	166.37	91.9659	76.4126	113.703	80.9055	149.597	215.159	494.494	770.844	160.858	588.731	116.809
2.82_770.4746m/z	770.475	2.82375	pos	Clarithromycin	LMPK04000014	Lipids and lipid-like molecules	Polyketides	Macrolides and lactone polyketides	M+Na	C38H69NO13	43.3	46	11.3547	1.10399	0.0353587	0.0786892	-1.76275	0.294685	67.4361	228.841	129.832	53.6827	48.9668	47.6485	35.5304	88.9561	117.69	282.901	471.313	63.0703	328.93	109.142
6.54_709.3839m/z	709.384	6.54175	pos	Monensin A	LMPK09000001	Lipids and lipid-like molecules	Polyketides	Polyether antibiotics	M+K	C36H62O11	37.8	10.8	-12.6022	1.23578	0.0109783	0.0366061	-0.906239	0.533574	194.355	364.252	290.343	168.534	57.0665	272.307	78.1975	299.685	466.809	260.086	428.543	382.131	344.212	303.73
6.86_635.3368m/z	635.337	6.8634	pos	4-Keto-4'-hydroxydiatoxanthin	LMPR01070076	Lipids and lipid-like molecules	Prenol lipids	Isoprenoids	M+K	C40H52O4	33.4	2.26	-21.6789	1.02227	0.00447066	0.022536	-1.10303	0.465537	93.9051	201.713	139.356	83.7261	26.9299	121.338	69.1806	122.9	243.194	138.862	286.749	216.603	186.099	138.774
6.26_907.4988m/z	907.499	6.25525	pos	Oscillol diglycoside/ Oacillol bisglycoside/ (Oscillaxanthin)	LMPR01070188	Lipids and lipid-like molecules	Prenol lipids	Isoprenoids	M+H-H2O	C52H76O14	33.4	4.03	-23.1877	1.63611	0.000663692	0.0109345	-1.08123	0.472625	219.58	464.597	206.196	222.808	128.28	285.396	148.616	326.183	452.148	417.913	614.684	457.254	519.37	326.211
2.79_811.4542m/z	811.454	2.79182	neg	bayogenin 3-O-cellobioside	LMPR0106150009	Lipids and lipid-like molecules	Prenol lipids	Isoprenoids	M-H	C42H68O15	39.9	14.5	6.96132	3.29877	0.0147803	0.0436398	-0.770404	0.586253	1756.02	2995.33	1811.5	1607.12	1269.63	1755.96	1904.01	2187.91	2473.29	2907.67	4452.13	2586.89	3823.42	1728.57
6.32_775.4206m/z	775.421	6.31792	pos	gypsogenin 3-O-rhamnosylglucosiduronic acid	LMPR0106150006	Lipids and lipid-like molecules	Prenol lipids	Isoprenoids	M+H-H2O	C42H64O14	35.7	6.95	-7.16263	1.73618	0.00165378	0.0142761	-0.764382	0.588706	427.284	725.803	513.622	451.17	223.563	509.591	291.779	573.98	775.074	616.805	890.59	745.965	687.458	638.926
5.89_683.3904m/z	683.39	5.89343	pos	Neurosporaxanthin beta-D-glucopyranoside	LMPR01070207	Lipids and lipid-like molecules	Prenol lipids	Isoprenoids	M+Na	C41H56O7	38.3	14.5	-2.11761	1.11152	0.00164695	0.0142351	-0.347075	0.786176	425.415	541.119	460.492	404.173	362.127	495.025	381.514	449.159	508.847	558.697	533.794	560.526	602.673	482.179
3.58_632.3979n	650.431	3.57638	pos	oleanolic acid 3-O-beta-D-glucosiduronic acid	LMPR0106150003	Lipids and lipid-like molecules	Prenol lipids	Isoprenoids	M+H, M+NH4	C36H56O9	40.3	17.5	8.7074	2.57898	0.0200612	0.0530431	-0.28769	0.819213	3707.65	4525.87	4096.02	3452.74	3318.14	3636.22	3733.48	4009.3	4022.98	4543.18	5740.21	4316.17	4628.29	3904.4
6.95_679.7101m/z	679.71	6.95057	pos	Cer(m18:1(4E)/26:0)	LMSP00000009	Lipids and lipid-like molecules	Sphingolipids	Other Sphingolipids	M+NH4	C44H87NO2	37.2	0	3.93776	1.23278	0.0040566	0.0214208	-3.04228	0.12139	21.3009	175.475	1.28368e-06	14.94	1.28368e-06	46.1126	1.28368e-06	66.7526	130.986	162.662	356.845	127.056	199.065	76.2325
2.98_459.2892m/z	459.289	2.98208	pos	Dihomodeoxycholic acid	LMST04020031	Lipids and lipid-like molecules	Sterol Lipids	Bile acids and derivatives	M+K	C26H44O4	40	38.8	5.0638	1.86195	0.0123122	0.0391734	-1.0433	0.485218	368.966	760.413	481.303	317.493	282.982	396.307	390.148	345.561	571.136	852.666	1226.98	512.334	964.013	435.345
2.88_415.2630m/z	415.263	2.88108	pos	Lithocholic acid	LMST04010003	Lipids and lipid-like molecules	Sterol Lipids	Bile acids and derivatives	M+K	C24H40O3	42.3	21.9	5.65969	1.71747	0.0136267	0.0416516	-0.529892	0.692607	789.183	1139.44	1018.91	628.792	691.098	689.267	867.13	839.906	980.672	1177.33	1542.35	973.643	1284.21	878.431
3.74_404.2515n	422.285	3.73705	pos	3alpha,12alpha-Dihydroxy-15-oxo-5beta-chol-8(14)-en-24-oic Acid	LMST04010357	Lipids and lipid-like molecules	Sterol Lipids	Bile acids and derivatives	M+H, M+NH4	C24H36O5	37.3	14.2	-11.7328	1.1195	0.0203424	0.0535181	-0.415462	0.749779	449.033	598.887	465.515	397.178	403.894	455.012	480.694	491.905	513.717	637.302	827.552	547.536	599.867	467.348
7.15_768.4134m/z	768.413	7.15088	pos	(6R)-vitamin D3 6,19-[4-{2-(6,7-dimethoxy-4-methyl-3-oxo-3,4-dihydroquinoxalinyl)ethyl}-1,2,4-triazoline-3,5-dione] adduct	LMST03020541	Lipids and lipid-like molecules	Sterol Lipids	Secosteroids	M+K	C42H59N5O6	38	0.0337	5.13298	1.28754	0.000576836	0.0108512	-2.32048	0.200201	38.2731	191.174	32.9089	31.4544	6.36295	62.5529	7.39022	88.9695	199.876	137.114	317.8	183.494	182.622	126.137
6.77_540.2938m/z	540.294	6.77457	pos	(23E)-26,26,26,27,27,27-hexafluoro-1alpha,25-dihydroxy-23,24-didehydrovitamin D3	LMST03020083	Lipids and lipid-like molecules	Sterol Lipids	Secosteroids	M+NH4	C27H36F6O3	40.9	19.6	5.95202	1.55454	0.00208825	0.0156768	-1.25175	0.419939	171.817	409.148	187.924	176.107	93.1738	210.769	114.784	248.146	403.791	320.547	649.712	405.319	395.617	279.903
6.92_540.2941m/z	540.294	6.92122	pos	(22E)-26,26,26,27,27,27-hexafluoro-1alpha,25-dihydroxy-22,23-didehydrovitamin D3	LMST03020082	Lipids and lipid-like molecules	Sterol Lipids	Secosteroids	M+NH4	C27H36F6O3	41.3	20.3	6.53352	2.07782	0.0057846	0.0256384	-1.18504	0.439813	352.528	801.541	386.474	314.067	181.683	492.093	218.002	522.849	817.61	623	1336.91	766.134	733.013	532.577
7.27_797.4343m/z	797.434	7.2662	pos	Pandaroside A	LMST05050003	Lipids and lipid-like molecules	Sterol Lipids	Steroid conjugates	M+H	C41H64O15	37.1	3.95	3.17309	2.04009	0.0200313	0.0529744	-3.0878	0.11762	65.7785	559.248	85.3871	44.0721	1.28368e-06	96.8056	6.47009	161.936	406.56	404.64	1397.67	355.747	610.929	179.945
7.54_716.3722m/z	716.372	7.54222	pos	Evasterioside A	LMST05050012	Lipids and lipid-like molecules	Sterol Lipids	Steroid conjugates	M+NH4	C33H55NaO12S	30.6	0	10.3407	1.31749	0.00129516	0.0131446	-1.92662	0.263045	59.3138	225.489	56.3328	74.6435	16.8514	97.852	6.85801	103.345	262.759	189.21	377.001	196.887	167.815	159.261
6.69_496.2683m/z	496.268	6.68557	pos	Sulfoglycolithocholic acid	LMST05030015	Lipids and lipid-like molecules	Sterol Lipids	Steroid conjugates	M+H-H2O	C26H43NO7S	40.5	21.7	-8.62626	1.0112	0.0138083	0.041927	-1.00945	0.496735	112.437	226.351	117.631	108.192	40.1899	157.314	84.8237	166.469	256.344	147.84	359.748	251.629	196.9	145.647
2.35_547.2960m/z	547.296	2.34918	neg	5beta-scymnol sulfate	LMST05020017	Lipids and lipid-like molecules	Sterol Lipids	Steroid conjugates	M-H	C27H48O9S	41.4	17.5	2.54162	2.41835	0.0213658	0.0554855	-0.523869	0.695504	1618.57	2327.19	1778.53	1492.65	1164.83	1582.21	1734.79	1958.42	2044.26	2247.2	3299.07	2203.88	2577.58	1591.17
3.52_588.3714n	606.405	3.51888	pos	25-hydroxyvitamin D2 25-(beta-glucuronide)	LMST05010021	Lipids and lipid-like molecules	Sterol Lipids	Steroid conjugates	M+H, M+NH4	C34H52O8	43.5	33.1	8.74373	2.49456	0.0461625	0.0955618	-0.24365	0.844606	4716.48	5584.23	5101.84	4274.63	4174.02	4686.81	4951.93	5109.61	5122.28	5575.95	7211.02	5267.71	5482.24	4846.21
5.65_568.3167n	586.336	5.64945	pos	Chenodeoxycholic acid 3-glucuronide	LMST05010022	Lipids and lipid-like molecules	Sterol Lipids	Steroid conjugates	M+H-H2O, M+NH4	C30H48O10	37.1	11.9	-14.147	1.65589	0.00905979	0.0326672	-0.207083	0.866287	1859.07	2146.01	1786.13	1894.3	1597.41	2070.04	1740.17	2066.35	2097.76	2137.76	2187.01	2328.16	2131.13	1994.26
6.34_359.2219m/z	359.222	6.33542	neg	progesterone	LMST02030159	Lipids and lipid-like molecules	Sterol Lipids	Steroids	M+FA-H	C21H30O2	37.8	4.46	-2.79754	1.01606	0.000228057	0.00974942	-2.78485	0.145103	15.4758	106.654	3.75159	15.8723	17.8732	4.85649	21.8748	28.6265	118.22	108.956	152.451	138.617	64.731	56.9486
6.96_665.3655m/z	665.365	6.96488	pos	6-O-(Glcb)-(25R)-5alpha-spirostan-3beta,6alpha,23S-triol	LMST01080070	Lipids and lipid-like molecules	Sterol Lipids	Sterols	M+K	C34H58O10	40.8	19.8	-1.07809	1.43187	0.00109181	0.0124391	-1.68061	0.311951	90.5169	290.164	83.2858	76.302	22.1853	136.48	64.4317	160.416	287.825	232.51	475.852	213.072	285.103	246.619
6.48_557.3198m/z	557.32	6.48342	pos	Cucurbitacin H	LMST01010109	Lipids and lipid-like molecules	Sterol Lipids	Sterols	M+Na	C30H46O8	30.6	0	21.159	1.06419	0.00677567	0.0279529	-1.57696	0.335187	59.9319	178.801	60.4718	40.1481	28.4273	88.9799	47.4341	94.13	156.946	162.997	334.371	153.48	172.927	92.0867
6.10_782.7716m/z	782.772	6.09777	pos	Cholesteryl 23-methyl pentacosanoate	LMST01020108	Lipids and lipid-like molecules	Sterol Lipids	Sterols	M+NH4	C53H96O2	32.6	0	-4.29463	1.02333	0.000872217	0.0116281	-1.42039	0.373612	57.6853	154.399	51.3917	48.6136	12.9396	93.1657	39.5001	100.501	139.792	142.857	212.239	155.218	177.28	99.0087
6.89_544.2765n	562.307	6.89223	pos	2-deoxy-20-hydroxyecdysone 22-phosphate	LMST01010181	Lipids and lipid-like molecules	Sterol Lipids	Sterols	M+H, M+NH4	C27H45O9P	38.6	7.93	-6.58911	2.57266	0.00351934	0.0199648	-1.28854	0.409365	463.287	1131.72	511.742	425.15	220.183	614.14	306.619	701.889	1100.2	881.89	1871.48	1146.53	1038.56	751.667
2.94_437.2763m/z	437.276	2.93858	pos	Minabeolide-5	LMST01160006	Lipids and lipid-like molecules	Sterol Lipids	Sterols	M+H-H2O	C28H38O5	39.2	27.8	16.9057	1.89586	0.00892456	0.0323672	-0.883307	0.542124	476.226	878.445	673.874	347.904	397.561	400.528	537.38	500.107	730.953	944.29	1321.74	669.766	1040.47	563.45
6.30_797.4389m/z	797.439	6.30225	pos	diginatin	LMST01120012	Lipids and lipid-like molecules	Sterol Lipids	Sterols	M+H	C41H64O15	37.8	11.5	8.93088	2.17713	0.00176028	0.0145247	-0.683672	0.622579	774.377	1243.82	935.98	784.608	424.545	923.052	586.722	991.355	1279.35	1132.8	1509.99	1259.08	1217.23	1064.48
5.96_635.3556m/z	635.356	5.95627	pos	26-O-[beta-D-glucopyranosyl]-25R-furostan-3beta,22alpha,26-triol	LMST01070001	Lipids and lipid-like molecules	Sterol Lipids	Sterols	M+K	C33H56O9	38.9	7.34	0.0534677	1.29442	0.0032072	0.0190746	-0.382305	0.767211	559.381	729.11	617.496	601.479	406.204	639.533	476.513	615.06	761.906	672.391	788.043	757.046	734.685	660.588
6.08_811.7876m/z	811.788	6.08193	pos	2-eicosyl-3-hydroxy-tritriaconta-16Z-enoic acid	LMFA01160026	Unclassified	Unclassified	Unclassified	M+Na	C53H104O3	36.5	0	-0.157664	1.05373	0.000385079	0.0105866	-1.74684	0.297953	42.7957	143.633	47.6303	34.5598	13.8298	58.4428	24.4165	77.8954	121.087	144.915	212.546	135.976	157.517	89.7543
2.82_393.2503m/z	393.25	2.82375	pos	N6-physeteroyl lysine	LMFA08020267	Unclassified	Unclassified	Unclassified	M+K	C20H38N2O3	38.6	3.64	-3.08674	1.61141	0.0149141	0.0438565	-0.373114	0.772114	1040.21	1347.23	1226.96	800.174	985.069	944.242	1155.41	1129.44	1221.31	1413.97	1680.32	1268.09	1401.19	1098.5
